# Supplementary material
Source: Research Square preprint supplement (doi:10.21203/rs.3.rs-9064014/v1)

**Supplementary Appendix**

[List of LZ901-300 Study Trial Investigators 1](#_Toc19107)

[Inclusion and exclusion criteria 4](#_Toc6166)

[Measurement of gE-Specific Antibody Concentrations 7](#_Toc8171)

[Suspected cases of herpes zoster 8](#_Toc23955)

[Table S1. Vaccine efficacy against herpes zoster from 1 month after the second vaccine dose in subgroups* 10](#_Toc29716)

[Table S2. Vaccine efficacy against herpes zoster associated severe acute pain from 1 month after the second vaccine dose in subgroups* 12](#_Toc5456)

[Table S3. Vaccine efficacy against herpes zoster infection within the 30 days of vaccination 14](#_Toc18896)

[Table S4. Adverse reaction related to vaccination 30 days after vaccination 15](#_Toc20581)

[Table S5. Serious adverse events within 12 months after vaccination by system organs 18](#_Toc19029)

[Table S6. Anti-gE antibody concentrations in immunogenicity subcohort 19](#_Toc1450)

[Table S7. High-risk chronic diseases associated with herpes zoster  21](#_Toc8623)

[Table S8 Characteristics of clinically confirmed cases 24](#_Toc18242)

[Table S9 Number of deaths and causes of death in the vaccine and placebo groups 29](#_Toc32408)

[Figure S1.Herpes zoster case ascertainment 31](#_Toc24985)

[Figure S2. gE-specific IgG antibody concentrations 32](#_Toc23032)

[Figure S3. Reverse cumulative distribution plots of antibody concentrations 33](#_Toc5986)

# List of LZ901-300 Study Trial Investigators

| **Institute** | **Name** | **Location** |
| --- | --- | --- |
| Jiangsu Provincial Center for Disease Control and Prevention | Pengfei Jin, M.Sc. | Nanjing, China |
| China National Institutes for Food and Drug Control，National Institutes for Food and Drug Control | Yaru Quan, Ph.D. | Beijing, China |
| Shanxi Provincial Center for Disease Control and Prevention | Xuefeng Gao, M.Sc. | Shanxi, China |
| Jiangsu Provincial Center for Disease Control and Prevention | Mingwei Wei, M.Sc. | Nanjing, China |
| Jiangsu Provincial Center for Disease Control and Prevention | Hongxing Pan, M.Sc. | Nanjing, China |
| Hubei Provincial Center for Disease Control and Prevention | Heng Shen, M.Sc. | Hubei, China |
| Shanxi Provincial Center for Disease Control and Prevention | Lei Zhao, M.Sc. | Shanxi, China |
| Shandong Provincial Center for Disease Control and Prevention | Qing Xu, M.Sc. | Shandong, China |
| School of Public Health, Southeast University | Xiang Cao, B.Sc. | Nanjing, China |
| Hubei Provincial Center for Disease Control and Prevention | Zhao Wang, M.Sc. | Hubei, China |
| Shandong Provincial Center for Disease Control and Prevention | Xiaodong Liu, Ph.D. | Shandong, China |
| Tigerrmed | Jinmei Xu, M.Sc. | Beijing, China |
| China National Institutes for Food and Drug Control，National Institutes for Food and Drug Control | Kangwei Xu, Ph.D. | Beijing, China |
| China National Institutes for Food and Drug Control，National Institutes for | Wenyan Wan, Ph.D. | Beijing, China |
| National Key Laboratory of Intelligent Tracking and Forecasting for Infectious Diseases, National Institute for Viral Disease Control and Prevention, Chinese Center for Disease Control and Prevention | Songtao Xu, Ph.D. | Beijing, China |
| Shandong Provincial Center for Disease Control and Prevention | Li Zhang, Ph.D. | Shandong, China |
| Hubei Provincial Center for Disease Control and Prevention | Yeqing Tong, Ph.D. | Hubei, China |
| Jiangsu Provincial Center for Disease Control and Prevention | Jingxin Li, Ph.D. | Nanjing, China |
| Jiangsu Provincial Center for Disease Control and Prevention | Qi Liang, B.Sc. | Nanjing, China |
| Jiangsu Provincial Center for Disease Control and Prevention | Wenjuan Wang, M.Sc. | Nanjing, China |
| Jiangsu Provincial Center for Disease Control and Prevention | Jingjing Zhao, B.Sc. | Nanjing, China |
| Jiangsu Provincial Center for Disease Control and Prevention | Yanjun Chen, M.Sc. | Nanjing, China |
| Hubei Provincial Center for Disease Control and Prevention | Kui Ma, M.Sc. | Hubei, China |
| Shandong Provincial Center for Disease Control and Prevention | Shengzhang Yan, M.Sc. | Shandong, China |
| Shandong Provincial Center for Disease Control and Prevention | Ziqiang Yu, M.Sc. | Shandong, China |
| Shandong Provincial Center for Disease Control and Prevention | Ping Xiong, M.Sc. | Shandong, China |
| Shandong Provincial Center for Disease Control and Prevention | Xia Feng, M.Sc. | Shandong, China |
| Guanyun Center for Disease Control and Prevention | Shihua Ma, B.Sc. | Jiangsu, China |
| Yixing Center for Disease Control and Prevention | Junwei Yin, B.Sc. | Jiangsu, China |
| Huaiyin District Center for Disease Control and Prevention | Jingliang Wu, M.Sc. | Jiangsu, China |
| Zhangjiang Center for Disease Control and Prevention | Hong Zhu, M.Sc. | Jiangsu, China |
| Yichang Center for Disease Control and Prevention | Xiaojun Liu, M.Sc. | Hubei, China |
| Huanggang Center for Disease Control and Prevention | Fen Wang, M.Sc. | Hubei, China |
| Zhijiang Center for Disease Control and Prevention | Binge Qian, M.Sc. | Hubei, China |
| Ruicheng Center for Disease Control and Prevention | Zhengping Dong, M.Sc. | Shanxi, China |
| Yanhu District Center for Disease Control and Prevention | Gaimei Li, B.Sc. | Shanxi, China |
| Yuanping Maternal and Child Health Service Center | Liying Lv, B.Sc. | Shanxi, China |
| Feicheng City Center for Disease Control and Prevention | Zhenhua Du, B.Sc. | Shanxi, China |
| Zoucheng City Center for Disease Control and Prevention | Zhaoyan Sun, B.Sc. | Shanxi, China |
| Daiyue District Center for Disease Control and Prevention | Xinwei Li | Shanxi, China |

# Inclusion and exclusion criteria

The volunteers had to meet all following inclusion and exclusion criteria to be eligible for the study.

**Inclusion criteria**

1. Age 40 years or older on the day of enrollment, regardless of gender, and able to provide legal identification.
2. Able to understand the trial procedures, voluntarily agree to participate in thes tudy, and sign the "Informed Consent Form."
3. Female subjects are not pregnant or lactating. Female subjects with childbearing potential should take reliable contraceptive measures, and have no pregnancy and fertility plan within 8 months;
4. Axillary temperature ≤ 37.0°C on the day of enrollment.
5. Able to attend all scheduled follow-up visits and able to comply with protocol requirements.

**Exclusion criteria**

1. History of herpes zoster within the past 5 years.
2. Previous vaccination with varicella vaccine or zoster vaccine (including use of registered products or participation in clinical trials for varicella or zoster vaccines).
3. Allergy to any component of the study vaccine: Previous allergy to any recombinant vaccine derived from CHO cells (such as recombinant hepatitis B vaccine [CHO cells]), polysorbates, or a history of severe allergic reactions to any vaccination.

*Severe allergic reactions: Anaphylactic shock, allergic laryngeal edema, allergic purpura, thrombocytopenic purpura, localized allergic necrotic reaction (Arthus reaction), severe urticaria, etc.

4. Diagnosis of immune deficiency diseases (such as congenital or acquired immunodeficiency, HIV infection, etc.), or receiving immunosuppressive/cytotoxic treatment (e.g., chemotherapy, organ transplantation, or planned treatment during the clinical trial within 6 months before vaccination).

5. Subjects who received immunosuppressive therapy within 3 months before vaccination, or planning to receive such treatment within 1 month after full immunization (e.g., long-term use of systemic glucocorticoids for ≥ 14 days, dose ≥ 2 mg/kg/day or ≥ 20 mg/day prednisone or equivalence);

6. Receiving an inactivated vaccine, recombinant vaccine, or mRNA vaccine within 14 days or any live vaccine within 28 days prior to vaccination;

7. Subjects with acute illness or in the acute phase of a chronic disease within 3 days prior to vaccination.

8. Asplenia or splenectomy.

9. Subjects who receive blood products or immunoglobulin therapy within 3 months before vaccination, or planning to use such products within 2 months after vaccination.

10. Participating in other clinical studies of investigational or un-registered products (drugs, vaccines or devices, etc.), or planning to participate in other clinical studies before the end of this clinical study.

11. Any significant underlying medical condition (e.g., life-threatening diseases that may limit survival to less than 4 years) or other conditions that the investigator believes may interfere with the completion of the study.

# Measurement of gE-Specific Antibody Concentrations

The levels of gE-specific IgG antibodies were determined by ELISA. gE protein (Beijing Luzhu Biotechnology Co., Ltd. Beijing, China) was diluted with coating buffer to a final concentration of 0.2 µg/mL and then used to coat 96-well microplates. After washing 3 times with phosphate-buffered saline-Tween (PBS-T) solution, the plates were blocked with 200 µL/well solution (1% bovine serum albumin [BSA] in phosphate-buffered saline [PBS]) at 37 ◦C for 1 h. After removing the blocking solution, the plates were incubated in twofold-diluted human serum (100 µL/well) starting at 50-fold at 37 ◦C for 1 h. After washing 4 times, horseradish peroxidase (HRP)-labeled anti-human IgG antibody was added to each well, and plates were incubated at 37 ◦C for 1 h. After washing 5 times,3,3′,5,5′-tetramethylbenzidine (TMB substrate (BD Biosciences, San Diego, CA, USA)) was added to the plate. Eight minutes later, the reaction was stopped, and the absorbance was measured at 450 nm with a microplate reader. The standard curve between antibody concentration and absorbance OD value was obtained by using varicella-zoster virus (VZV) antibody standard (Anti-Varicella Zoster Immunoglobulin, W1044, NIBSC). The absorbance values of each well of the sample were substituted into the standard curve to calculate the antibody concentration in each well. If the deviation of antibody concentration between successive dilutions of the same sample did not exceed 30%, the mean value was used as the final antibody concentration. Anti-gE antibody cut-off value is 100 milli-International Units (mIU)/mL.

# Suspected cases of herpes zoster

A suspected case of herpes zoster was defined as the occurrence of new unilateral rash with or without pain (broadly defined to include allodynia, pruritus, or other sensations) after vaccination. Participants were instructed to reported any suspected signs or symptoms of herpes zoster to investigators immediately upon development. In addition, investigators conducted monthly telephone follow-ups to remind participants to report any suspected herpes zoster episodes. All reported suspected cases were assessed face-to-face by a study physician within 48 hours. Participants receiving a clinical diagnosis of herpes zoster were provided with complimentary famciclovir (a licensed antiviral) by the study physician, alongside standard-of-care pain management. Rash photography and lesion sample collection were performed. The samples were tested using a real-time polymerase chain reaction (PCR) assay targeting the VZV ORF38 gene, with a lower detection limit of 37 VZV DNA copies per reaction. Rash characteristics, associated complications, and medication use were also documented.

A case was classified as laboratory-confirmed if the PCR assay tested positive for VZV DNA, and such classification was further determined by the Clinical Event Committee (CEC) through adjudication. When the PCR result was negative, or sample was not available due to inadequate collection or missing specimen, the suspected case underwent adjudication by a CEC. The CEC consisted of three senior dermatologists who were blinded to study group assignments and assessed cases based on available clinical information, including rash and pain evaluations, digital photographs, and clinical progress notes, to make a final determination of clinically confirmed cases of herpes zoster.

Pain associated with herpes zoster, including symptoms such as allodynia and pruritus, was assessed using the Zoster Brief Pain Inventory. This questionnaire evaluated the impact of herpes zoster on daily activities, quality of life, and general health status. It was administered once daily until participants were pain-free for 4 consecutive weeks, and once weekly thereafter. All the participants with confirmed herpes zoster were followed for at least 90 days after the onset of the episode or until the rash resolved and being pain-free for 4 weeks.

# Table S1. Vaccine efficacy against herpes zoster from 1 month after the second vaccine dose in subgroups*

| **Subgroup** | **LZ901 group** | | | | **Placebo group** | | | | **Vaccine Efficacy**  **% (95% CI)**† |
| --- | --- | --- | --- | --- | --- | --- | --- | --- | --- |
| No. of  Participants | No. of  Cases | Cumulative  follow-up  person-years‡ | Incidence  per 1000 person-year | No. of  Participants | No. of  Cases | Cumulative  follow-up  person-years‡ | Incidence  per 1000 person-year |
| **Per-protocol populationr** | | | | | | | | | |
| Overall | 12707 | 15 | 11376.9 | 1.3 | 12680 | 178 | 11292.8 | 15.8 | 91.6 (86.3-95.3) |
| Sex | | | | | | | | | |
| Male | 5199 | 5 | 4648.8 | 1.1 | 5197 | 75 | 4624.1 | 16.2 | 93.4 (85.2-97.7) |
| Female | 7508 | 10 | 6728.2 | 1.5 | 7483 | 103 | 6668.7 | 15.4 | 90.4 (82.5-95.3) |
| Age group | | | | | | | | | |
| 40-49 | 2947 | 2 | 2641.4 | 0.8 | 2935 | 33 | 2619.5 | 12.6 | 94.0 (80.2-99.0) |
| 50-59 | 4398 | 2 | 3948.1 | 0.5 | 4391 | 65 | 3917.4 | 16.6 | 96.9 (90.3-99.5) |
| 60-69 | 4384 | 6 | 3915.3 | 1.5 | 4282 | 65 | 3890.3 | 16.7 | 90.8 (80.5-96.5) |
| ≥70 | 978 | 5 | 872.1 | 5.7 | 972 | 15 | 865.6 | 17.3 | 66.9 (14.6-89.2) |
| Region | | | | | | | | | |
| Jiangsu  Province | 3656 | 6 | 3223.5 | 1.9 | 3652 | 58 | 3203.7 | 18.1 | 89.7 (78.1-96.0) |
| Shandong Province | 2453 | 3 | 2209.2 | 1.4 | 2450 | 39 | 2193.5 | 17.8 | 92.4 (79.0-98.2) |
| Hubei  Province | 3668 | 3 | 3276.0 | 0.9 | 3657 | 48 | 3246.3 | 14.8 | 93.8 (83.1-98.5) |
| Shanxi  Province | 2930 | 3 | 2668.2 | 1.1 | 2921 | 33 | 2649.2 | 12.5 | 91.0 (74.9-97.8) |
| Chronic diseases | | | | | | | | | |
| Yes | 3457 | 7 | 3090.4 | 2.3 | 3636 | 72 | 3221.6 | 22.3 | 89.9 (79.5-95.8) |
| No | 9250 | 8 | 8286.5 | 1.0 | 9044 | 106 | 8071.2 | 13.1 | 92.6 (85.9-96.7) |
| **Modified intention-to-treat population** | | | | | | | | | |
| Overall | 13010 | 16 | 11651.0 | 1.4 | 13008 | 178 | 11589.9 | 15.4 | 91.1 (85.6-94.8) |
| Sex | | | | | | | | | |
| Male | 5324 | 5 | 4762.5 | 1.0 | 5307 | 75 | 4723.7 | 15.9 | 93.4 (85.2-97.7) |
| Female | 7686 | 11 | 6888.5 | 1.6 | 7701 | 103 | 6866.2 | 15.0 | 89.4 (81.1-94.6) |
| Age group | | | | | | | | | |
| 40-49 | 3001 | 2 | 2690.2 | 0.7 | 3001 | 33 | 2679.2 | 12.3 | 94.0 (80.2-99.0) |
| 50-59 | 4505 | 3 | 4044.4 | 0.7 | 4506 | 65 | 4021.6 | 16.2 | 95.4 (87.7-98.9) |
| 60-69 | 4501 | 6 | 4021.6 | 1.5 | 4500 | 65 | 3997.3 | 16.3 | 90.8 (80.5-96.5) |
| ≥70 | 1003 | 5 | 894.8 | 5.6 | 1001 | 15 | 891.9 | 16.8 | 66.8 (14.2-89.2) |
| Region | | | | | | | | | |
| Jiangsu  Province | 3760 | 6 | 3318.0 | 1.8 | 3759 | 58 | 3300.9 | 17.6 | 89.7 (78.0-96.0) |
| Shandong Province | 2500 | 3 | 2251.7 | 1.3 | 2498 | 39 | 2237.0 | 17.4 | 92.4 (78.9-98.2) |
| Hubei  Province | 3750 | 4 | 3349.1 | 1.2 | 3750 | 48 | 3329.8 | 14.4 | 91.7 (79.7-97.5) |
| Shanxi  Province | 3000 | 3 | 2732.2 | 1.1 | 3001 | 33 | 2722.2 | 12.1 | 90.9 (74.8-97.8) |
| Chronic diseases | | | | | | | | | |
| Yes | 3550 | 8 | 3174.3 | 2.5 | 3750 | 72 | 3324.6 | 21.7 | 88.4 (77.3-94.8) |
| No | 9460 | 8 | 8476.7 | 0.9 | 9258 | 106 | 8265.3 | 12.8 | 92.6 (85.9-96.7) |

*The per-protocol population consisted of participants who have received two doses of LZ901 or placebo, with no major protocol deviations. The modified intention-to-treat population consisted of participants who received at least one dose of LZ901 or placebo.

†Efficacy was calculated by means of the Poisson regression method. For the comparison of efficacy against herpes zoster of the vaccine versus placebo, P<0.001 in all subgroups except for in the ≥70 years age subgroup, with P=0.016 in both the per-protocol population and modified intention-to-treat population.

‡ Data were censored at the time of the first confirmed diagnosis of herpes zoster or postherpetic neuralgia

# Table S2. Vaccine efficacy against herpes zoster associated severe acute pain from 1 month after the second vaccine dose in subgroups*

| **Subgroup** | **LZ901 group** | | | | **Placebo group** | | | | **Vaccine Efficacy**  **% (95% CI)**† |
| --- | --- | --- | --- | --- | --- | --- | --- | --- | --- |
| No. of  Participants | No. of  Cases | Cumulative  follow-up  person-years‡ | Incidence  per 1000 person-years | No. of  Participants | No. of  Cases | Cumulative  follow-up  person-years‡ | Incidence  per 1000 person-years |
| **Per-protocol population** | | | | | | | | | |
| Overall | 12707 | 12 | 11376.9 | 1.1 | 12680 | 160 | 11292.8 | 14.1 | 92.6 (87.2-96.1) |
| Sex | | | | | | | | | |
| Male | 5199 | 4 | 4648.8 | 0.9 | 5197 | 65 | 4624.1 | 14.1 | 93.9 (85.2-98.1) |
| Female | 7508 | 8 | 6728.2 | 1.2 | 7483 | 95 | 6668.7 | 14.3 | 91.7 (83.9-96.3) |
| Age group | | | | | | | | | |
| 40-49 | 2947 | 1 | 2641.4 | 0.4 | 2935 | 30 | 2619.5 | 11.5 | 96.7 (84.6-99.8) |
| 50-59 | 4398 | 2 | 3948.1 | 0.5 | 4391 | 56 | 3917.4 | 14.3 | 96.5 (88.6-99.4) |
| 60-69 | 4384 | 5 | 3915.3 | 1.3 | 4282 | 60 | 3890.3 | 15.4 | 91.7 (81.3-97.1) |
| ≥70 | 978 | 4 | 872.1 | 4.6 | 972 | 14 | 865.6 | 16.2 | 71.6 (20.9-92.0) |
| Region | | | | | | | | | |
| Jiangsu Province | 3656 | 5 | 3223.5 | 1.6 | 3652 | 54 | 3203.7 | 16.9 | 90.8 (77.0-96.3) |
| Shandong Province | 2453 | 3 | 2209.2 | 1.4 | 2450 | 37 | 2193.5 | 16.9 | 91.9 (73.9-97.5) |
| Hubei  Province | 3668 | 3 | 3276.0 | 0.9 | 3657 | 39 | 3246.3 | 12.0 | 92.4 (75.3-97.6) |
| Shanxi Province | 2930 | 1 | 2668.2 | 0.4 | 2921 | 30 | 2649.2 | 11.3 | 96.7 (75.7-99.5) |
| Chronic diseases | | | | | | | | | |
| Yes | 3457 | 6 | 3090.4 | 1.9 | 3636 | 63 | 3221.6 | 19.6 | 90.1 (78.9-96.2) |
| No | 9250 | 6 | 8286.5 | 0.7 | 9044 | 97 | 8071.2 | 12.0 | 94.0 (87.4-97.6) |
| **Modified intention-to-treat population** | | | | | | | | | |
| Overall | 13010 | 12 | 11651.0 | 1.0 | 13008 | 160 | 11589.9 | 13.8 | 92.5 (87.2-96.1) |
| Sex | | | | | | | | | |
| Male | 5324 | 4 | 4762.5 | 0.8 | 5307 | 65 | 4723.7 | 13.8 | 93.9 (85.2-98.1) |
| Female | 7686 | 8 | 6888.5 | 1.2 | 7701 | 95 | 6866.2 | 13.8 | 91.6 (83.8-96.2) |
| Age group | | | | | | | | | |
| 40-49 | 3001 | 1 | 2690.2 | 0.4 | 3001 | 30 | 2679.2 | 11.1 | 96.7 (84.5-99.8) |
| 50-59 | 4505 | 2 | 4044.4 | 0.5 | 4506 | 56 | 4021.6 | 13.9 | 96.4 (88.6-99.4) |
| 60-69 | 4501 | 5 | 4021.6 | 1.2 | 4500 | 60 | 3997.3 | 15.0 | 91.7 (81.3-97.1) |
| ≥70 | 1003 | 4 | 894.8 | 4.5 | 1001 | 14 | 891.9 | 15.7 | 71.5 (20.6-91.9) |
| Region | | | | | | | | | |
| Jiangsu Province | 3760 | 5 | 3318.0 | 1.5 | 3759 | 54 | 3300.9 | 16.4 | 90.8 (79.1-96.8) |
| Shandong Province | 2500 | 3 | 2251.7 | 1.3 | 2498 | 37 | 2237.0 | 16.5 | 91.9 (77.7-98.1) |
| Hubei Province | 3750 | 3 | 3349.1 | 0.9 | 3750 | 39 | 3329.8 | 11.7 | 92.4 (78.9-98.2) |
| Shanxi Province | 3000 | 1 | 2732.2 | 0.4 | 3001 | 30 | 2722.2 | 11.0 | 96.7 (84.5-99.8) |
| Chronic diseases | | | | | | | | | |
| Yes | 3550 | 6 | 3174.3 | 1.9 | 3750 | 63 | 3324.6 | 18.9 | 90.0 (78.8-96.1) |
| No | 9460 | 6 | 8476.7 | 0.7 | 9258 | 97 | 8265.3 | 11.7 | 94.0 (87.4-97.6) |

*The per-protocol population consisted of participants who have received two doses of LZ901 or placebo, with no major protocol deviations. The modified intention-to-treat population consisted of participants who received at least one dose of LZ901 or placebo.

†Efficacy was calculated by means of the Poisson regression method. For the comparison of efficacy against herpes zoster associated severe acute pain of the vaccine versus placebo, P<0.001 in all subgroups except for in the ≥70 years age subgroup, with P=0.013 in both the per-protocol population and modified intention-to-treat population.

‡ Data were censored at the time of the first confirmed diagnosis of herpes zoster or postherpetic neuralgia

# Table S3. Vaccine efficacy against herpes zoster infection within the 30 days of vaccination

| **Subgroup** | **LZ901 group** | | | | **Placebo group** | | | | **Vaccine Efficacy**  **% (95% CI)** |
| --- | --- | --- | --- | --- | --- | --- | --- | --- | --- |
| No. of  Participants | No. of  Cases | Cumulative  follow-up  person-years | Incidence  per 1000 person-years | No. of  Participants | No. of  Cases* | Cumulative  follow-up  person-years | Incidence  per 1000 person-years |
| First dose |  |  |  |  |  |  |  |  |  |
| 0-14 days | 13010 | 8 | 970.9 | 8.2 | 13008 | 11 | 965.8 | 11.4 | 27.7 (-78.7-72.0) |
| 15-30 days | 13010 | 1 | 970.9 | 1.0 | 13008 | 7 | 965.8 | 7.2 | 85.8 (20.1-99.2) |
| 0-30 days | 13010 | 9 | 970.9 | 9.3 | 13008 | 18 | 965.8 | 18.6 | 50.3 (-8.0-78.7) |
| Second dose |  |  |  |  |  |  |  |  |  |
| 0-14 days | 13010 | 1 | 970.9 | 1.0 | 13008 | 6 | 965.8 | 6.2 | 83.4 (2.9-99.1) |
| 15-30 days | 13010 | 0 | 970.9 | 0 | 13008 | 6 | 965.8 | 6.2 | 100.0 (54.9-100.0) |
| 0-30 days | 13010 | 1 | 970.9 | 1.0 | 13008 | 12 | 965.8 | 12.4 | 91.7 (57.9-99.5) |

*1 confirmed case in the placebo group was excluded because the participant had received only one dose and not the second dose.

# Table S4. Adverse reaction related to vaccination 30 days after vaccination

|  | **1st dose** | | | **2nd dose** | | | **Total** | | |
| --- | --- | --- | --- | --- | --- | --- | --- | --- | --- |
|  | LZ901 group  (N=13010) | Placebo group  (N=13008) | p value | LZ901 group  (N=12791) | Placebo group  (N=12786) | p value | LZ901 group  (N=13011†) | Placebo group  (N=13008) | p value |
| Total adverse reation | 1726(13.3) | 963(7.4) | <0.001 | 616(4.8) | 271(2.1) | <0.001 | 2137(16.4) | 1167(9.0) | <0.001 |
| Grade1 | 1382(10.6) | 727(5.6) | <0.001 | 457(3.6) | 154(1.2) | <0.001 | 1646(12.7) | 826(6.4) | <0.001 |
| Grade2 | 314(2.4) | 203(1.6) | <0.001 | 141(1.1) | 108(0.8) | 0.042 | 444(3.4) | 299(2.3) | <0.001 |
| Grade 3 | 30(0.2) | 33(0.3) | 0.800 | 18(0.2) | 9(0.1) | 0.999 | 47(0.4) | 42(0.3) | 0.672 |
| Solicited injection-site reaction | 1012 (7.78) | 343 (2.64) | <0.001 | 649 (5.1) | 168 (1.3) | <0.001 | 1503 (11.6) | 484 (3.7) | <0.001 |
| Grade1 | 908 (7.0) | 334 (2.6) | <0.001 | 613 (4.8) | 160 (1.3) | <0.001 | 1365 (10.5) | 468 (3.6) | <0.001 |
| Grade2 | 100 (0.8) | 9 (0.1) | <0.001 | 34 (0.3) | 8 (0.1) | <0.001 | 132 (1.0) | 16 (0.1) | <0.001 |
| Grade 3 | 4 (0.03) | 0 | 0.125 | 2 (0.02) | 0 | 0.500 | 6 (0.05) | 0 | 0.031 |
| Pain | 870 (6.7) | 318 (2.4) | <0.001 | 605 (4.7) | 161 (1.3) | <0.001 | 1334 (10.3) | 454 (3.5) | <0.001 |
| Grade1 | 852 (6.5) | 312 (2.4) | <0.001 | 591 (4.6) | 155 (1.2) | <0.001 | 1302 (10.0) | 442 (3.4) | <0.001 |
| Grade2 | 18 (0.1) | 6 (0.05) | 0.018 | 14 (0.1) | 6 (0.05) | 0.118 | 32 (0.3) | 12 (0.1) | 0.004 |
| Pruritus | 152 (1.2) | 23 (0.2) | <0.001 | 50 (0.4) | 7 (0.05) | <0.001 | 191 (1.5) | 29 (0.2) | <0.001 |
| Grade1 | 139 (1.1) | 21 (0.2) | <0.001 | 48 (0.4) | 6 (0.05) | <0.001 | 176 (1.4) | 27 (0.2) | <0.001 |
| Grade2 | 13 (0.1) | 2 (0.02) | 0.004 | 2 (0.01) | 1 (0.01) | >0.999 | 15 (0.1) | 2 (0.02) | 0.002 |
| Induration | 94 (0.7) | 3 (0.02) | <0.001 | 52 (0.4) | 3 (0.02) | <0.001 | 141 (1.1) | 6 (0.05) | <0.001 |
| Grade1 | 69 (0.5) | 3 (0.02) | <0.001 | 46 (0.4) | 2 (0.02) | <0.001 | 110 (0.8) | 5 (0.04) | <0.001 |
| Grade2 | 25 (0.2) | 0 | <0.001 | 5 (0.04) | 1 (0.01) | 0.219 | 30 (0.2) | 1 (0.01) | <0.001 |
| Grade3 | 0 | 0 | - | 1 (0.01) | 0 | >0.999 | 1 (0.01) | 0 | >0.999 |
| Swelling | 145 (1.1) | 6 (0.05) | <0.001 | 48 (0.4) | 3 (0.02) | <0.001 | 188 (1.4) | 9 (0.07) | <0.001 |
| Grade1 | 89 (0.7) | 5 (0.04) | <0.001 | 31 (0.2) | 1 (0.01) | <0.001 | 117 (0.9) | 6 (0.05) | <0.001 |
| Grade2 | 53 (0.4) | 1 (0.01) | <0.001 | 16 (0.1) | 2 (0.02) | 0.002 | 67 (0.5) | 3 (0.02) | <0.001 |
| Grade3 | 3 (0.02) | 0 | 0.250 | 1 (0.01) | 0 | >0.999 | 4 (0.03) | 0 | 0.125 |
| Rash | 2 (0.02) | 1 (0.01) | >0.999 | 1 (0.01) | 1 (0.01) | >0.999 | 3 (0.02) | 2 (0.02) | >0.999 |
| Grade1 | 1 (0.01) | 1 (0.01) | >0.999 | 1 (0.01) | 1 (0.01) | >0.999 | 2 (0.02) | 2 (0.02) | >0.999 |
| Grade2 | 1 (0.01) | 0 | 0.499 | 0 | 0 | - | 1 (0.01) | 0 | >0.999 |
| Redness | 106 (0.8) | 3 (0.02) | <0.001 | 19 (0.1) | 1 (0.01) | <0.001 | 122 (1.0) | 4 (0.03) | <0.001 |
| Grade1 | 64 (0.5) | 3 (0.02) | <0.001 | 15 (0.1) | 1 (0.01) | <0.001 | 76 (0.6) | 4 (0.03) | <0.001 |
| Grade2 | 39 (0.3) | 0 | <0.001 | 3 (0.02) | 0 | 0.249 | 42 (0.3) | 0 | <0.001 |
| Grade3 | 3 (0.02) | 0 | 0.250 | 1 (0.01) | 0 | >0.999 | 4 (0.03) | 0 | 0.125 |
| Solicited systemic reaction | 521 (4.0) | 413 (3.2) | <0.001 | 195 (1.5) | 163 (1.3) | 0.099 | 681 (5.2) | 555 (4.3) | <0.001 |
| Grade1 | 397 (3.1) | 300 (2.3) | <0.001 | 136 (1.1) | 106 (0.8) | 0.061 | 500 (3.8) | 389 (3.0) | <0.001 |
| Grade2 | 102 (0.8) | 87 (0.7) | 0.285 | 42 (0.3) | 45 (0.4) | 0.590 | 143 (1.1) | 128 (1.0) | 0.203 |
| Grade3 | 22 (0.2) | 26 (0.2) | 0.664 | 17 (0.1) | 12 (0.1) | 0.553 | 38 (0.3) | 38 (0.3) | >0.999 |
| Fever | 157 (1.2) | 120 (0.9) | 0.030 | 86 (0.7) | 67 (0.5) | 0.406 | 236 (1.8) | 185 (1.4) | 0.014 |
| Grade1 | 102 (0.8) | 74 (0.6) | 0.041 | 57 (0.4) | 43 (0.3) | 0.484 | 153 (1.2) | 115 (0.9) | 0.023 |
| Grade2 | 35 (0.3) | 26 (0.2) | 0.366 | 14 (0.1) | 13 (0.1) | 0.887 | 49 (0.4) | 39 (0.3) | 0.381 |
| Grade3 | 20 (0.2) | 20 (0.2) | >0.999 | 15 (0.1) | 11 (0.1) | 0.717 | 34 (0.3) | 31 (0.2) | 0.805 |
| Headache | 141 (1.1) | 114 (0.9) | 0.102 | 38 (0.3) | 32 (0.3) | 0.296 | 177 (1.4) | 141 (1.1) | 0.049 |
| Grade1 | 110 (0.8) | 80 (0.6) | 0.035 | 18 (0.1) | 15 (0.1) | 0.142 | 126 (1.0) | 91 (0.7) | 0.021 |
| Grade2 | 30 (0.2) | 31 (0.2) | 0.887 | 19 (0.1) | 17 (0.1) | 0.973 | 49 (0.4) | 47 (0.4) | 0.885 |
| Grade3 | 1 (0.01) | 3 (0.02) | 0.348 | 1 (0.01) | 0 | 0.499 | 2 (0.02) | 3 (0.02) | 0.683 |
| Myalgia | 88 (0.7) | 60 (0.5) | 0.026 | 20 (0.2) | 15 (0.1) | 0.485 | 107 (0.8) | 74 (0.6) | 0.017 |
| Grade1 | 77 (0.6) | 50 (0.4) | 0.021 | 16 (0.1) | 13 (0.1) | 0.663 | 92 (0.7) | 62 (0.5) | 0.019 |
| Grade2 | 11 (0.1) | 9 (0.1) | 0.631 | 4 (0.03) | 2 (0.02) | 0.433 | 15 (0.1) | 11 (0.1) | 0.502 |
| Grade3 | 0 | 1 (0.01) | 0.499 | 0 | 0 | - | 0 | 1 (0.01) | 0.499 |
| Gastrointestinal symptoms | 101 (0.8) | 89 (0.7) | 0.435 | 18 (0.1) | 20 (0.2) | 0.681 | 119 (0.9) | 109 (0.9) | 0.538 |
| Grade1 | 81 (0.6) | 72 (0.6) | 0.566 | 14 (0.1) | 17 (0.2) | 0.537 | 95 (0.7) | 89 (0.7) | 0.689 |
| Grade2 | 20 (0.2) | 16 (0.1) | 0.548 | 4 (0.03) | 3 (0.02) | 0.777 | 24 (0.2) | 19 (0.1) | 0.498 |
| Grade3 | 0 | 1 (0.01) | 0.499 | 0 | 0 | - | 0 | 1 (0.01) | 0.499 |
| Arthralgia | 27 (0.2) | 16 (0.1) | 0.127 | 12(0.09) | 5 (0.04) | 0.169 | 38 (0.3) | 21 (0.2) | 0.037 |
| Grade1 | 21 (0.2) | 15 (0.1) | 0.443 | 9(0.07) | 4 (0.03) | 0.282 | 29 (0.2) | 19 (0.1) | 0.242 |
| Grade2 | 6 (0.05) | 1 (0.01) | 0.125 | 3 (0.02) | 1 (0.01) | 0.617 | 9 (0.1) | 2 (0.02) | 0.068 |
| Allergic reaction | 6 (0.05) | 6 (0.05) | >0.999 | 2 (0.02) | 2 (0.02) | >0.999 | 8 (0.1) | 8 (0.1) | >0.999 |
| Grade1 | 4 (0.03) | 4 (0.03) | >0.999 | 1 (0.01) | 1 (0.01) | >0.999 | 5 (0.04) | 5 (0.04) | >0.999 |
| Grade2 | 2 (0.02) | 2 (0.01) | 0.999 | 1 (0.01) | 1 (0.01) | >0.999 | 3 (0.02) | 3 (0.02) | >0.999 |
| Unsolicited adverse reaction | 218 (1.7) | 218 (1.7) | 0.998 | 131 (1.02) | 109 (0.9) | 0.154 | 341 (2.6) | 320 (2.5) | 0.409 |
| Grade1 | 96 (0.7) | 90 (0.7) | 0.660 | 40 (0.3) | 39 (0.3) | 0.911 | 132 (1.0) | 126 (0.9) | 0.709 |
| Grade2 | 119 (0.9) | 123 (0.9) | 0.795 | 91 (0.7) | 70 (0.6) | 0.097 | 206 (1.6) | 189 (1.5) | 0.390 |
| Grade3 | 3 (0.02) | 5 (0.04) | 0.508 | 0 | 0 | - | 3 (0.02) | 5 (0.04) | 0.508 |

† One participant in the placebo received the placebo at injection 1 and the LZ901 vaccine at injection 2

# Table S5. Serious adverse events within 12 months after vaccination by system organs

|  | LZ901 group  (N=13010) | Placebo group  (N=13008) | P value |
| --- | --- | --- | --- |
| Total | 425 (3.27) | 475 (3.65) | 0.089 |
| Infectious and infestations | 86 (0.66) | 124 (0.95) | 0.008* |
| Nervous disorders | 76 (0.58) | 97 (0.75) | 0.109 |
| Neoplasms | 52 (0.40) | 58 (0.45) | 0.566 |
| Injury and poisoning | 52 (0.40) | 36 (0.28) | 0.088 |
| Cardiac disorders | 45 (0.35) | 48 (0.37) | 0.755 |
| Musculoskeletal disorders | 28 (0.22) | 36 (0.28) | 0.316 |
| GI disorders | 26 (0.20) | 42 (0.32) | 0.052 |
| Hepatobiliary disorders | 19 (0.15) | 16 (0.12) | 0.612 |
| Respiratory disorders | 19 (0.15) | 14 (0.11) | 0.384 |
| Vascular disorders | 18 (0.14) | 16 (0.12) | 0.732 |
| Eye disorders | 11 (0.08) | 7 (0.054) | 0.346 |
| Reproductive disorders | 10 (0.08) | 9 (0.069) | 0.819 |
| Metabolism disorders | 9 (0.069) | 14 (0.11) | 0.297 |
| Ear disorders | 7 (0.054) | 9 (0.069) | 0.617 |
| Renal disorders | 6 (0.046) | 11 (0.08) | 0.225 |
| Skin disorders | 5 (0.038) | 2 (0.015) | 0.453 |
| Endocrine disorders | 3 (0.023) | 3 (0.023) | >0.999 |
| General disorders | 2 (0.015) | 3 (0.023) | 0.687 |
| Psychiatric disorders | 2 (0.015) | 3 (0.023) | 0.687 |
| Blood disorders | 0 | 2 (0.015) | 0.250 |
| Pregnancy conditions | 0 | 1 (0.008) | 0.500 |

*Statistically significant differences in infections and infestations between the vaccine and placebo groups were due to herpes zoster virus infections.

# Table S6. Anti-gE antibody concentrations in immunogenicity subcohort

|  | <70 years | | p value | ≥70 years | | p value | Total | | p value |
| --- | --- | --- | --- | --- | --- | --- | --- | --- | --- |
| LZ901 group  （N=1335） | Placebo group  （N=1326） | LZ901 group  （N=140） | Placebo group  （N=136） | LZ901 group  （N=1475） | Placebo group  （N=1462） |
| GMC  (Day 0) | 1155.0  (1097.7-1215.4) | 1143.4  (1088.9-1200.7) | 0.779 | 1129.9  (995.9-1282.0) | 1067.1  (895.7-1271.2) | 0.604 | 1152.6  (1099.0-1208.9) | 1136.1  (1083.7-1191.1) | 0.673 |
| GMC  (Day 30) | 33830.9  (32647.1-35057.6) | 1129.4  (1074.2-1187.4) | <0.001 | 27223.6  (24167.9-30665.8) | 1102.0  (931.4-1303.8) | <0.001 | 33140.3  (32022.8-34296.8) | 1126.8  (1073.9-1182.3) | <0.001 |
| GMC (Month 12) | 11167.0  (10718.0-11634.0) | 1273.4  (1212.5-1337.3) | <0.001 | 11193.2  (9898.6-12657.2) | 1461.3  (1235.5-1728.4) | <0.001 | 11169.4  (10743.7-11612.0) | 1289.8  (1230.4-1352.1) | <0.001 |
| GMFI  (Day 0 vs Day 30) | 29.3  (27.9-30.8) | 1.0  (0.9-1.01) | <0.001 | 24.1  (20.8-28.0) | 1.0  (1.0-1.1) | <0.001 | 28.8  (27.4-30.1) | 1.0  (0.9-1.0) | <0.001 |
| GMFI  (Day 0 vs Month 12) | 9.7  (9.2-10.2) | 1.1  (1.1-1.2) | <0.001 | 10.0  (8.7-11.6) | 1.4  (1.3-1.6) | <0.001 | 9.7  (9.3-10.2) | 1.1  (1.1-1.2) | <0.001 |
| 4-fold increase rate  (Day 0 vs Day 30) | 98.7  (98.0-99.3) | 0.8  (0.3-1.3) | <0.001 | 95.7  (90.9-98.4) | 0.7  (0.02-4.0) | <0.001 | 98.4  (97.6-99.0) | 0.8  (0.4-1.4) | <0.001 |
| 4-fold increase rate  (Day 0 vs Month 12) | 91.0  (89.5-92.6) | 2.9  (2.0-3.9) | <0.001 | 83.6  (77.4-89.7) | 5.9  (2.7-9.09) | <0.001 | 82.4  (80.4-84.3) | 3.2  (2.3-4.1) | <0.001 |

GMC, geometric mean concentratio ;GMFI, geometric mean fold increase;

# Table S7. High-risk chronic diseases associated with herpes zoster

| Classify | Disease | Percentage  (N=26018) |
| --- | --- | --- |
| Endocrine, nutritional or metabolic diseases | Diabetes Mellitus | 1601 (6.15%) |
| Hyperglycemia | 30 (0.12%) |
| Gout | 44 (0.17%) |
| Autoimmune Thyroiditis | 19 (0.07%) |
| Thyroid Disorders | 266 (1.02%) |
| Graves' Disease | 2 (0.01%) |
| Others | 1 (0.004%) |
| Hepatobiliary Diseases | Alcoholic Cirrhosis | 3 (0.01%) |
| Liver Failure | 1 (0.004%) |
| Infections and Infestations | Hepatic Schistosomiasis | 2 (0.01%) |
| Renal Tuberculosis | 3 (0.01%) |
| Bone Tuberculosis | 3 (0.01%) |
| Tuberculous Pleurisy | 4 (0.02%) |
| Pyelonephritis | 5 (0.02%) |
| Bronchitis | 15 (0.06%) |
| Pulmonary Tuberculosis | 18 (0.07%) |
| Chronic Hepatitis B | 57 (0.22%) |
| Others | 13 (0.02%) |
| Various Nervous System Diseases | Intracerebral Hemorrhage | 2 (0.01%) |
| Cerebral Thrombosis | 3 (0.01%) |
| Embolic Cerebral Infarction | 4 (0.02%) |
| Subarachnoid Hemorrhage | 5 (0.02%) |
| Parkinson's Disease | 14 (0.05%) |
| Cerebral Hemorrhage | 23 (0.09%) |
| Lacunar Infarction | 48 (0.18%) |
| Cerebral Infarction | 414 (1.59%) |
| Others | 17 (0.07%) |
| Various Musculoskeletal and Connective Tissue Diseases | Rheumatic Diseases | 58 (0.22%) |
| Gouty Arthritis | 3 (0.01%) |
| Ankylosing Spondylitis | 6 (0.02%) |
| Others | 3 (0.01%) |
| Respiratory system, chest, and mediastinal diseases | Cough Variant Asthma | 2 (0.01%) |
| Pulmonary Fibrosis | 2 (0.01%) |
| Bronchiectasis | 10 (0.04%) |
| Emphysema | 16 (0.06%) |
| Chronic Obstructive Pulmonary Disease | 25 (0.10%) |
| Asthma | 45 (0.17) |
| Chronic Bronchitis | 54 (0.21) |
| Others | 4 (0.02%) |
| Benign, Malignant, and Unspecified Nature Tumors (Including Cystic and Polypoid Lesions) | Prostate Cancer | 2 (0.01%) |
| Colon Cancer | 2 (0.01%) |
| Gastrointestinal Cancer | 2 (0.01%) |
| Lymphoma | 3 (0.01%) |
| Liver Cancer | 3 (0.01%) |
| Ovarian Cancer | 4 (0.02%) |
| Meningioma | 4 (0.02%) |
| Bladder Cancer | 4 (0.02%) |
| Papillary Thyroid Carcinoma | 6 (0.02%) |
| Rectal Cancer | 6 (0.02%) |
| Esophageal Cancer | 6 (0.02%) |
| Gastrointestinal Stromal Tumor | 7 (0.03%) |
| Endometrial Cancer | 10 (0.04%) |
| Malignant Lung Tumor | 10 (0.04%) |
| Gastric Cancer | 14 (0.05%) |
| Cervical Cancer | 19 (0.07%) |
| Thyroid Adenoma | 22 (0.08%) |
| Breast Cancer | 43 (0.17%) |
| Thyroid Cancer | 51 (0.20%) |
| Others | 21 (0.08%) |
| Kidney and Urinary System Diseases | Chronic Kidney Disease | 2 (0.01%) |
| Nephrotic Syndrome | 2 (0.01%) |
| IgA Nephropathy | 3 (0.01%) |
| Renal Function Impairment | 3 (0.01%) |
| Nephritis | 4 (0.02%) |
| Renal Atrophy | 5 (0.02%) |
| Renal Failure | 5 (0.02%) |
| Chronic Glomerulonephritis | 6 (0.02%) |
| Kidney Disease | 9 (0.03%) |
| Others | 1 (0.004%) |
| Cardiac Organ Diseases | Unstable Angina Pectoris | 2 (0.01%) |
| Coronary Artery Embolism | 2 (0.01%) |
| Acute Myocardial Infarction | 2 (0.01%) |
| Dilated Cardiomyopathy | 2 (0.01%) |
| Hypertensive Heart Disease | 2 (0.01%) |
| Coronary Artery Disease | 7 (0.03%) |
| Angina Pectoris | 8 (0.03%) |
| Heart Failure | 9 (0.03%) |
| Myocardial Infarction | 20 (0.08%) |
| Myocardial Ischemia | 25 (0.10%) |
| Coronary Arteriosclerosis | 323 (1.24%) |
| Others | 9 (0.03%) |
| Vascular and Lymphatic Diseases | Hypertension | 6123 (23.53%) |
| Ocular Organ Diseases | Diabetic Retinopathy | 3 (0.02%) |

# Table S8 Characteristics of clinically confirmed cases

| ID | First dose vaccination time | Second dose vaccination time | Pain status | | | Rash status | | | PCR result | Reasons for sample loss | Diagnostic results |
| --- | --- | --- | --- | --- | --- | --- | --- | --- | --- | --- | --- |
| Start time | End time | Character of pain | Start time | End time | Character of rash |
| S101-00282 | 2023-11-18 | 2023-12-20 | 2024-06-02 | 2024-06-12 | Pricking and burning pain | 2024-06-02 | 2024-06-20 | Clustered erythema and maculopapules appeared on the waist | Negative | - | Clinically confirmed case |
| S101-00349 | 2023-11-19 | 2023-12-21 | 2024-07-15 | 2024-07-28 | Pricking and electric shock-like pain | 2024-07-17 | 2024-07-30 | Clustered erythema and maculopapules emerged on the head and face | Negative | - | Clinically confirmed case |
| S101-01433 | 2023-11-27 | - | 2023-11-30 | 2023-12-06 | Pricking pain | 2023-11-30 | 2023-12-12 | Clustered blisters appeared on the abdomen | Negative | - | Clinically confirmed case |
| S101-02065 | 2023-12-01 | 2023-12-29 | 2024-01-18 | 2024-01-30 | Pricking and electric shock-like pain | 2024-01-19 | 2024-02-02 | Clustered maculopapules appeared on the thighs | Negative | - | Clinically confirmed case |
| S102-00573 | 2023-11-14 | 2023-12-18 | 2024-10-08 | 2024-12-02 | Pricking and burning pain | 2024-10-07 | 2024-10-30 | Clustered maculopapules and blisters appeared on the chest and left back | Negative | - | Clinically confirmed case |
| S102-01077 | 2023-11-16 | 2023-12-16 | 2024-10-09 | 2024-11-02 | Pricking pain | 2024-10-09 | 2024-10-20 | Clustered maculopapules and blisters appeared on the thighs | Negative | - | Clinically confirmed case |
| S102-03061 | 2023-12-01 | 2023-12-31 | 2024-11-02 | 2024-11-13 | Burning pain | 2024-11-02 | 2024-11-16 | Clustered erythema appeared on the waist | Negative | - | Clinically confirmed case |
| S103-00122 | 2023-11-24 | 2023-12-24 | 2024-08-26 | 2024-08-31 | Pain | 2024-08-26 | 2024-09-11 | Clustered erythema and maculopapules appeared on the waist and abdomen | - | No samples were obtained from the patient’s skin lesion site | Clinically confirmed case |
| S103-00140 | 2023-11-24 | 2023-12-24 | 2024-06-04 | 2024-07-17 | Pricking and electric shock-like pain | 2024-06-04 | 2024-06-19 | Zosteriform erythema and maculopapules appeared on the waist and abdomen | - | No samples were obtained from the patient’s skin lesion site | Clinically confirmed case |
| S201-00723 | 2023-11-08 | - | 2023-11-09 | 2023-11-24 | Pricking pain | 2023-11-09 | 2023-11-24 | Clustered maculopapules appeared on the chest and back | Negative | - | Clinically confirmed case |
| S201-01669 | 2023-11-21 | 2023-12-21 | 2024-04-05 | 2024-04-19 | Pricking pain | 2024-04-05 | 2024-04-19 | Zosteriform and clustered erythema and blisters appeared on the chest and neck | Negative | - | Clinically confirmed case |
| S203-00499 | 2023-11-08 | 2023-12-08 | 2024-05-16 | 2024-05-31 | Pricking and burning pain | 2024-05-16 | 2024-06-02 | Clustered maculopapules and blisters appeared on the head and face | Negative | - | Clinically confirmed case |
| S304-00531 | 2023-10-20 | 2023-11-21 | 2024-01 | 2024-01 | Pricking pain and numbness | 2024-01 | 2024-02 | Clustered maculopapules and blisters appeared on the waist | - | The subject’s skin lesions have completely resolved | Clinically confirmed case |
| S304-00659 | 2023-10-21 | - | 2023-10-22 | 2023-11-04 | Electric shock-like pain | 2023-10-22 | 2023-11-08 | Scattered maculopapules and blisters appeared on the waist and abdomen | Negative | - | Clinically confirmed case |
| S304-01718 | 2023-10-30 | 2023-12-11 | 2024-05-30 | 2024-06-19 | Pricking and electric shock-like pain | 2024-06-06 | 2024-06-22 | Erythema distributed along the medial aspect of the arm appeared on the medial aspect of the arm | Negative | - | Clinically confirmed case |
| S304-01875 | 2023-11-01 | 2023-12-01 | 2024-03-13 | 2024-04-07 | Pricking pain | 2024-03-13 | 2024-03-25 | Clustered maculopapules appeared on the waist | Negative | - | Clinically confirmed case |
| S401-00449 | 2023-10-25 | 2023-11-24 | 2024-05-03 | 2024-06-10 | Pricking pain | 2024-05-07 | 2024-07-02 | Clustered maculopapules appeared on the anterior aspect of the calf | Negative | - | Clinically confirmed case |
| S401-01231 | 2023-11-03 | 2023-12-03 | 2024-07-04 | 2024-07-16 | Pricking pain | 2024-07-03 | 2024-07-21 | Clustered blisters and maculopapules appeared on the buttocks | Negative | - | Clinically confirmed case |
| S402-00047 | 2023-10-15 | 2023-11-14 | 2024-10-04 | 2024-10-25 | Burning pain | 2024-10-06 | 2024-10-14 | Clustered blisters and erythema appeared on the posterior aspect of the back | Negative | - | Clinically confirmed case |

# Table S9 Number of deaths and causes of death in the vaccine and placebo groups

| Death records | LZ901 group | Vaccine group | P-value |
| --- | --- | --- | --- |
| Overall deaths | 18(0.14%) | 15(0.12) | 0.6017 |
| Diseases of the nervous system | 4(0.031%) | 3(0.023%) | >0.999 |
| Benign, malignant and tumors of unknown nature (including cystic and polypoid) | 4(0.031%) | 3(0.023%) | >0.9999 |
| Injury, poisoning or certain other consequences of external causes | 4(0.031%) | 1(0.008%) | 0.3750 |
| Cardiac diseases | 2(0.015%) | 5(0.038%) | 0.2889 |
| Infections and infestations | 2(0.015%) | 2(0.015%) | >0.9999 |
| Diseases of the respiratory system | 2(0.015%) | 1(0.008%) | >0.9999 |
| Systemic disorders and administration site reactions | 2(0.015%) | 0 | 0.5000 |
| Diseases of the skin and subcutaneous tissue | 1(0.008%) | 0 | >0.9999 |
| Mental and behavioural disorders | 1(0.008%) | 0 | >0.9999 |
| Gastrointestinal disorders | 1(0.008%) | 0 | >0.9999 |
| Endocrine, nutritional and metabolic diseases | 0 | 1(0.008%) | 0.4999 |
| Hepatobiliary disorders | 0 | 1(0.008%) | 0.4999 |

# Figure S1.Herpes zoster case ascertainment


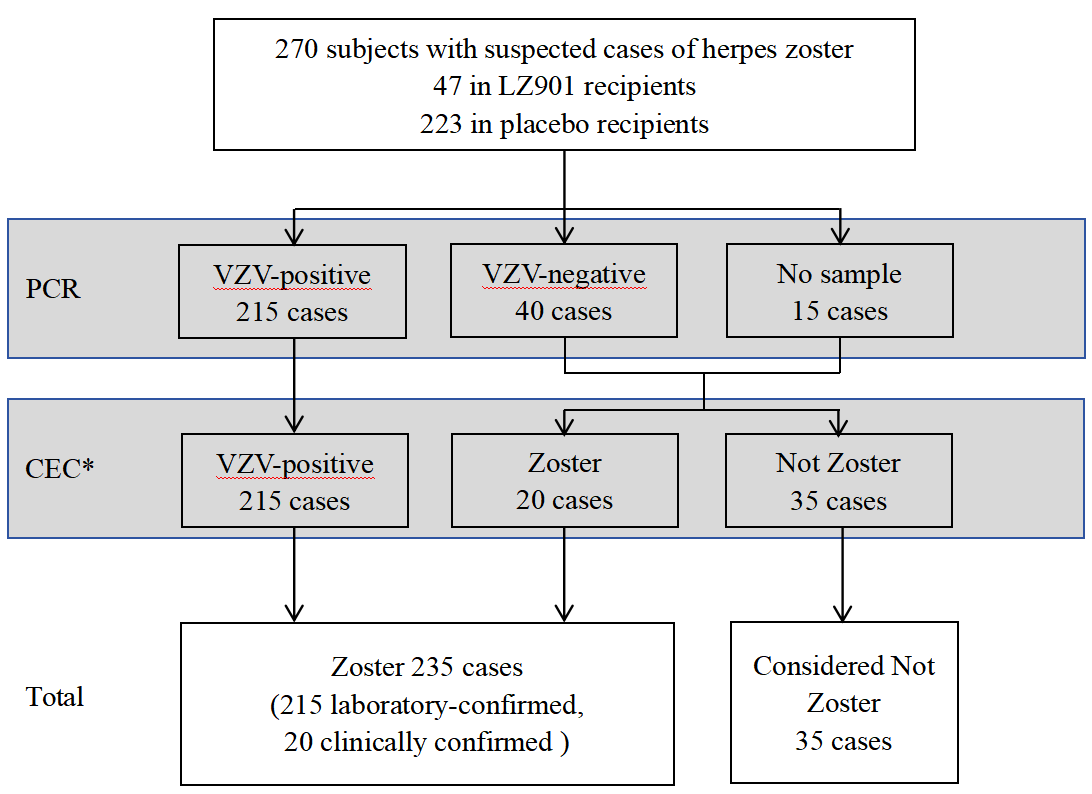


CEC, Clinical Event Committee;

PCR, polymerase chain reaction. Samples underwent real-time PCR targeting the VZV ORF38 gene (lower detection limit: 37 VZV DNA copies/reaction).

*Cases that meet the criteria for suspected herpes zoster (HZ), where laboratory diagnosis cannot be performed due to failure to collect valid samples or insufficient sample quantity, or where laboratory results are negative, but are determined as HZ by the CEC.

# Figure S2. gE-specific IgG antibody concentrations


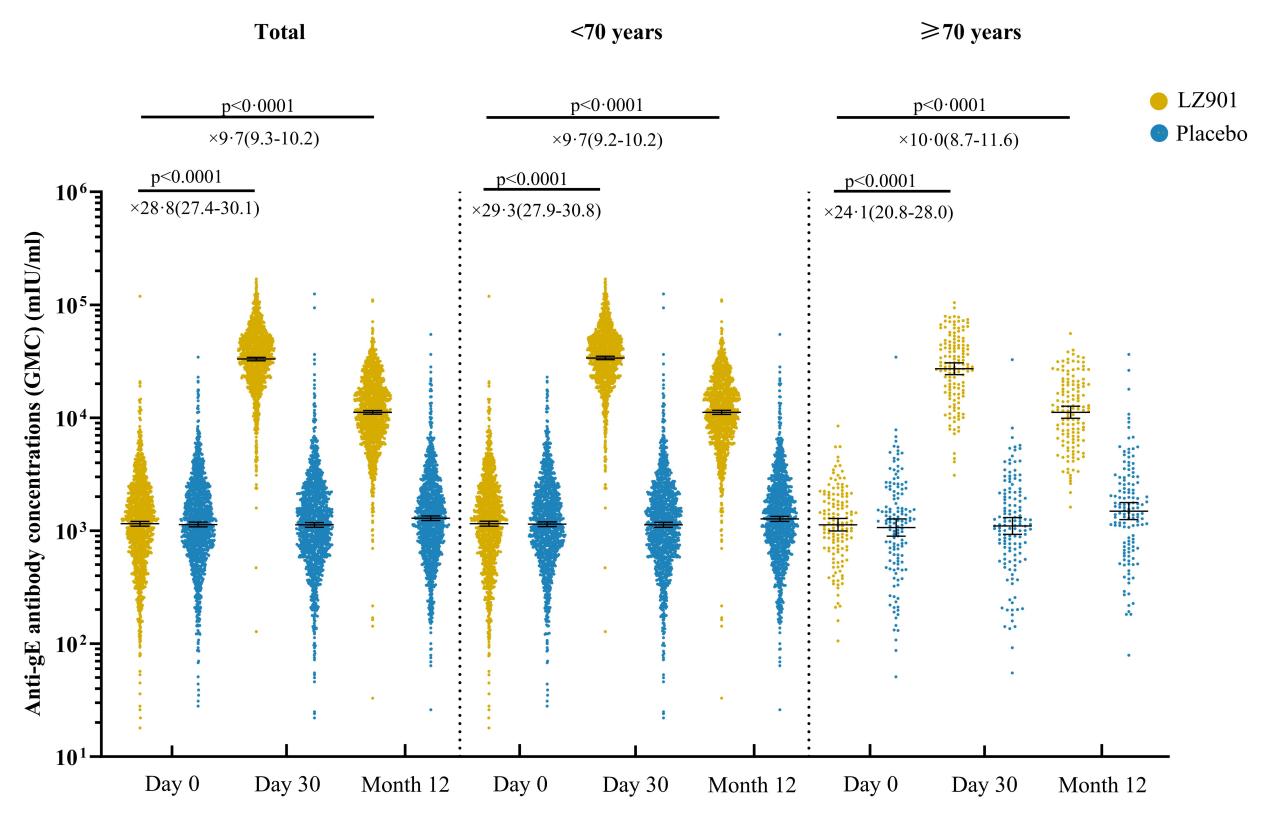


Shown is the geometric mean concentrations (GMCs) of gE-specific IgG antibody at baseline and 30 days and 12 months after the second dose of either the placebo or the LZ901 vaccine. Error bars represent 95% confidence intervals. The number under p value indicate that geometric mean fold increase (GMFI) of gE-specific IgG antibody day 30 or month 12 after the second dose to that baseline. Day 0, baseline before vaccination; Day 30, day 30 after the second dose; Month 12, month 12 after the second dose.

# Figure S3. Reverse cumulative distribution plots of antibody concentrations


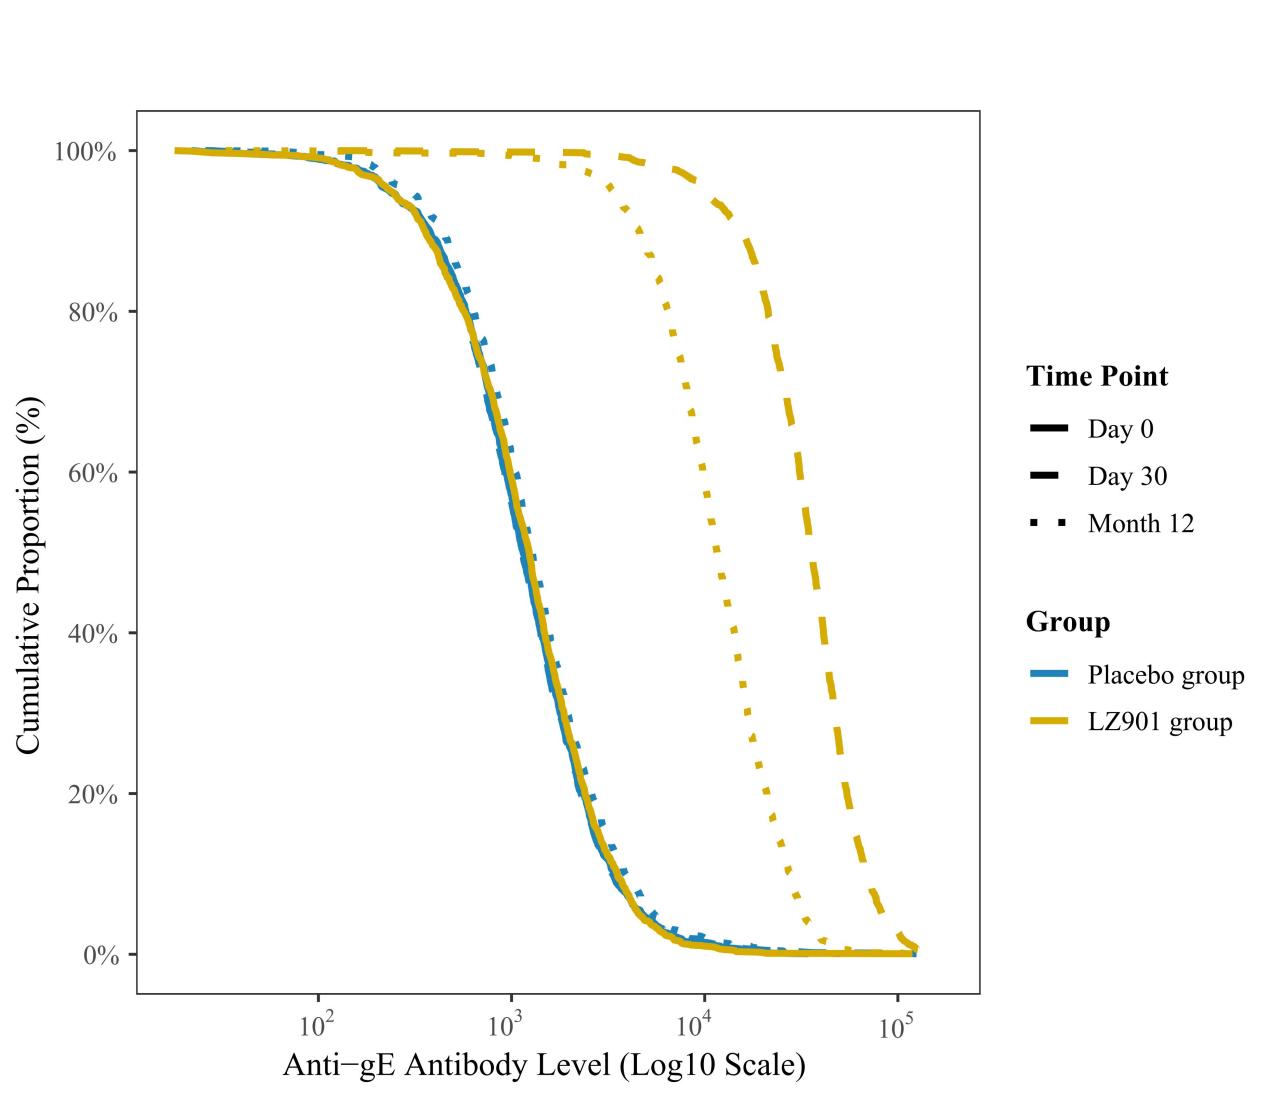

Supplement: Supplementary file 3 [file 91a7484b217b8a4d030a1ba9.docx]
