# Supplementary material
Source: Research Square preprint supplement (doi:10.21203/rs.3.rs-9064014/v1)
Supplement: Supplementary file 1 [file 1923473d6f46ecbbc91ba3b2.docx]

Beijing Luzhu Biotechnology Co., Ltd.
Luzhu Biopharmaceutical (Zhuhai) Co., Ltd.

**A multicenter, randomized, blinded clinical, placebo-controlled, phase III clinical trial to evaluate the efficacy and safety of the recombinant zoster vaccine (CHO Cells) LZ901 in subjects aged 40 years and older**

LZ901-300

Statistical Analysis Plan (SAP)

Analysis at 12 Months After the Full Immunization

Version: 2.0

Date: March 28, 2025

Sponsor Approval Page

A multicenter, randomized, blinded clinical, placebo-controlled, phase III clinical trial to evaluate the efficacy and safety of the recombinant zoster vaccine (CHO cells) LZ901 in subjects aged 40 years and older

LZ901-300

Statistical Analysis Plan (SAP)

Objective of the Analysis: Analysis at 12 Months After the Full Immunization

Version: 2.0

| Project Statistician: | Qin Fang | | |
| --- | --- | --- | --- |
| Company Name: | Hangzhou Tigermed Consulting Co., Ltd. | | |
| Signature Confirmation: |  | Date: |  |

| Reviewing Statistician: | Jinmei Xu | | |
| --- | --- | --- | --- |
| Company Name: | Hangzhou Tigermed Consulting Co., Ltd. | | |
| Signature Confirmation: |  | Date: |  |

| Reviewing Statistician: | Zhiqiang Xin | | |
| --- | --- | --- | --- |
| Company Name: | Hangzhou Tigermed Consulting Co., Ltd. | | |
| Signature Confirmation: |  | Date: |  |

| Sponsor Approver: | Qing Pan | | |
| --- | --- | --- | --- |
| Company Name: | Beijing Luzhu Biotechnology Co., Ltd. | | |
| Signature Confirmation: |  | Date: |  |

**Revision History**

| **Version** | **Version Date** | **Author** | **Description** |
| --- | --- | --- | --- |
| 1.0 | September 4, 2024 | Qin Fang | Initial Final Version |
| 2.0 | March 28, 2025 | Qin Fang | 1. Updated protocol version; 2. Added description of blind maintenance and unblinding at the time of 12-month analysis; 3. Corrected textual errors. |

Table of Contents

[Table of Contents 4](#_Toc24000)

[Abbreviation 6](#_Toc10636)

[1. Introduction 8](#_Toc17539)

[2. Study Overview 8](#_Toc4957)

[2.1. Study Design 8](#_Toc23678)

[2.2. Randomization 9](#_Toc24894)

[2.3. Blinding and Unblinding 9](#_Toc28418)

[2.3.1. Blinding 9](#_Toc31836)

[2.3.2. Blinding Maintenance 9](#_Toc20554)

[2.3.3. Unblinding Procedures 9](#_Toc16576)

[2.3.4. Emergency Unblinding 10](#_Toc18956)

[3. Study objectives and endpoints 10](#_Toc32722)

[3.1. Primary Objective and Related Endpoints 10](#_Toc1138)

[3.1.1. Primary objective 10](#_Toc29675)

[3.1.2. Primary Endpoint 10](#_Toc8164)

[3.2. Secondary Objectives and Related Endpoints 11](#_Toc5506)

[3.2.1. Secondary Objectives 11](#_Toc19966)

[3.2.2. Secondary Endpoints 11](#_Toc1720)

[3.3. Exploratory Objectives and Related Endpoints 12](#_Toc27501)

[3.3.1. Exploratory Objectives 12](#_Toc12368)

[3.3.2. Exploratory Endpoints 12](#_Toc27021)

[4. Statistical hypotheses 12](#_Toc17237)

[5. Sample size 13](#_Toc3568)

[6. Statistical Analysis Plan 13](#_Toc11513)

[6.1. Primary Analysis 13](#_Toc32576)

[6.2. End-of-study analysis 14](#_Toc13944)

[7. Analysis set 14](#_Toc4634)

[8. Statistical Analysis Methods 17](#_Toc6402)

[8.1. General Statistical Considerations 17](#_Toc7635)

[8.2. Data Handling 18](#_Toc19956)

[8.3. Subject Disposition Analysis 19](#_Toc8260)

[8.4. Demographic and Baseline Characteristics Analysis 19](#_Toc26094)

[8.5. Protocol Deviations 19](#_Toc28941)

[8.6. Vaccine Exposure 20](#_Toc17802)

[8.7. Medical History Based on the ITT set, subject medical history will be summarized by System Organ Class (SOC) and Preferred Term (PT) according to the Medical Dictionary for Regulatory Activities (MedDRA/C version 27.0). 20](#_Toc2040)

[8.8. Concomitant Medications and Vaccinations 20](#_Toc23732)

[8.9. Efficacy Analysis 20](#_Toc14171)

[8.9.1. Primary Vaccine Efficacy Analysis 20](#_Toc22017)

[8.9.2. Secondary Vaccine Efficacy Analysis 25](#_Toc688)

[8.9.3. Stratified Vaccine Efficacy Analysis 25](#_Toc25968)

[8.10. Immunogenicity Analysis 25](#_Toc15032)

[8.11. Safety Analysis 26](#_Toc23160)

[8.12. Exploratory Analyses 29](#_Toc5088)

[8.12.1. Evaluation of Vaccine Effect on Reducing ZBPI Scores in PHN 29](#_Toc30553)

[8.12.2. Evaluation of Vaccine Efficacy in Preventing PHN 29](#_Toc20687)

[9. Reference 30](#_Toc24572)

[10. Templates for Statistical Tables and Figures 30](#_Toc10807)

Abbreviation

| Abbreviation | Full Term |
| --- | --- |
| AE | Adverse Event |
| AESI | Adverse Events of Special Interest |
| AR | Adverse Reaction |
| ATC | Anatomical Therapeutic Chemical |
| BMI | Body Mass Index |
| CI | Confidence Interval |
| CRF | Case Report Form |
| CHO | Chinese Hamster Ovary |
| CRO | Contract Research Organization |
| E-PPS | Per-Protocol Set for Efficacy |
| FAS | Full Analysis Set |
| GMC | Geometric Mean Concentration |
| GMFI | Geometric Mean Fold Increase |
| HR | Hazard Ratio |
| HZ | Herpes Zoster |
| IDMC | Independent Data Monitoring Committee |
| IRR | Incidence Rate Ratio |
| ITT | Intent-To-Treat |
| I-FAS | Full Analysis Set for Immunogenicity |
| I-PPS | Per-Protocol Set for Immunogenicity |
| LZ901 | LZ901 |
| MedDRA | Medical Dictionary for Regulatory Activities |
| mITT | modified Intent-To-Treat Set |
| NMPA | National Medical Products Administration |
| PHN | Post-herpetic Neuralgia |
| PT | Preferred Term |
| SAE | Serious Adverse Event |
| SOC | System Organ Class |
| SOP | Standard Operation Procedure |
| SS | Safety Set |
| TEAE | Treatment Emergent Adverse Event |
| VE | Vaccine Efficacy |
| WHODD | WHO Drug Dictionary |
| ZBPI | Zoster Brief Pain Inventory |

1. Introduction

This Statistical Analysis Plan (SAP) is developed for 12 months after the full immunization analysis of the Phase III clinical trial conducted by Beijing Luzhu Biotechnology Co., Ltd., titled "A multicenter, randomized, blinded clinical, placebo-controlled, phase III clinical trial to evaluate the efficacy and safety of the recombinant zoster vaccine (CHO cells) LZ901 in subjects aged 40 years and older" (Protocol No.: LZ901-300). This SAP provides a detailed description of the statistical analysis contents and methodologies.

This Statistical Analysis Plan is based on Protocol Version 2.1 dated November 19, 2024, and Case Report Form (CRF) Version 2.0 dated July 10, 2024.

1. Study Overview
   1. Study Design

This clinical trial adopts a multicenter, randomized, double-blind, placebo-controlled design. The Phase III trial is being conducted across multiple provinces in China. The number of vaccine doses will be allocated to each study site based on the size of the randomized group. If subject enrollment in any province (for a specific age group or the overall population) falls behind, the enrollment targets for each province may be reallocated to allow other provinces to enroll more participants. This is to ensure that the total number of subjects specified in the protocol is fully and timely achieved.

The LZ901 trial includes a vaccine efficacy study and a lot-to-lot consistency study (immunogenicity subset).

LZ901-300 plans to enroll approximately 26,000 subjects aged ≥40 years, with around 6,000 aged 40–49, 9,000 aged 50–59, 9,000 aged 60–69, and 2,000 aged ≥70. Subjects will be stratified by study center and age group, and randomized in a 1:1 ratio into either the vaccine group or the placebo group. Approximately 3,000 of these subjects will be selected for inclusion in the immunogenicity subgroup. These participants will be randomly assigned in a 1:1:1:3 ratio to receive one of three vaccine lots or one placebo lot.

Subjects will receive two doses of the recombinant zoster vaccine (CHO cells)(code: LZ901 vaccine), developed by Beijing Luzhu Biotechnology Co., Ltd. and Luzhu Biopharmaceuticals (Zhuhai) Co., Ltd., or placebo, administered on a 0 and 30 day schedule.

For the lot-to-lot consistency trial (immunogenicity subgroup), approximately 3,000 subjects will be enrolled to assess lot consistency and undergo immunogenicity persistence follow-up.

The number of subjects in each group of the LZ901-300 study is shown in the table below:

| Age (years) | Experimental vaccine | | Placebo | | Total Target Number of Subjects |
| --- | --- | --- | --- | --- | --- |
| Total | Immunogenicity Subset* | Total | Immunogenicity Subset* |
| 40-49 | 3000 | 360 | 3000 | 360 | 6000 |
| 50-59 | 4500 | 500 | 4500 | 500 | 9000 |
| 60-69 | 4500 | 500 | 4500 | 500 | 9000 |
| ≥70 | 1000 | 140 | 1000 | 140 | 2000 |

*The immunogenicity subset accounts for approximately 12% of the total target enrollment.

- 1. Randomization

Subjects are randomized and assigned using a central randomization system.

- 1. Blinding and Unblinding
     1. Blinding

This study is designed as a double-blind study. Vaccine blinding will be performed by the randomization statistician along with other designated blinding personnel. Blinding personnel are prohibited from participating in any other aspects of this clinical trial and must not disclose the blinding information to any trial staff involved in the study.

An Independent Data Monitoring Committee (IDMC) will be established to conduct safety evaluations.

- - 1. Blinding Maintenance

A placebo-controlled design is used in this study. After serological results are obtained, even without direct access to the randomization code, it may be possible to infer a subject group assignment (study vaccine or placebo), leading to unintended unblinding. To maintain the blind, designated serological data management personnel will be responsible for handling serological result data. These individuals must not participate in any other aspects of the clinical trial and must not disclose any data that could potentially lead to unblinding to any personnel involved in the conduct of the study prior to official unblinding.

- - 1. Unblinding Procedures

In this study, after reaching the planned primary analysis time point, a blinded data review will be conducted. Upon confirmation of the data accuracy and reliability, the database will be locked. Unblinding will then be performed after database lock to enable primary analysis. At this unblinding, the assignment of each subject to either the study vaccine or placebo group will be revealed. The unblinding process will be initiated by the project statistician and, upon approval by the sponsor, the randomization statistician will release the randomization code to the project statistician. Prior to unblinding for the primary analysis, a blinding maintenance charter was established, specifying that only the statistical team, the clinical study report (CSR) writing team, and unblinded sponsor personnel are permitted access to the unblinded data (i.e., subject group assignments), while the rest of the project team remains blinded. For details, refer to the blinding maintenance charter.

After database lock for the 12-month post-vaccination analysis and upon sponsor approval, group assignment information may be disclosed to site staff and subjects who are **not** involved in the long-term efficacy or immunogenicity persistence assessments. However, for subjects participating in the evaluation of long-term efficacy or immunogenicity persistence, their treatment group information will continue to be blinded in accordance with the blinding maintenance charter established for the primary analysis. Upon completion of the 36-month post-vaccination efficacy follow-up for all subjects, including the collection and final adjudication of suspected HZ cases, the database will be locked, with sponsor approval, unblinding will be conducted.

If a cluster of adverse events occurs, or if the study is interrupted for any reason, unblinding may be conducted earlier upon mutual agreement between the sponsor and the investigators.

- - 1. Emergency Unblinding

During the study, individual emergency unblinding may only be conducted if a serious adverse event (SAE) occurs, the subject requires emergency rescue or treatment, and the product information is critical for the subject clinical management. In such cases, a researcher with unblinding authority at the study site should access the Clinflash IRT system to document the reason for unblinding and initiate emergency unblinding. The researcher must report the unblinding within 24 hours to the principal investigator or lead sub-investigator, promptly notify the sponsor and the sponsor designated CRO, and provide a written explanation to the sponsor.

The study will be terminated for the subject with the specific study number (while safety follow-up will continue), and the reason for termination should be documented in the case report form.

1. Study objectives and endpoints
   1. Primary Objective and Related Endpoints
      1. Primary objective

To evaluate the vaccine efficacy (VE) of the recombinant zoster vaccine (CHO cells) compared with placebo in preventing herpes zoster (HZ) 30 days after completion of the full vaccination in adults aged ≥40 years.

- - 1. Primary Endpoint

To calculate the vaccine efficacy by comparing the number of Herpes Zoster (HZ) efficacy endpoint cases (including laboratory-confirmed cases and clinically diagnosed cases as determined by the Clinical Endpoint Committee) occurring 30 days after completion of the full vaccination between the recombinant zoster vaccine (CHO cells) group and the placebo group.

*Vaccine Efficacy (VE) = (Rp – Rv) / Rp × 100%*

*Rp = Incidence rate (per person-year) in the placebo group*

*Rv = Incidence rate (per person-year) in the vaccine group*

- 1. Secondary Objectives and Related Endpoints
     1. Secondary Objectives

1. To evaluate the vaccine efficacy (VE) of the recombinant zoster vaccine (CHO cells) compared with placebo in preventing laboratory-confirmed herpes zoster (HZ) cases 30 days after completion of the full vaccination in adults aged ≥40 years.
2. To evaluate the safety of the recombinant zoster vaccine (CHO cells).
3. To evaluate the immunogenicity of the recombinant zoster vaccine (CHO cells) in the immunogenicity subset.
4. To evaluate the lot-to-lot consistency of immunogenicity among three batches of the recombinant zoster vaccine (CHO cells) in adults aged ≥40 years (in the immunogenicity subset).
   - 1. Secondary Endpoints
        1. **Vaccine Efficacy Endpoint**
5. To calculate the vaccine efficacy by comparing the incidence of laboratory-confirmed herpes zoster (HZ) cases, based on cases occurring 30 days after the full vaccination.
   - - 1. **Safety Endpoint**
6. Incidence of solicited adverse events (AE) within 0-7 days after each dose, including local (injection site) and systemic (non-injection site) reactions;
7. Incidence of unsolicited AEs within 0-30 days after each dos ;
8. Incidence of AEs within 30 minutes after each dose;
9. Incidence of adverse events of special interest (AESIs) from the first dose through 30 days after the full immunization;
10. Incidence of serious adverse events (SAEs) from the first dose through 12 months after the full immunization.
    - - 1. **Immunogenicity Endpoints (Immunogenicity Subset)**
11. The seroconversion rates of anti-gE antibodies 30 days after the full vaccination among the three different vaccine batches.
12. The geometric mean fold increase (GMFI) of anti-gE antibodies from Day 0 (pre-vaccination) to 30 days after the full vaccination among the three different vaccine batches.
13. The geometric mean concentration (GMC) ratios of anti-gE antibodies 30 days after the full vaccination among the three different vaccine batches.
    1. Exploratory Objectives and Related Endpoints
       1. Exploratory Objectives
14. To evaluate the effect of the recombinant zoster vaccine (CHO cells) in reducing the severity of post-herpetic neuralgia (PHN) among herpes zoster (HZ) efficacy endpoint cases in adults aged ≥40 years.
15. To evaluate the vaccine efficacy of the recombinant zoster vaccine (CHO cells) compared with placebo in preventing the occurrence of post-herpetic neuralgia (PHN) among herpes zoster (HZ) efficacy endpoint cases in adults aged ≥40 years.
16. To evaluate the persistence of immunogenicity at 12 months, 24 months, and 36 months after the full vaccination with the recombinant zoster vaccine (CHO cells) in adults aged over 40 years (in the immunogenicity subset).
    - 1. Exploratory Endpoints
17. To evaluate the effect of the recombinant zoster vaccine (CHO cells) in reducing the Zoster Brief Pain Inventory (ZBPI) scores for post-herpetic neuralgia (PHN) among herpes zoster (HZ) efficacy endpoint cases in adults aged ≥40 years.
18. To evaluate the effect of the recombinant zoster vaccine (CHO cells) compared with placebo in reducing the incidence of PHN (ZBPI score ≥0), severe PHN (ZBPI score ≥3), and severe herpes zoster-related acute pain (ZBPI score ≥3) among herpes zoster (HZ) efficacy endpoint cases in adults aged ≥40 years.
19. Immunogenicity persistence (at 12 months, 24 months, and 36 months after the full vaccination):

- Geometric mean concentrations (GMCs) and seroconversion rates of anti-gE antibodies;
- Geometric mean fold increases (GMFIs) of anti-gE antibodies compared with pre-vaccination levels.

1. Statistical hypotheses

This study includes one primary endpoint hypothesis (vaccine efficacy hypothesis) and one secondary endpoint hypothesis (lot-to-lot consistency hypothesis). The vaccine efficacy hypothesis will be tested first. If the null hypothesis for vaccine efficacy is rejected, the lot-to-lot consistency hypothesis will subsequently be tested.

Vaccine efficacy hypothesis testing: The hypothesis is that, in subjects aged 40 years and older who receive two doses of the study vaccine according to a 0 and 30 day immunization, the lower bound of the 95% confidence interval (CI) for vaccine efficacy (VE) against confirmed HZ endpoint cases at 30 days after the full vaccination is greater than 25%. The null hypothesis is that the lower bound of the 95% CI for VE is less than or equal to 25%, that is:

- H₀ : The lower bound of the 95% confidence interval (CI) for vaccine efficacy (VE) is ≤ 25%.
- H₁ : The lower bound of the 95% CI for vaccine efficacy (VE) is > 25%.
- Lot-to-Lot Consistency Hypothesis Testing: The hypothesis is that the geometric mean concentrations (GMCs) of anti-gE antibodies at 30 days after the full vaccination are equivalent among the three different lots of the study vaccine, based on pairwise comparisons. The statistical hypotheses are as follows:
- H₀: For at least one pairwise comparison between vaccine lots, the GMC ratio is ≤ 0.67 or ≥ 1.5.
- H₁ : For all pairwise comparisons between vaccine lots, the GMC ratios are > 0.67 and < 1.5.

1. Sample size

Vaccine Efficacy Testing: In this study, it is assumed that the expected vaccine efficacy (VE) will reach 65%, with a 1:1 allocation ratio between the vaccine group and the placebo group. Using a one-sided significance level of 0.025 and achieving approximately 95% statistical power, the study aims for the lower bound of the 95% confidence interval (CI) for VE to be greater than 25%. At least 103 confirmed herpes zoster (HZ) endpoint cases must be observed for the primary analysis. Assuming an annual incidence rate of HZ of approximately 8‰ in the placebo group during the observation period, a non-completion rate of about 8% for the full vaccination, and an annual dropout rate of approximately 15%, the study plans to enroll approximately 26,000 subjects (about 13,000 subjects per group). This study adopts a case-driven design based on clinically or laboratory-confirmed HZ cases.

Lot-to-Lot Consistency Testing: Assuming that the geometric mean concentration (GMC) ratios of anti-gE antibodies at 30 days after the full vaccination between each pair of the three vaccine lots are equal to 1, with a coefficient of variation (CV) of 2.5, a one-sided significance level of 0.025, and each lot having 425 evaluable subjects, the study will have greater than 90% statistical power to demonstrate lot-to-lot consistency. Considering an approximate dropout rate of 15%, 500 subjects per lot will be enrolled.

1. Statistical Analysis Plan
   1. Primary Analysis

In subjects included in the Efficacy Per-Protocol Set — excluding (1) subjects from the Total Vaccinated Cohort who did not receive the second dose or developed HZ within 30 days after the second dose; and (2) subjects with protocol deviations that significantly impact the efficacy evaluation (data prior to the deviation may still be included in the analysis) — once at least 103 valid endpoint cases have been accumulated, along with safety data covering at least 6 months after full immunization and immunogenicity results from the immunogenicity subset (measured before the first dose and 30 days after full immunization), and after the completion of data entry, cleaning, and database lock for this portion, statistical analyses of efficacy, safety, and immunogenicity will be conducted.The resulting data will be submitted to the NMPA for regulatory review.

- 1. End-of-study analysis

After all subjects have completed safety follow-up for 12 months post full immunization, the immunogenicity subset has completed 36 months of follow-up, and data collection for suspected HZ cases, safety outcomes, as well as immunogenicity results at 12, 24, and 36 months post full immunization have been obtained, and after the completion of data entry, cleaning, and database lock for this portion, statistical analyses of HZ protective efficacy, safety, and immunogenicity will be conducted. A final clinical study report will be prepared based on these analyses and submitted to the NMPA as a supplemental report for the Phase III clinical trial.

1. Analysis set

**The Intent-to-Treat (ITT)** analysis set includes all randomized subjects.

**The modified Intent-to-Treat Set (mITT)** includes all subjects who followed the ITT principle, were randomized, and received at least one dose of the study vaccine.

**The Per-Protocol Set for Efficacy (E-PPS)** includes all subjects who met the inclusion/exclusion criteria, were randomized, and completed the full vaccination, excluding: (1) subjects in the vaccination cohort who did not receive the second dose or had a confirmed HZ case within 30 days after the second dose; and (2) subjects with protocol deviations that would significantly impact the efficacy assessment (data collected before the deviation may still be included in the analysis).

Subjects meeting any of the following criteria will be excluded from the Efficacy Per-Protocol Set (E-PPS):

- Did not complete the full vaccination;
- Received the second dose outside the specified window period (−2/+14 days), i.e., the dosing interval (date of second dose − date of first dose) was >44 days or <28 days;
- Were diagnosed with HZ (either laboratory-confirmed or clinically diagnosed) between the first dose and within 30 days after the second dose. The interval is determined based on both the date and time of the second dose and the onset of the HZ case, accurate to the hour; if the interval is less than 30 days, the subject will be excluded;
- Received another zoster vaccine between the first dose and within 30 days after the second dose;
- Underwent emergency or accidental unblinding between the first dose and within 30 days after the second dose;
- Used prohibited medications or vaccines that could significantly affect vaccine efficacy evaluation between the first dose and within 30 days after the second dose;
- Received at least one dose from an incorrect treatment group. (However, if both doses were from the same incorrect group, the subject may still be included in the E-PPS and analyzed according to the actual treatment received.);
- Withdrew from the study or died between the first dose and within 30 days after the second dose;
- Had no efficacy endpoint monitoring visits after 30 days following the second dose;
- Were determined during the blinded data review meeting (prior to database lock) by consensus of the principal investigator, sponsor, and project team to have experienced other protocol deviations between screening and 30 days after the second dose that significantly impact efficacy evaluation.

**The Full Analysis Set for Immunogenicity Persistence (IP-FAS)** includes all subjects in the immunogenicity subset who followed the ITT principle, were randomized, completed the full vaccination, and had available immunogenicity results at least once among the time points of 12 months, 24 months, or 36 months after the full vaccination, in addition to the pre-vaccination result. Subjects who received the incorrect vaccine were evaluated according to their originally randomized group for immunogenicity assessments.

**The Per-Protocol Set for Immunogenicity Persistence (IP-PPS)** includes all subjects in the immunogenicity subset who met the inclusion/exclusion criteria, were randomized, completed the full vaccination, and had available immunogenicity results at least once among the time points of 12 months, 24 months, or 36 months after the full vaccination, in addition to the pre-vaccination result, excluding subjects with protocol deviations that could significantly impact the immunogenicity evaluation (data collected prior to the protocol deviation may still be included in the analysis).

Subjects meeting any of the following criteria will be excluded from the Immunogenicity Per-Protocol Set (I-PPS):

- Did not complete the full vaccination;
- Received the second dose outside the specified window period (−2/+14 days), i.e., the dosing interval (date of second dose − date of first dose) was >44 days or <28 days;
- The blood sample collected at 30 days after the second dose fell outside the allowed window (−2/+30 days), i.e., the interval (date of 30-day post-second dose blood draw − date of second dose) was >60 days or <28 days;
- Were diagnosed with HZ (either laboratory-confirmed or clinically diagnosed) between the first dose and the 30-day post-vaccination blood sampling. The determination is based on both the date and time of sample collection and the onset of the HZ case, accurate to the hour. If the case onset occurs before the blood sampling, the subject will be excluded;
- Received another zoster vaccine between the first dose and the 30-day post-vaccination blood sampling;
- Underwent emergency or accidental unblinding between the first dose and the 30-day post-vaccination blood sampling;
- Used prohibited medications or vaccines that could significantly affect the immunogenicity assessment between the first dose and the 30-day post-vaccination blood sampling;
- Received at least one dose from an incorrect treatment group. (However, if both doses were from the same incorrect group, the subject may still be included in the I-PPS and analyzed according to the actual treatment received);
- Had missing immunogenicity results at either baseline (pre-vaccination) or 30 days after the full vaccination;
- Were determined during the blinded data review meeting (prior to database lock) by consensus of the principal investigator, sponsor, and project team to have experienced other protocol deviations between the first dose and the 30-day post-vaccination blood sampling that significantly impact the immunogenicity evaluation.

**The Safety Set (SS)** includes all subjects who received at least one dose of the study vaccine. Subjects who received the incorrect vaccine were evaluated according to their originally randomized group.
In this study, the safety analysis for each dose will be based on the actual number of subjects who received the corresponding vaccination. Specifically, the Safety Set for Dose 1 includes all randomized subjects who received the first dose of the study vaccine, and the Safety Set for Dose 2 includes all randomized subjects who completed the second dose of the study vaccine.
The final definitions of the analysis sets will be determined during the data blind review meeting, through joint discussion among the principal investigators, the sponsor, the statistical team, and the data management team, prior to database lock.

1. Statistical Analysis Methods
   1. General Statistical Considerations

In the statistical listings, the subject screening number will serve as the unique identifier for each subject throughout the study. All statistical analyses will be performed using SAS software version 9.4 or later.

General Principles for Statistical Descriptions: For continuous variables, descriptive statistics will include mean, median, standard deviation, maximum, minimum, upper quartile, and lower quartile. For categorical or ordinal variables, data will be summarized using frequency counts and percentages. For immunogenicity endpoints, antibody levels will be summarized using geometric mean, median, maximum, minimum, and 95% confidence intervals (CIs). Statistical analyses of antibody levels will be performed after log transformation of the data.

Unless otherwise specified, the number of decimal places used when presenting results will follow the conventions below:

| Rules | Description |
| --- | --- |
| Decimal Places for Summary Statistics | General Rule: Relative to the number of decimal places in the raw data, the mean, confidence interval limits, median, upper quartile, and lower quartile will be presented with one additional decimal place. The standard deviation or standard error will be presented with two additional decimal places. The minimum and maximum values will retain the same number of decimal places as the raw data. Do not exceed four decimal places in any case. Certain laboratory parameters or other data types may require appropriate adjustments to this rule. |
| Percentage Format | Percentages will be displayed with two decimal places. For very small percentages, additional decimal places may be used as appropriate. |

General Principles for Statistical Inference: Appropriate statistical models will be selected based on the characteristics of the data. Unless otherwise specified, all statistical tests will be two-sided. A p-value less than 0.05 will be considered statistically significant (unless otherwise noted). P-values will be presented to four decimal places. If the p-value is less than 0.0001, it will be displayed as "<0.0001"; if greater than 0.9999, it will be displayed as ">0.9999".

Baseline is defined as the last non-missing value prior to the first administration of the study vaccine. For randomized subjects who did not receive the study vaccine, baseline is defined as the last non-missing value prior to randomization.

- 1. Data Handling

**Start or End Date of Adverse Events**

If the start or end date of an adverse event (AE) is missing or incomplete, imputation will be performed according to the following rules. AE date imputations are conducted only for the purpose of classifying the time period during which the AE occurred. In AE data listings, the original un-imputed dates will still be displayed.

Imputation Rules for AE Start Dates:

- If the AE start date is completely missing, it will be imputed as the date of first administration of the study vaccine.
- If the AE start date is partially missing:
- If year and month are known, and they are the same as the year and month of the first vaccination, the AE start date will be imputed as the date of first vaccination.
- If year and month are known, but they differ from the year and month of the first vaccination, the AE start date will be imputed as the first day of that month.
- If only the year is known, and it is the same as the year of the first vaccination, the AE start date will be imputed as the date of first vaccination.
- If only the year is known, and it differs from the year of the first vaccination, the AE start date will be imputed as January 1st of that year.

Imputation Rules for AE End Dates:

- If year and month are known, the AE end date will be imputed as the last day of that month.
- If only the year is known, the AE end date will be imputed as December 31st of that year.
- If the AE end date is completely missing, no imputation will be performed.

If the imputed AE end date is later than the study completion date, the study completion date will be used as the imputed AE end date.

**Onset Date of Suspected Case**

If the onset date of a suspected case is incomplete but can be determined based on available information to have occurred after 30 days following full immunization, the following imputation rules will apply:

- If both year and month are known, the onset date will be imputed as the first day of that month.
- If only the year is known, the onset date will be imputed as January 1st of that year.

If the onset date of a suspected case is incomplete or missing and it cannot be determined from the available information whether the case occurred after 30 days following full immunization, the case will be discussed during the blinded data review meeting prior to database lock.

**Start or End Date of Concomitant Medication**

If the start or end date of a concomitant medication is incomplete, and the available information is insufficient to determine whether the medication was used exclusively before or after the date of first administration of the study vaccine, the medication will be considered as having been used both before and after the first vaccination date.

**Start or End Date of Medical History**

If the start or end date of a medical history entry is incomplete, no imputation will be performed.

- 1. Subject Disposition Analysis

A descriptive summary will be provided for the distribution of subjects enrolled in the study at each center and overall, covering the entire process from screening to study completion.

Based on the ITT set, the number and percentage of subjects will be summarized for the following: randomized but not vaccinated, vaccinated with one dose of the study vaccine after randomization, completed full vaccination, reasons for not completing vaccination, subjects who withdrew from the study, and reasons for withdrawal.

Based on the ITT set, the number and percentage of subjects included in each analysis set will also be summarized.

A subject disposition flowchart will be generated.

- 1. Demographic and Baseline Characteristics Analysis

Descriptive statistical analyses of demographic characteristics (e.g., age, sex, ethnicity, height, weight, body mass index [BMI], etc.) and other baseline characteristics (e.g., history of varicella or herpes zoster vaccination) will be performed by treatment group based on the ITT, E-PPS, I-PPS, and SS sets.

For qualitative (categorical) data, the number and percentage of subjects in each category will be calculated. For quantitative (continuous) data, summary statistics including mean, standard deviation, median, upper quartile, lower quartile, minimum, and maximum will be presented.

For age, in addition to descriptive statistics as a continuous variable, the number and percentage of subjects in each age group (40–49 years, 50–59 years, 60–69 years, and ≥70 years) will also be calculated. For sex, in addition to summarizing the number and percentage of males and females in the overall population, the number and percentage of males and females within each age group will also be summarized.

- 1. Protocol Deviations

Protocol deviations will be summarized based on the ITT set.

Protocol deviations leading to exclusion of subjects from the Efficacy Per-Protocol Set will be summarized based on the m-ITT2 set.

Protocol deviations leading to exclusion of subjects from the Immunogenicity Per-Protocol Set will be summarized based on the I-FAS set.

- 1. Vaccine Exposure

Vaccination data will be summarized based on the Safety Set (SS), including the number of subjects vaccinated, the interval between the two doses of the study vaccine, overall study follow-up time, and follow-up time after the second dose.

The interval between the two doses of the study vaccine is defined as: Date of second dose − Date of first dose.

Study follow-up time is defined as the duration from the date of first vaccination to the date of study completion or withdrawal.

Follow-up time after the second dose is defined as the duration from the date of the second vaccination to the date of study completion or withdrawal.

- 1. Medical History
     Based on the ITT set, subject medical history will be summarized by System Organ Class (SOC) and Preferred Term (PT) according to the Medical Dictionary for Regulatory Activities (MedDRA/C version 27.0).
  2. Concomitant Medications and Vaccinations

The analysis will be performed based on the Safety Set (SS).
Concomitant medications and vaccinations will be coded using WHO Drug GLOBAL (B3) C [V2024MAR]. The number and percentage of subjects using each type of medication and vaccine (preferred drug name under ATC Level 2 – Anatomical System) will be calculated separately.

- 1. Efficacy Analysis
     1. Primary Vaccine Efficacy Analysis

**Primary Endpoint:** Based on the number of confirmed HZ endpoint cases occurring 30 days after the full immunization (including both laboratory-confirmed and clinically confirmed cases as adjudicated by the Endpoint Adjudication Committee), the vaccine efficacy will be calculated in comparison to the placebo group.

Vaccine Efficacy (VE) will be calculated as: VE = (Rp – Rv) / Rp × 100%

Rp = Incidence rate (per person-year) in the placebo group

Rv = Incidence rate (per person-year) in the vaccine group

**（1）Target Variable：**The incidence rate of confirmed HZ endpoint cases per person-year of exposure, starting from 30 days after the full immunization.

Definition of person-years of exposure: Exposure days after the full immunization divided by 365.25.
Exposure days after the full immunization = End date of HZ endpoint case surveillance – Start date of HZ endpoint case surveillance + 1.

Start date of HZ endpoint case surveillance = Date of completion of full immunization + 30 days.

i. The end date of HZ endpoint case surveillance is defined as follows: For subjects who develop a confirmed HZ endpoint case after 30 days following the full immunization and who have not experienced emergency/accidental unblinding or protocol deviations that significantly impact the evaluation of vaccine efficacy prior to the occurrence of the first confirmed HZ endpoint case:
The end date of HZ endpoint case surveillance is the onset date of symptoms of the first confirmed HZ endpoint case.

ii. For subjects who did not develop a confirmed HZ endpoint case, or who experienced emergency/accidental unblinding or protocol deviations significantly affecting vaccine efficacy evaluation prior to the occurrence of the first confirmed HZ endpoint case:
The end date of HZ endpoint case surveillance is defined as the earliest of the following dates:

the date of emergency/accidental unblinding, the date of protocol deviation significantly impacting vaccine efficacy evaluation, the date of the last endpoint case surveillance assessment, the date of study withdrawal or the date of death.

**(2) Treatment:**

- Vaccine group: Recombinant zoster vaccine (CHO cells)
- Control group: Placebo

Immunization schedule: Subjects in both the vaccine and placebo groups will receive the study vaccine or placebo at Day 0 and Day 30, respectively.

**(3) Analysis Set, Concomitant Events and Handling Strategy, and Population-Level Summarization:**

Estimation Target, Population, Concomitant Events, and Handling Strategy:

| Estimation Target | Analysis | Population | Concomitant Events and Handling Strategy | Population-Level Summary | Handling of Missing Data |
| --- | --- | --- | --- | --- | --- |
| Primary Estimation Target | Primary Analysis | E-PPS-eligible subjects | Emergency/Accidental Unblinding: On-Treatment Strategy  Data handling method under the on-treatment strategy: Only data collected prior to the occurrence of the concomitant event will be used for analysis. | Vaccine efficacy will be analyzed using a Poisson regression model to estimate the incidence rate per person-year and the corresponding 95% confidence intervals (CIs) for both the vaccine and placebo groups, the incidence rate ratio (IRR) between the two groups, and the vaccine efficacy (VE) along with its 95% CI. VE = 100 × (1 − IRR). | No imputation will be performed for missing values. |
| Sensitivity Analysis 1 | Vaccine efficacy will also be estimated using a Cox proportional hazards model, by calculating the hazard ratio (HR) of the vaccine group relative to the placebo group and its 95% confidence interval (CI), along with the vaccine efficacy (VE) and its 95% CI. VE = 100 × (1 − HR). | No imputation will be performed for missing values. |
| Sensitivity Analysis 2 | Vaccine efficacy without considering surveillance time will be calculated as: VE = (Incidence rate in the placebo group − Incidence rate in the vaccine group) / Incidence rate in the placebo group  Incidence rate in the placebo group = Number of confirmed HZ endpoint cases after 30 days post-full immunization in the placebo group / Number of subjects in the placebo group  Incidence rate in the vaccine group = Number of confirmed HZ endpoint cases after 30 days post-full immunization in the vaccine group / Number of subjects in the vaccine group | No imputation will be performed for missing values. |

**Poisson Regression Model:**
The variables in the Poisson regression model are as follows:

- Response variable: Occurrence of the primary endpoint event (Yes/No)
- Independent variable: Treatment group
- Offset variable: Log-transformed number of exposure days after 30 days post full immunization (in days)

The Poisson regression model will provide the following summary results:

- Incidence rate per person-year and 95% confidence interval (CI) for the vaccine and placebo groups
- Incidence rate ratio (IRR) between the vaccine and placebo groups
- Vaccine efficacy (VE) and its 95% CI, calculated as: VE = 100 × (1 − IRR)

**Cox Proportional Hazards Model:**
The variables in the Cox proportional hazards model are as follows:

- Response variable – Event: Occurrence of the primary endpoint event (Yes/No)
- Response variable – Time: Number of exposure days after 30 days post full immunization (in days)
- Independent variable: Treatment group

The Cox regression model will provide the following summary results:

- Hazard ratio (HR) for the vaccine group relative to the placebo group for the occurrence of the primary endpoint event
- Vaccine efficacy (VE) and its 95% confidence interval (CI), calculated as: VE = 100 × (1 − HR)

Vaccine efficacy is considered to be demonstrated if the lower bound of the 95% confidence interval for VE is greater than 25%.

- - 1. Secondary Vaccine Efficacy Analysis

**Secondary Endpoint:** Based on laboratory-confirmed HZ cases, vaccine efficacy 30 days after the full immunization will be calculated in comparison with the placebo group.

**Target Variable:** Incidence rate of laboratory-confirmed HZ cases per person-year starting from 30 days after the full immunization.

The analysis method for the secondary vaccine efficacy endpoint will be the same as that used for the primary vaccine efficacy endpoint.

- - 1. Stratified Vaccine Efficacy Analysis
       1. **Vaccine efficacy will be analyzed stratified by age group**

Based on the E-PPS, both the primary and secondary vaccine efficacy endpoints will be analyzed by age group (40–49, 50–59, 60–69, and ≥70 years).
The analysis method will be the same as that used for the primary vaccine efficacy endpoint.

- - - 1. **Vaccine Efficacy – Additional Stratified Analyses**

Based on the E-PPS, the primary vaccine efficacy endpoint will be analyzed stratified by the following subgroups:

- Study center group (Jiangsu, Shandong, Hubei, and Shanxi)
- Sex
- History of chronic diseases

The analysis method will be the same as that used for the primary analysis of the primary vaccine efficacy endpoint.

- 1. Immunogenicity Analysis

Immunogenicity analysis will primarily be based on the Immunogenicity Per-Protocol Set (I-PPS).

A covariance analysis model (ANCOVA) will be fitted to the log-transformed anti-gE antibody levels at 30 days after the full immunization for subjects in the immunogenicity subset across the three different vaccine batches and the placebo group. In the model, the log-transformed post-vaccination antibody level will be the dependent variable; the log-transformed baseline antibody level will be included as a covariate; and treatment group and age group will be included as fixed effects. The model will provide the following outputs: Log-transformed geometric mean concentration (GMC) and its 95% confidence interval (CI) for each group and for the pooled vaccine batches at 30 days post full immunization; Least squares mean differences and their 95% CIs for pairwise comparisons among the three vaccine batches; Least squares mean difference and its 95% CI for the comparison between the pooled vaccine group (three batches combined) and the placebo group. After back-transformation, the following will be obtained: GMC and its 95% CI for each group and for the pooled vaccine batches; Adjusted GMC ratios and their 95% CIs for pairwise comparisons among the three vaccine batches; GMC ratio and its 95% CI for the comparison between the pooled vaccine group and the placebo group (pooled vaccine group/placebo group). Additionally, the test statistic and p-value for batch-to-batch consistency will be calculated, as well as the p-value for the comparison of GMC between the pooled vaccine group and the placebo group.

If the lower limit of the 95% confidence intervals for the pairwise GMC ratios among the three different vaccine batches at Day 30 post-full immunization is greater than 0.67, and the upper limit is less than 1.5, the batch-to-batch consistency of the study vaccine will be considered demonstrated.

The geometric mean fold increase (GMFI) in anti-gE antibody levels from Day 0 (pre-vaccination) to Day 30 post full immunization will be calculated for each of the three individual vaccine batches, the pooled vaccine group (combining the three batches), and the placebo group. First, each subject fold increase in antibody level will be calculated. The fold increase values will then be log-transformed, and the arithmetic mean and 95% confidence interval of the log-transformed values will be calculated by group. After back transformation, the GMFI and its 95% confidence interval will be obtained for each group. A t-test on the log transformed values will be used to compare the pooled vaccine group with the placebo group, and the p-value will be calculated.

Seropositivity is defined as a serum varicella-zoster virus (VZV) glycoprotein E (gE)-specific antibody concentration ≥ 0.1 IU/mL (or 100 mIU/mL). The proportion of subjects with seropositive antibodies before and after immunization is referred to as the seropositivity rate. Seroconversion is defined as a ≥4-fold increase in antibody concentration after immunization compared to pre-immunization levels. The percentage of subjects who achieve seroconversion after immunization is referred to as the seroconversion rate. For each of the three individual vaccine batches, the three batches of the vaccine group were combined, and the placebo group, the seropositivity rate before immunization and at Day 30 post full immunization, as well as the Day 30 seroconversion rate, will be calculated. The 95% confidence intervals for these rates will be calculated using the Clopper-Pearson method. The Chi-square test will be used to compare differences between the combined three batches of the vacine group and the placebo group, and the corresponding p-values will be calculated.

For seronegative subjects at baseline, the geometric mean concentration (GMC) and fold increase at Day 30 post full immunization will be descriptively summarized. Similarly, for seropositive subjects at baseline, the GMC and fold increase at Day 30 post full immunization will also be summarized. The GMFI and its 95% confidence interval will be calculated for both the combined three batches of the vacine group and the placebo group.

In addition, the GMC, GMFI, seropositivity rate, and seroconversion4-fold increased rate at 30 days after the full immunization, along with their corresponding 95% confidence intervals, will also be calculated by age group (40–49, 50–59, 60–69, and ≥70 years).

Box plots of anti-gE antibody levels before vaccination and at 30 days post full immunization will be generated separately for each of the three individual vaccine batches and the placebo group.

- 1. Safety Analysis

Adverse events and adverse reactions will be analyzed based on the Safety Set (SS).
Symptoms directly associated with confirmed HZ endpoint cases occurring within 30 days after the full vaccination will not be included as adverse events in the safety analysis.

This study primarily focuses on the statistical analysis of treatment-emergent adverse events (TEAEs) that occur after administration of the study vaccine. Solicited adverse events will be categorized and summarized by systemic and local reactions. Unsolicited adverse events, adverse events of special interest (AESIs), and serious adverse events (SAEs) will be classified and summarized by System Organ Class (SOC) and Preferred Term (PT). Adverse events that occurred prior to vaccination will be listed in a separate table. Unless otherwise specified, the term “adverse event” refers to TEAEs.

For subjects who received different study groups for the two doses, solicited AEs will be analyzed based on the most recent vaccination group prior to the AE onset. For other types of AEs, if the AE occurred after receiving the LZ901 vaccine, the event will be summarized under the LZ901 group; if the AE occurred after receiving only the placebo, the event will be summarized under the placebo group.

If the start or end date of an adverse event (AE) is missing or incomplete, it will be imputed according to the imputation rules described in Section 8.2. The imputed dates will be used solely for categorizing the timing of AEs; the original (unimputed) dates will be displayed in the AE data listings.

For the analysis of the relationship between AEs and vaccination, AEs assessed as "definitely related," "probably related," "possibly related," or with missing causality assessment will be considered related to the study vaccine. AEs assessed as "possibly unrelated" or "definitely unrelated" will be considered not related to the study vaccine. If a single AE is associated with more than one causality assessment, the strongest relationship will be used in the summary. AEs related to the study vaccine are also referred to as adverse reactions (ARs).

The following rules will be applied for the summary of adverse events (AEs): (1) If a subject experiences multiple occurrences of AEs within the same System Organ Class (SOC) or Preferred Term (PT), or multiple occurrences of the same solicited AE, the subject will be counted only once in the incidence count for that SOC, PT, or solicited AE category. (2) If a subject experiences the same AE multiple times (i.e., same SOC and PT or same solicited AE), the maximum severity grade among all occurrences will be used for the severity analysis. (3) If the severity grade is missing for all occurrences of the same AE in a subject, the AE will be counted as Grade 3 by default.

AE summary tables will be sorted in descending order of incidence in the study vaccine group, with priority given to SOC-level incidence. Within each SOC, PTs will also be sorted by descending incidence. If the incidence is the same in the study group, sorting will then be based on descending incidence in the placebo group following the same criteria. If the incidence remains the same, sorting will follow the alphabetical order of the pinyin (Chinese phonetic spelling) of the PT.

**All TEAEs**

The number of events, number of subjects, and incidence rate will be calculated separately for the study vaccine group and the placebo group for: all adverse events (AEs), AEs related to the study vaccine, and AEs not related to the study vaccine. In addition, for each group and each dose, the number of events, number of subjects, and incidence rate will be calculated for AEs occurring within different post-vaccination time intervals (within 30 minutes, Day 0–7, Day 8–30, and Day 0–30), by severity, for Grade ≥2 and Grade ≥3 AEs, as well as for solicited and unsolicited AEs.

All AEs occurring within 30 minutes, Day 0–7, Day 8–30, and Day 0–30 after each vaccination will be summarized by treatment group, System Organ Class (SOC), and Preferred Term (PT).

**Solicited Adverse Event、Adverse Reaction**

Solicited adverse events (AEs) and solicited adverse reactions (ARs) occurring within 0–7 days after each dose will be categorized and summarized by treatment group and vaccination dose. Events will be classified by injection site (local) and non-injection site (systemic), as well as by symptom and severity grade.

Local solicited adverse events include: pain, pruritus, induration, swelling, rash, and erythema.
Systemic solicited adverse events include: malaise, fatigue, fever, headache, insomnia, myalgia, abnormal skin/mucosa, pain at non-injection site, diarrhea, constipation, vomiting, nausea, acute allergic reaction, arthritis, and arthralgia.

Local solicited adverse events will be analyzed separately as adverse events and adverse reactions. For each subject, different local adverse events or adverse reactions will be aggregated into a single combined local adverse event or combined local adverse reaction, with the maximum severity grade among all local events or reactions used as the overall severity.

Systemic solicited adverse events will be analyzed separately as adverse events and adverse reactions. For each subject, all systemic adverse events or adverse reactions will be aggregated into a single combined systemic adverse event or combined systemic adverse reaction, with the maximum severity grade among all systemic events or reactions used as the overall severity.

For each subject, all solicited adverse events or adverse reactions will be aggregated into a single combined solicited adverse event or combined solicited adverse reaction, with the maximum severity grade among all solicited events or reactions used as the overall severity.

In addition to severity grading, solicited AEs and ARs will also be summarized by the number and proportion of Grade ≥2 and Grade ≥3 events.

The duration of solicited AEs and ARs will be summarized by dose.

The 95% confidence intervals for rates will be calculated using the Clopper-Pearson method. Group comparisons will be performed using the Chi-square test or Fisher exact test.

**Unsolicited Adverse Event、Adverse Reaction**

All unsolicited adverse events (AEs) and unsolicited adverse reactions (ARs) will be coded using MedDRA (Medical Dictionary for Regulatory Activities).

The overall incidence of unsolicited adverse events (AEs) and unsolicited adverse reactions (ARs) occurring within 30 days after the first and second doses will be described by treatment group. The number of events, number of subjects, and incidence rate will be calculated by severity level. The proportion of subjects experiencing Grade ≥3 unsolicited AEs or ARs will also be calculated.

Unsolicited AEs and ARs will be summarized by System Organ Class (SOC) and Preferred Term (PT) using standard MedDRA classification.

The 95% confidence intervals for incidence rates will be calculated using the Clopper-Pearson method. Group comparisons will be conducted using the Chi-square test or Fisher Exact Test.

**AESI and SAE**

From the first dose to 30 days after the full vaccination, adverse events of special interest (AESIs); from the first dose to 6 months and 12 months after full vaccination, serious adverse events (SAEs) will be summarized. The summary will be conducted by treatment group, relationship to the study vaccine, severity, and categorized by System Organ Class (SOC) and Preferred Term (PT). The number of events, number of subjects affected, and incidence rates will be presented.

The 95% confidence intervals for the incidence rates will be calculated using the Clopper-Pearson method. Between-group comparisons will be conducted using the Chi-square test or Fisher’s exact test, as appropriate.

**Stratified Analysis by Age Group**
The above adverse events (AEs) will be analyzed by age group (40–49 years, 50–59 years, 60–69 years, and ≥70 years).

**Other Safety Assessments**
Deaths and pregnancy data will be summarized and listed based on the Safety Set (SS).

- 1. Exploratory Analyses
     1. Evaluation of Vaccine Effect on Reducing ZBPI Scores in PHN

Based on the Efficacy Per-Protocol Set (E-PPS), ZBPI scores for PHN among herpes zoster (HZ) confirmed endpoint cases in the vaccine and placebo groups will be descriptively summarized. Summary statistics will include the mean, median, maximum, minimum, upper quartile, and lower quartile. The Wilcoxon rank-sum test will be used to compare score distributions between groups.

The incidence rates of PHN (ZBPI score ≥ 0), severe PHN (ZBPI score ≥ 3), and severe acute-phase HZ-related pain (ZBPI score ≥ 3) among HZ confirmed endpoint cases in the vaccine and placebo groups will be calculated, along with their 95% confidence intervals using the Clopper-Pearson method. The rate difference between the vaccine and placebo groups and its 95% confidence interval will be calculated using the Miettinen and Nurminen method. The differences in incidence rates between the two groups will be compared using the Chi-square test or Fisher’s exact test, as appropriate.

- - 1. Evaluation of Vaccine Efficacy in Preventing PHN

Based on the Efficacy Per-Protocol Set (E-PPS), the protective efficacy of the study vaccine in preventing the occurrence of PHN among HZ confirmed endpoint cases aged ≥40 years will be evaluated in comparison with the placebo group.

The incidence rates of PHN among HZ confirmed endpoint cases will be calculated separately for the vaccine and placebo groups. The reduction in PHN incidence in the vaccine group compared to the placebo group will be calculated to determine the vaccine efficacy in preventing PHN among HZ confirmed endpoint cases.

1. Reference

Jennison, C., & Turnbull, B. W. (1999). Group Sequential Methods with Applications to Clinical Trials. CRC.

Kalbfleisch , J. D., & Prentice , R. L. (2002). The Statistical Analysis of Failure Time Data. Wiley-Interscience.

Clopper CJ, Pearson E. The Use of Confidence or Fiducial Limits Illustrated in the case of

the Binomial. Biometrika. 1934;26:404-413

Miettinen OS, Nurminen M. Comparative analysis of two rates. Statistics in Medicine 1985;4:213-226

1. Templates for Statistical Tables and Figures

Refer to the attachment: <LZ901-300_Statistical_Tables_and_Figures_Templates_V2.0_20250328.pdf>.
