# Supplementary material
Source: Research Square preprint supplement (doi:10.21203/rs.3.rs-9064014/v1)
Supplement: Supplementary file 2 [file 6ee20ce054d604cb51a8465b.docx]

**A multicenter, randomized, blinded clinical, placebo-controlled, phase III clinical trial to evaluate the efficacy and safety of the recombinant zoster vaccine (CHO cells) LZ901 in subjects aged 40 years and older**

| Generic Name： | Recombinant Zoster Vaccine (CHO cells) |
| --- | --- |
| Clinical Trial Approval Notice： | 2021LP01212、2021LP01213 |
| Clinical Trial Registration Number： | / |
| Registration Category： | Class 1.2 Prophylactic Biological Product |
| Protocol Number： | LZ901-300 |
| Version No.： | V2.1 |
| Version Date： | November 19, 2024 |
|  |  |
| Sponsor: | Beijing Luzhu Biotechnology Co., Ltd.  Luzhu Biopharmaceuticals (Zhuhai) Co., Ltd. |
|  |  |
| Principal Investigator： | Jingxin Li |
|  |  |
| Study Site： | Jiangsu Provincial Center for Disease Control and Prevention (Leading Institution) |
|  | Shandong Provincial Center for Disease Control and Prevention |
|  | Hubei Provincial Center for Disease Control and Prevention |
|  | Shanxi Provincial Center for Disease Control and Prevention |

| Confidentiality Statement  This document contains confidential information and is intended solely for use by investigators, institutional ethics committees, and regulatory authorities. By accepting this document, you agree to maintain the confidentiality of the information and not to disclose any part of it to any other individual or organization without the prior written consent of the sponsor. |
| --- |

Sponsor Approval

| Full Protocol Title: | A multicenter, randomized, blinded clinical, placebo-controlled, phase III clinical trial to evaluate the efficacy and safety of the recombinant zoster vaccine (CHO cells) LZ901 in subjects aged 40 years and older |
| --- | --- |
| Protocol Number： | LZ901-300 |
| Version No.： | V2.1 |
| Version Date： | November 19, 2024 |
| Scope of Revision: | Not Applicable |
| Study Phase: | Phase Ⅲ |
| Sponsor Name and Address | Name: Beijing Luzhu Biotechnology Co., Ltd.  Address: No. 3 Guangtong Street, Tongzhou Industrial Development Zone, Beijing, China  Name: Luzhu Biopharmaceuticals (Zhuhai) Co., Ltd.  Address: Building 8, Zhuhai International Health Port, Jinwan District, Zhuhai, China |
| Sponsor Representative | Name: Xianmin Jiang  Title：Vice President  Telephone：13601052162  E-mail：jiangxm@luzhubiotech.com |
| Sponsor Contact Person: | Name: Xianmin Jiang  Title：Vice President  Telephone：13601052162  E-mail：jiangxm@luzhubiotech.com |
| Sponsor Approval Date: | Name: Xianmin Jiang  Title：Vice President  Signature:  Approval Date: |

Principal Investigator Approval

| Study Title: | A multicenter, randomized, blinded clinical, placebo-controlled, phase III clinical trial to evaluate the efficacy and safety of the recombinant zoster vaccine (CHO cells) LZ901 in subjects aged 40 years and older |
| --- | --- |
| Protocol Number： | LZ901-300 |
| Version No.： | V2.1 |
| Version Date： | 2024年11月19日 |
| **I agree to:**   - Assume responsibility for the proper conduct of this clinical trial in my region and in other designated areas. - Ensure that the trial is conducted in accordance with the protocol and the Clinical Trial Standard Operating Procedures (SOPs). - Ensure that all personnel involved in the trial are adequately informed about the investigational product and about their trial-related duties and obligations as specified in the protocol. - Ensure that no changes to the protocol are made without prior review and written approval from the sponsor and the Institutional Review Board (IRB), unless necessary to eliminate immediate hazards to subjects or to comply with regulatory requirements (e.g., administrative management of the project). - Be fully familiar with the proper use of the vaccine as described in the protocol and fully understand all other information provided by the sponsor, including but not limited to the current Investigator Brochure or an equivalent document. - Be familiar with and comply with the Vaccine Administration Law of the People's Republic of China, the Good Clinical Practice (GCP) Guidelines, the Guidelines for Quality Management of Vaccine Clinical Trials (Interim), and all other applicable regulatory requirements. | |
| Principal Investigator | Nane：Jingxin Li  Institution: Jiangsu Provincial Center for Disease Control and Prevention  Signature:  Date: |

Signature Page for Principal Sub-Investigator

| Study Title: | A multicenter, randomized, blinded clinical, placebo-controlled, phase III clinical trial to evaluate the efficacy and safety of the recombinant zoster vaccine (CHO cells) LZ901 in subjects aged 40 years and older |
| --- | --- |
| Protocol Number： | LZ901-300 |
| Version No.： | V2.1 |
| Version Date： | 2024年11月19日 |
| **I agree to:**   - Assume responsibility for the proper conduct of this clinical trial in my region and in other designated areas. - Ensure that the trial is conducted in accordance with the protocol and the Clinical Trial Standard Operating Procedures (SOPs). - Ensure that all personnel involved in the trial are adequately informed about the investigational product and about their trial-related duties and obligations as specified in the protocol. - Ensure that no changes to the protocol are made without prior review and written approval from the sponsor and the Institutional Review Board (IRB), unless necessary to eliminate immediate hazards to subjects or to comply with regulatory requirements (e.g., administrative management of the project). - Be fully familiar with the proper use of the vaccine as described in the protocol and fully understand all other information provided by the sponsor, including but not limited to the current Investigator Brochure or an equivalent document. - Be familiar with and comply with the Vaccine Administration Law of the People's Republic of China, the Good Clinical Practice (GCP) Guidelines, the Guidelines for Quality Management of Vaccine Clinical Trials (Interim), and all other applicable regulatory requirements. | |
| Principal Sub-Investigator | Nane：  Institution:  Signature:  Date: |

Summary of Changes from Previous Versions

| **Version** | **Date** | **Amendment Summary** | **Reason** |
| --- | --- | --- | --- |
| V1.0 | August 5, 2023 | Initial Version | / |
| V1.1 | September 5, 2023 | 1. Revision of version number and version date; 2. Addition of specific scenarios for protocol deviations and protocol violations; 3. Revision of the storage temperature for biological samples of suspected herpes zoster cases and backup serum samples to –70°C or below; 4. Deletion of the description regarding temperature (axillary) measurement at 7–30 days; 5. Revision of the required serum sample volume for testing to one tube of 0.5 mL; 6. Addition of vital signs grading criteria under severity assessment, clarifying the severity grading of fever; 7. Textual corrections. | Revised based on ethics committee feedback and the feasibility of site operations. |
| V2.0 | September 13, 2023 | Revision of version number and version date;  Revision of the primary and secondary objectives;  Revision of the primary and secondary endpoints. | Change of study objectives and study endpoints. |
| V2.1 | November 19, 2024 | Revision of version number and version date;  Change of sponsor contact person;  Change of principal investigator;  Textual corrections. | Adjustments based on actual circumstances and textual corrections. |

Table of contents

[Sponsor Approval 2](#_Toc22244)

[Principal Investigator Approval 2](#_Toc19062)

[Signature Page for Principal Sub-Investigator 4](#_Toc20991)

[Summary of Changes from Previous Versions 5](#_Toc32721)

[Table of contents 1](#_Toc10118)

[1. Protocol Summary 6](#_Toc4529)

[1.1 Protocol Synopsis 6](#_Toc20642)

[1.2 Study Diagram 17](#_Toc10154)

[1.3 Study Schedule 19](#_Toc8880)

[2. Introduction 21](#_Toc15922)

[2.1 Background 21](#_Toc24350)

[2.2 Benefits and Risks 24](#_Toc5747)

[2.2.1 Benefits 24](#_Toc1241)

[2.2.2 Risks 24](#_Toc5223)

[2.2.3 Summary of benefits and risks 25](#_Toc16765)

[3. Study objectives and endpoints 27](#_Toc16598)

[3.1 Primary Objective and Related Endpoints 27](#_Toc17763)

[3.1.1 Primary objective 27](#_Toc14114)

[3.1.2 Primary Endpoint 27](#_Toc3614)

[3.2 Secondary Objectives and Related Endpoints 27](#_Toc17714)

[3.2.1 Secondary Objectives 27](#_Toc27089)

[3.2.2 Secondary Endpoints 27](#_Toc25745)

[3.3 Exploratory Objectives and Related Endpoints 28](#_Toc10219)

[3.3.1 Exploratory Objectives 28](#_Toc15037)

[3.3.2 Exploratory Endpoints 28](#_Toc17554)

[4. Study Design 29](#_Toc5472)

[4.1 Description of the Study Design 29](#_Toc30846)

[4.1.1 Sample Collection 29](#_Toc11581)

[4.1.2 Vaccination 31](#_Toc6312)

[4.1.3 Follow-up visit 31](#_Toc3489)

[4.1.3.1 Vaccine efficacy observation 31](#_Toc19575)

[4.1.4 Study Duration 32](#_Toc11361)

[4.2 Rationale for the Selection of the Study Design 33](#_Toc5715)

[4.2.1 Rationale for the Selection of the Control Vaccine 33](#_Toc24223)

[4.2.2 LZ901 Preclinical trial data 33](#_Toc18881)

[4.2.2.4 Reproductive toxicity study of LZ901 vaccine 34](#_Toc30966)

[4.2.3 Phase I/II Clinical Trial Data 35](#_Toc9081)

[4.2.3.1 Phase I clinical trial 35](#_Toc7607)

[4.2.3.2 Phase Ⅱ clinical trial 36](#_Toc6935)

[4.3 Access to Study Intervention After Study Completion 36](#_Toc4701)

[4.4 Start and End of the Study 37](#_Toc843)

[5. Study Population 37](#_Toc32106)

[5.1 The selection of the study population 37](#_Toc29894)

[5.2 The selection basis for the study population 37](#_Toc14397)

[5.3 Inclusion criteria 37](#_Toc8486)

[5.4 Exclusion criteria 37](#_Toc31920)

[5.5 Screening Failure 38](#_Toc22196)

[6. Study intervention 39](#_Toc13429)

[6.1 Study intervention procedure 39](#_Toc695)

[6.1.1 Subject recruitment 39](#_Toc8334)

[6.1.2 Informed Consent 39](#_Toc12193)

[6.1.3 Screening 39](#_Toc341)

[6.1.4 Randomization of Subjects 39](#_Toc9571)

[6.1.5 Sample Collection 40](#_Toc27626)

[6.1.6 The first dose of vaccination 40](#_Toc17837)

[6.1.7 The second dose of vaccination 40](#_Toc8205)

[6.1.8 Medical Observation 41](#_Toc19174)

[6.1.9 Efficacy Follow-up 41](#_Toc2463)

[6.1.10 Safety Follow-up 43](#_Toc2074)

[6.1.11 Concomitant Medications 44](#_Toc13157)

[6.2 Basis for Intervention Selection 45](#_Toc31034)

[6.3 Dosage and Administration 46](#_Toc23757)

[6.4 Preparation, Handling, Storage, and Counting 46](#_Toc11860)

[6.4.1 Preparation of Study Intervention 46](#_Toc12975)

[6.4.2 Blinding of Study Interventions 47](#_Toc12730)

[6.4.3 Handling and Storage of Study Interventions 47](#_Toc27506)

[6.4.4 Packaging and Labeling 47](#_Toc18478)

[6.4.5 Inventory of Study Interventions 48](#_Toc18682)

[6.4.6 Backup vaccine 48](#_Toc22335)

[6.5 Subject Assignment, Randomization, and Blinding 48](#_Toc9071)

[6.5.1 Randomization of Subject 48](#_Toc13449)

[6.5.2 Randomization 49](#_Toc23851)

[6.5.3 Blinding and Unblinding 49](#_Toc22692)

[6.6 Study Intervention Compliance 51](#_Toc10893)

[7. Discontinuation of Study Intervention and Subject Withdrawal from the Study 52](#_Toc14980)

[7.1 Discontinuation of Study Intervention 52](#_Toc16764)

[7.1.1 Postponement Criteria for the Second Vaccination 52](#_Toc28718)

[7.1.2 Exclusion Criteria for the Second Dose 52](#_Toc8376)

[7.2 Subject Withdrawal from Study 53](#_Toc748)

[7.2.1 Criteria for Subject Withdrawal from Study 53](#_Toc17347)

[7.2.2 Reasons for Subject Withdrawal 53](#_Toc16914)

[7.3 Discontinuation of Study Vaccine 53](#_Toc24346)

[7.4 Loss to Follow-Up 54](#_Toc28884)

[7.5 Criteria for study suspension 54](#_Toc12062)

[7.6 Criteria for study termination 54](#_Toc20490)

[8. Study Evaluation and Procedures 55](#_Toc30558)

[8.1 Screening Evaluation and Procedures 55](#_Toc19151)

[8.2 Evaluation and Procedures for Vaccine Efficacy 55](#_Toc32035)

[8.2.1 Specimen Collection 55](#_Toc1375)

[8.2.2 Specimen Storage and Transportation 56](#_Toc24431)

[8.2.3 Varicella-zoster virus (VZV)–specific IgG antibody testing 56](#_Toc18341)

[8.2.4 Pathogen Testing 56](#_Toc32710)

[8.2.5 Endpoint Event Determination 56](#_Toc18759)

[8.3 Safety Evaluation and Procedures 57](#_Toc2690)

[8.3.1 Physical Examination 57](#_Toc21322)

[8.3.2 Vital Signs 57](#_Toc25213)

[8.3.3 Safety Assessment 57](#_Toc2930)

[8.4 Adverse events and serious adverse events 57](#_Toc4950)

[8.4.1 Definitions of AE and SAE 57](#_Toc8208)

[8.4.2 Identification and Documentation of AEs and SAEs 57](#_Toc18082)

[8.4.3 Follow-up for AEs and SAEs 58](#_Toc32480)

[8.4.4 SAE Reporting 58](#_Toc22555)

[8.4.5 SAE Regulatory Reporting Requirements 59](#_Toc32536)

[8.4.6 Suspected Unexpected Serious Adverse Reaction (SUSAR) 59](#_Toc30453)

[8.4.7 Adverse Events of Special Interest (AESIs) 60](#_Toc17745)

[8.4.8 Disease-Related Events Not Meeting AE or SAE Criteria 60](#_Toc789)

[8.4.9 Development Safety Update Report (DSUR) 60](#_Toc12081)

[8.5 Pregnancy and Postpartum Information 60](#_Toc6863)

[8.6 Evaluation of Immunogenicity and Immune Persistence 61](#_Toc26514)

[8.6.1 Biological sample collection 61](#_Toc29732)

[8.6.2 Storage and handling of biological samples 61](#_Toc20687)

[8.6.3 Biological sample labeling rules 61](#_Toc25303)

[8.6.4 Biological sample testing 61](#_Toc26386)

[9. Statistical considerations 62](#_Toc21529)

[9.1 Analysis set 62](#_Toc26058)

[9.2 Statistical hypotheses 63](#_Toc5270)

[9.3 Sample size determination 64](#_Toc20998)

[9.4 Analysis methods 64](#_Toc7147)

[9.4.1 General Principles 64](#_Toc12491)

[9.4.2 Vaccine efficacy 64](#_Toc9731)

[9.4.3 Immunogenicity 64](#_Toc4963)

[9.4.4 Safety 65](#_Toc20502)

[9.5 Statistical Analysis Plan 66](#_Toc1978)

[9.5.1 Primary Analysis 66](#_Toc25353)

[9.5.2 Final analysis 66](#_Toc10264)

[9.6 Protocol deviation 66](#_Toc31460)

[10. General Considerations: Regulatory, Ethical, and Trial Oversight 67](#_Toc26566)

[10.1 Regulatory and Ethical Considerations 67](#_Toc12446)

[10.1.1 Investigator Responsibilities 67](#_Toc5521)

[10.1.2 Sponsor Responsibilities 68](#_Toc6722)

[10.2 Ethics Committee 68](#_Toc21249)

[10.2.1 Follow-Up Review 68](#_Toc28667)

[10.2.2 Amendment Review 68](#_Toc12379)

[10.2.3 Annual/Periodic Follow-Up Review 69](#_Toc8837)

[10.2.4 Serious Adverse Event Review 69](#_Toc1688)

[10.2.5 Non-Compliance/Protocol Violation Review 69](#_Toc27994)

[10.2.6 Early Termination Review 69](#_Toc30733)

[10.2.7 Study Completion Review 70](#_Toc29500)

[10.3 Informed Consent Process 70](#_Toc26441)

[10.4 Early Closure of Research Center or Study Termination 70](#_Toc29700)

[11. General Considerations: Risk Management and Quality Assurance 70](#_Toc1571)

[11.1 Data Quality Assurance 70](#_Toc3589)

[11.1.1 Investigator 70](#_Toc17937)

[11.1.2 Sponsor 71](#_Toc20363)

[11.1.3 Clinical Research Associate (CRA) 71](#_Toc31791)

[11.1.4 Protocol Amendments 71](#_Toc16697)

[11.1.5 Biological Sample Management 72](#_Toc24237)

[11.1.6 Vaccine Management 72](#_Toc6216)

[11.1.7 Instrument and Equipment Calibration 73](#_Toc28283)

[11.1.8 Original Data Management 73](#_Toc30728)

[11.1.9 Study Documentation 74](#_Toc14177)

[11.2 Source Data 74](#_Toc9224)

[11.2.1 eCRF Design 74](#_Toc25072)

[11.2.2 eCRF Completion Guidelines 75](#_Toc20684)

[11.2.3 eCRF Annotation 75](#_Toc11762)

[11.2.4 Database Design 75](#_Toc28419)

[11.2.5 Permission Allocation 75](#_Toc24886)

[11.2.6 eCRF Completion 75](#_Toc28055)

[11.2.7 Query Issuance and Resolution 75](#_Toc22004)

[11.2.8 Data Modification and Review 76](#_Toc4366)

[11.2.9 Medical Coding 76](#_Toc27933)

[11.2.10 SAE Consistency Comparison 76](#_Toc13070)

[11.2.11 Data Review Meeting 76](#_Toc3148)

[11.2.12 Database Lock and Unlock 76](#_Toc4881)

[11.2.13 Data Backup and Recovery 76](#_Toc19516)

[11.2.14 Data Storage 77](#_Toc27003)

[11.2.15 Data Confidentiality 77](#_Toc25581)

[12. Appendix: Adverse Events (AEs) and Serious Adverse Events (SAEs) – Definitions, Severity, and Causality 77](#_Toc14522)

[12.1 Further Details and Explanations on the Definition of AE 77](#_Toc32216)

[12.2 Further Details and Explanations on the Definition of SAE 77](#_Toc29725)

[12.3 Severity 77](#_Toc20453)

[12.4 Causality 81](#_Toc4723)

[13. Appendix: Definitions and Supportive Operational Details 83](#_Toc21511)

[13.1 Contraception and Pregnancy Testing 83](#_Toc4803)

[13.1.1 Definitions Related to Fertility 83](#_Toc11933)

[13.1.2 Contraception 83](#_Toc27538)

[13.1.3 Pregnancy Testing 83](#_Toc30996)

[14. Appendix: Glossary of Terms 85](#_Toc24985)

[List of Abbreviations 85](#_Toc6748)

[Glossary of Terms 87](#_Toc26832)

[Relevant Definitions 88](#_Toc25638)

[Determination Process for Valid Endpoint Cases 91](#_Toc2881)

[15. Disclosure and Publication of Data 92](#_Toc8974)

[16. Reference 92](#_Toc285)

1. Protocol Summary
   1. Protocol Synopsis

| **Full Title** | A multicenter, randomized, blinded clinical, placebo-controlled, phase III clinical trial to evaluate the efficacy and safety of the recombinant zoster vaccine (CHO cells) LZ901 in subjects aged 40 years and older |
| --- | --- |
| **Short Title** | Phase III Clinical Trial of the Efficacy of the recombinant zoster vaccine (CHO cells) |
| **Product Characteristics** | The recombinant zoster vaccine (CHO cells) used in this study (Code: LZ901 vaccine) is a varicella-zoster virus glycoprotein E fusion protein (VZV gE-Fc) expressed in CHO cells through genetic engineering technology, developed by Beijing Luzhu Biotechnology Co., Ltd. and Luzhu Biopharmaceutical (Zhuhai) Co., Ltd. The LZ901 cell line carrying the target gene is cultured in a chemically defined medium. The cell culture supernatant is harvested and undergoes multi-step liquid chromatography purification, followed by viral inactivation/removal through low pH treatment and nanofiltration, to obtain a highly purified VZV gE-Fc bulk solution. The bulk is then adsorbed onto an aluminum adjuvant to formulate the vaccine at an appropriate concentration. Each vial contains 0.5 mL. Each single human dose is 0.5 mL, containing 100μg of antigen. |
| **Indication** | For the prevention of herpes zoster (HZ) and its complications caused by infection with varicella-zoster virus (VZV). |
| **Study Population** | Aged 40 years and older |
| **Phase** | Phase Ⅲ |
| **Study Objectives** | |
| **Primary Objective** | To evaluate the vaccine efficacy (VE) of the recombinant zoster vaccine (CHO cells) compared with placebo in preventing herpes zoster (HZ) 30 days after completion of the full vaccination in adults aged ≥40 years. |
| **Secondary Objectives** | 1. To evaluate the vaccine efficacy (VE) of the recombinant zoster vaccine (CHO cells) compared with placebo in preventing laboratory-confirmed herpes zoster (HZ) cases 30 days after the full vaccination in adults aged ≥40 years. 2. To evaluate the safety of the recombinant zoster vaccine (CHO cells). 3. To evaluate the immunogenicity of the recombinant zoster vaccine (CHO cells) in the immunogenicity subset. 4. To evaluate the lot-to-lot consistency of immunogenicity among three batches of the recombinant zoster vaccine (CHO cells) in adults aged ≥40 years (in the immunogenicity subset). |
| **Exploratory Objectives** | 1. To evaluate the effect of the recombinant zoster vaccine (CHO cells) in reducing the severity of post-herpetic neuralgia (PHN) among herpes zoster (HZ) efficacy endpoint cases in adults aged ≥40 years. 2. To evaluate the vaccine efficacy of the recombinant zoster vaccine (CHO cells) compared with placebo in preventing the occurrence of post-herpetic neuralgia (PHN) among herpes zoster (HZ) efficacy endpoint cases in adults aged ≥40 years. 3. To evaluate the persistence of immunogenicity at 12 months, 24 months, and 36 months after the full vaccination with the recombinant zoster vaccine (CHO cells) in adults aged over 40 years (in the immunogenicity subset). |
| **Study Endpoints** | |
| **Primary Endpoint** | Vaccine Efficacy：To calculate the vaccine efficacy by comparing the number of HZ efficacy endpoint cases (including laboratory-confirmed cases and clinically diagnosed cases as determined by the Clinical Endpoint Committee) occurring 30 days after the full vaccination between the recombinant zoster vaccine (CHO cells) group and the placebo group. |
| **Secondary Endpoints** | （1）Vaccine Efficacy Endpoint：  -To calculate the vaccine efficacy by comparing the incidence of laboratory-confirmed herpes zoster (HZ) cases, occurring 30 days after the full vaccination between the recombinant zoster vaccine (CHO cells) group and the placebo group.  （2）Safety Endpoint：   - Incidence of solicited adverse events (AE) within 0-7 days after each dose, including local (injection site) and systemic (non-injection site) reactions; - Incidence of unsolicited AEs within 0-30 days after each dose; - Incidence of AEs within 30 minutes after each dose; - Incidence of adverse events of special interest (AESIs) from the first dose through 30 days after full immunization; - Incidence of serious adverse events (SAEs) from the first dose through 12 months after full immunization.   （3）Immunogenicity Endpoints (Immunogenicity Subset)：   - The seroconversion rates of anti-gE antibodies 30 days after the full vaccination among the three different vaccine batches. - The geometric mean fold increase (GMFI) of anti-gE antibodies from Day 0 (pre-vaccination) to 30 days after the full vaccination among the three different vaccine batches. - The geometric mean concentration (GMC) ratios of anti-gE antibodies 30 days after the full vaccination among the three different vaccine batches. |
| **Exploratory Endpoints** | 1. To evaluate the effect of the recombinant zoster vaccine (CHO cells) in reducing the Zoster Brief Pain Inventory (ZBPI) scores for post-herpetic neuralgia (PHN) among herpes zoster (HZ) efficacy endpoint cases in adults aged ≥40 years. 2. To evaluate the effect of the recombinant zoster vaccine (CHO cells) compared with placebo in reducing the incidence of PHN (ZBPI score ≥0), severe PHN (ZBPI score ≥3), and severe herpes zoster-related acute pain (ZBPI score ≥3) among herpes zoster (HZ) efficacy endpoint cases in adults aged ≥40 years. 3. Immunogenicity persistence (at 12 months, 24 months, and 36 months after the full vaccination):  - Geometric mean concentrations (GMCs) and seroconversion rates of anti-gE antibodies; - Geometric mean fold increases (GMFIs) of anti-gE antibodies compared with pre-vaccination levels. |
| **Study Design** | **Overall design:** multicenter, randomized, double-Blind, placebo-controlled  **Control：**Placebo (Aluminum Hydroxide)  **Immunization Schedule:** Day 0 and Day 30  **Treatment Groups:** Vaccine Group and Placebo Group  **Blinding:** LZ901-300 is a double-blind study (subjects, observers, and final evaluators are blinded).  **Immunogenicity Subset:** The immunogenicity subset is designed to evaluate the lot-to-lot consistency of immunogenicity among three different batches of the study vaccine, as well as to assess the immunogenicity and long-term persistence of immunogenicity (at 12 months, 24 months, and 36 months after the full vaccination). |
| **Study Vaccine** | **Experimental Vaccine:** Vaccine Name: Recombinant zoster vaccine (CHO Cells)  Specification: 100μg/0.5ml/ vial Lot Number: 20230201、20230202、20230203  Manufacturer: Luzhu Biopharmaceuticals (Zhuhai) Co., Ltd. |
| **Placebo：**  Product Name：Recombinant Zoster Vaccine Placebo  Specification: 0.5ml/ vial  Lot Number: 20230204  Manufacturer: Luzhu Biopharmaceuticals (Zhuhai) Co., Ltd. |
| **Sample Size and Randomization** | |
|  | **The LZ901-300 study** includes a vaccine efficacy study and a lot-to-lot consistency study (immunogenicity subset).  Approximately 26,000 subjects aged ≥40 years are planned to be enrolled in the LZ901-300 study (approximately 6,000 subjects aged 40–49 years, 9,000 subjects aged 50–59 years, 9,000 subjects aged 60–69 years, and 2,000 subjects aged ≥70 years). Subjects will be randomized into the vaccine group and placebo group, stratified by study center and age group. Approximately 3,000 subjects will be recruited from a selected study site to form the immunogenicity subset, and randomized in a 1:1:1:3 ratio into three different vaccine batch groups and one placebo batch group.  Subjects in the vaccine group will receive two doses of the recombinant zoster vaccine (CHO cells) developed by Beijing Luzhu Biotechnology Co., Ltd., administered according to the immunization schedule on Day 0 and Day 30. Subjects in the placebo group will receive two doses of the recombinant zoster vaccine placebo on the same immunization schedule (Day 0 and Day 30).  For the lot-to-lot consistency study (immunogenicity subset), approximately 3,000 subjects will be enrolled to assess the consistency of immunogenicity across different vaccine batches and to observe the long-term persistence of immunogenicity.  The planned group allocation for LZ901-300 is as follows:  Number of Subjects Allocated by Age Group   | Age (years) | Experimental vaccine | | Control group | | Total Target Number of Subjects | | --- | --- | --- | --- | --- | --- | | Total | Immunogenicity Subset* | Total | Immunogenicity Subset* | | 40-49 | 3000 | 360 | 3000 | 360 | 6000 | | 50-59 | 4500 | 500 | 4500 | 500 | 9000 | | 60-69 | 4500 | 500 | 4500 | 500 | 9000 | | ≥70 | 1000 | 140 | 1000 | 140 | 2000 |   **The immunogenicity subset accounts for approximately 12% of the total target enrollment.*  Number of Subjects Allocated to Each Batch in the Immunogenicity Subset (Including Immunogenicity and Persistence Assessments)   | Experimental vaccine 20230201 | Experimental vaccine 20230202 | Experimental vaccine 20230203 | Placebo | | --- | --- | --- | --- | | 500 | 500 | 500 | 1500 |   Number of Subjects Allocated by Study Analysis Objective   | Study Analysis Objective | Age (years) | Experimental vaccine | Placebo | | --- | --- | --- | --- | | Vaccine Efficacy and Safety | 40-49 | 3000 | 3000 | | 50-59 | 4500 | 4500 | | 60-69 | 4500 | 4500 | | ≥70 | 1000 | 1000 | | Immunogenicity and Immunogenicity Persistence | 40-49 | 360 | 360 | | 50-59 | 500 | 500 | | 60-69 | 500 | 500 | | ≥70 | 140 | 140 | |
| **Vaccination and Follow-up** | |
| **Vaccination** | Subjects in both the vaccine group and the placebo group will receive two doses of the study vaccine on Day 0 and Day 30. Each subject will undergo a total of 16 visits, including 5 on-site visits and 11 online visits. Subjects in the immunogenicity subset will complete 24 visits, including 8 on-site visits and 16 online visits. For detailed visit schedules and procedures, refer to the Study Visit Schedule. For subjects with suspected herpes zoster (HZ), the visit timing and procedures are described in the Visit Schedule for Suspected HZ Cases. |
| **Follow-up visit** | **Vaccine efficacy observation:** This study is a case-driven trial, collecting all suspected herpes zoster (HZ) cases from the administration of the first dose of the study vaccine until the end of the study. All suspected HZ cases must be submitted to the Clinical Event Committee (CEC) for adjudication. The detailed adjudication procedures are described in the Clinical Event Committee Charter. The CEC is established by the CEC Chair and consists of three dermatology experts in accordance with the Clinical Event Committee Charter.  **Suspected Herpes Zoster Cases:** Suspected HZ cases are defined as newly developed, unilateral clusters of vesicles or papulovesicles distributed along a peripheral nerve, typically accompanied by neuralgia, without other identifiable causes. A suspected HZ case meets at least one of the following diagnostic criteria:   1. Unilateral rash; 2. Vesicles distributed in a dermatomal, clustered pattern along a peripheral nerve; 3. Neuralgia.   **Laboratory-Confirmed Cases:** Cases that meet the definition of suspected HZ, are VZV qPCR positive, and are adjudicated as herpes zoster by the Clinical Event Committee (CEC).  **Clinically Diagnosed Cases:** Cases that meet the definition of suspected HZ but lack sufficient or valid samples for laboratory confirmation, or have negative laboratory results, and are adjudicated as herpes zoster by the CEC.  **Efficacy Endpoint Cases:** Laboratory-confirmed or clinically diagnosed HZ cases, as determined by the CEC, occurring ≥30 days after completion of the full vaccination.  **Adverse Events of Special Interest (AESIs):** Confirmed HZ cases occurring from the administration of the first dose up to 30 days after the full vaccination. |
|  | **Safety observation:** Collect all AEs (adverse events) within 30 days after vaccination (including solicited AEs within 30 minutes, 0-7 days, and all unsolicited AEs within 0-30 days). Follow-up for pregnancy events from the first dose administration to 6 months after the full vaccination, and for all serious adverse events (SAEs) to 12 months after the full vaccination.  Solicited AEs include:   | Injection site (local) AEs | Pain，pruritus，induration，swelling，rash，redness | | --- | --- | | Non-injection site (systemic) AEs | Fatigue, tiredness, fever, headache, insomnia, myalgia, skin and mucosal abnormalities, pain at non-injection sites, diarrhea, constipation, vomiting, nausea, acute allergic reactions, arthritis, arthralgia |   **Unsolicited AEs include:** Any adverse event that is not a solicited AE or any solicited AE occurring outside the solicitation period (e.g., If the solicited AEs mentioned above occur more than 7 days after vaccination, they should be recorded as unsolicited AEs).  **Collection of AESIs (Adverse Events of Special Interest):** Suspected cases of herpes zoster within 30 days following the first dose of vaccination to full immunization. |
| **Immunogenicity and Immunogenicity Persistence Observation:** Blood samples will be collected from subjects in the immunogenicity subgroup of study LZ901-300 at five time points: prior to vaccination, and at 30 days, 12 months, 24 months, and 36 months after the full vaccination schedule. Varicella-zoster virus glycoprotein E (gE)-specific antibodies will be tested to evaluate the immunogenicity and the durability of the immune response induced by the vaccine. |
| **Study Population** | |
| **Inclusion criteria** | 1. Age 40 years or older on the day of enrollment, regardless of gender, and able to provide legal identification. 2. Able to understand the trial procedures, voluntarily agree to participate in the study, and sign the "Informed Consent Form." 3. Female subjects are not pregnant or lactating. Female subjects with childbearing potential should take reliable contraceptive measures, and have no pregnancy and fertility plan within 7 months; 4. Axillary temperature ≤ 37.0°C/99.0℉ on the day of enrollment. 5. Able to attend all scheduled follow-up visits and able to comply with protocol requirements. |
| **Exclusion Criteria** | 1. History of herpes zoster within the past 5 years. 2. Previous vaccination with varicella vaccine or zoster vaccine (including use of registered products or participation in clinical trials for varicella or zoster vaccines). 3. Allergy to any component of the study vaccine: Previous allergy to any recombinant vaccine derived from CHO cells (such as recombinant hepatitis B vaccine [CHO cells]), polysorbates, or a history of severe allergic reactions* to any vaccination. *Severe allergic reactions: Anaphylactic shock, allergic laryngeal edema, allergic purpura, thrombocytopenic purpura, localized allergic necrotic reaction (Arthus reaction), severe urticaria, etc. 4. Diagnosis of immune deficiency diseases (such as congenital or acquired immunodeficiency, HIV infection, etc.), or receiving immunosuppressive/cytotoxic treatment (e.g., chemotherapy, organ transplantation, or planned treatment during the clinical trial within 6 months before vaccination). 5. Subjects who received immunosuppressive therapy within 3 months before vaccination, or planning to receive such treatment within 1 month after full immunization (e.g., long-term use of systemic glucocorticoids for ≥ 14 days, dose ≥ 2 mg/kg/day or ≥ 20 mg/day prednisone or equivalence); 6. Receiving an inactivated vaccine, recombinant vaccine, or mRNA vaccine within 14 days or any live vaccine within 28 days prior to vaccination; 7. Subjects with acute illness or in the acute phase of a chronic disease within 3 days prior to vaccination. 8. Asplenia or splenectomy. 9. Subjects who receive blood products or immunoglobulin therapy within 3 months before vaccination, or planning to use such products within 2 months after vaccination. 10. Participating in other clinical studies of investigational or un-registered products (drugs, vaccines or devices, etc.), or planning to participate in other clinical studies before the end of this clinical study. 11. Any significant underlying medical condition (e.g., life-threatening diseases that may limit survival to less than 4 years) or other conditions that the investigator believes may interfere with the completion of the study. |
| **Postponement Criteria for the Second Vaccination** | The study intervention (second dose of vaccine) should be suspended (or delayed) until the situation resolves in the following cases:   1. Axillary temperature > 37.0°C/99.0℉ ; 2. Acute illness within 3 days prior to vaccination (e.g., acute upper respiratory infection with symptoms such as fever, cough, sore throat, difficulty breathing) or during an acute stage of a chronic disease, or use of antipyretics, analgesics, or antihistamines; 3. Insufficient interval between vaccinations (receiving an inactivated vaccine, recombinant vaccine, or mRNA vaccine within 14 days prior to vaccination, or any live attenuated vaccine within 28 days prior to vaccination); 4. Any Grade 3 or higher adverse event on the day of vaccination; 5. For suspected herpes zoster (HZ) cases, vaccination is permitted outside the designated window period after HZ has been ruled out and the subject's symptoms are no longer in the acute phase. 6. Other circumstances where the investigator considers vaccination should be delayed. |
| **Exclusion Criteria for the Second Dose** | The investigator will terminate the administration of the second dose of the study vaccine if any of the following occur:   1. Any serious adverse event (SAE) related to the vaccination; 2. Severe allergic reaction following vaccination; 3. Suspected varicella-zoster virus (VZV) infection after the first dose of immunization; 4. Discovery of any new condition that meets the "exclusion criteria for the first dose"; 5. Any other reason, as determined by the investigator, that requires discontinuation of the study vaccine administration. |
| **Criteria for Subject Withdrawal from Study** | A subject will be withdrawn from the study if any of the following conditions occur:   1. Development of intolerable severe adverse events or any condition that makes the subject unsuitable to continue participation in the study. 2. Occurrence of a severe allergic reaction related to the experimental vaccine, and the investigator assesses that the subject is no longer suitable to continue in the study. 3. The subject voluntarily withdraws from the study. 4. Poor compliance, failure to adhere to the study protocol, or loss to follow-up. 5. If an enrolled subject develops a condition during the study that makes continued participation unsuitable, and the investigator assesses that the risks of participation outweigh the potential benefits, the investigator may decide to withdraw the subject from the study. |
| **Criteria for suspension and termination of the study** | |
| **Criteria for study suspension** | 1. New data regarding the study vaccine obtained from this study or any other study, or management reasons suggesting that the risks outweigh the benefits, prompting the sponsor, investigator, and/or ethics committee to recommend a suspension; 2. The occurrence of a serious adverse event that is potentially life-threatening or leads to the subject death, which may be related to the vaccination; 3. If ≥ 15% of subjects experience Grade 3 or higher adverse events during the study, these events do not resolve to below Grade 3 within 48 hours.   If the study is suspended, the ethics committee (IRB) and provincial or national drug regulatory authorities or relevant departments must be notified. An expert meeting will be conducted to assess safety, and a blinded analysis may be conducted if necessary to determine whether the study should continue. The study may resume once safety, protocol compliance, and data quality issues are resolved and the requirements of the sponsor, ethics committee, and/or national regulatory authorities are met. |
| **Criteria for study termination** | 1. Reaching the study endpoints; 2. Any subject experiencing a life-threatening or fatal serious adverse event related to the study vaccine during the study; 3. The incidence of ≥ Grade 3 adverse reactions related to the study vaccine was ≥15% during the post-vaccination follow-up period.   If the study is terminated early, the sponsor will immediately notify the investigator, clinical trial institution, ethics committee, and regulatory authorities of the reason for termination in accordance with the relevant regulatory requirements. The investigator should report to the clinical trial institution and IRB, providing a detailed written explanation.  Regardless of the reason for suspension or termination, the investigator must immediately inform the subjects and ensure appropriate follow-up is conducted. |
| **Statistical Analysis Plan** | This clinical trial will be conducted with two stages of statistical analysis：  **Primary Analysis** In subjects included in the Efficacy Per-Protocol Set — excluding (1) subjects from the Total Vaccinated Cohort who did not receive the second dose or developed HZ within 30 days after the second dose; and (2) subjects with protocol deviations that significantly impact the efficacy evaluation (data prior to the deviation may still be included in the analysis) — once at least 103 valid endpoint cases have been accumulated, along with safety data covering at least 6 months after full immunization and immunogenicity results from the immunogenicity subset (measured before the first dose and 30 days after full immunization), and after the completion of data entry, cleaning, and database lock for this portion, statistical analyses of efficacy, safety, and immunogenicity will be conducted.The resulting data will be submitted to the NMPA for regulatory review.  **Final Analysis** After all subjects have completed safety follow-up for 12 months post full immunization, the immunogenicity subset has completed 36 months of follow-up, and data collection for suspected HZ cases, safety outcomes, as well as immunogenicity results at 12, 24, and 36 months post full immunization have been obtained, and after the completion of data entry, cleaning, and database lock for this portion, statistical analyses of HZ protective efficacy, safety, and immunogenicity will be conducted. A final clinical study report will be prepared based on these analyses and submitted to the NMPA as a supplemental report for the Phase III clinical trial. |
| **Study Duration** | This is an event-driven study, and the overall study duration depends on the accumulation of valid herpes zoster (HZ) endpoint cases. The observation period may be shortened or extended based on the actual collection of endpoint cases. Each subject participation duration is from the first visit to the last visit, with an estimated participation time of approximately 13 months per subject.  For subjects in the immunogenicity subset, each subject is expected to participate in the study for approximately 37 months. |
| **Visit Duration** | Based on the efficacy results, the immunogenicity follow-up period for subjects in the immunogenicity subset may be extended. If the follow-up period is extended, re-consent from the subjects will be required. |

- 1. Study Diagram

| Visit 1 （D0） | Screening、Vaccination、Safety Follow-up |
| --- | --- |
| - Obtain informed consent - Collect demographic information - Screen subjects based on inclusion and exclusion criteria - Collect pre-dose blood sample before the first vaccination (for immunogenicity subset) - Administer the first dose of vaccine (study vaccine/placebo) - Distribute the Diary Card | |

| Visit 2 （D7） | Safety Observation |
| --- | --- |
| - Collect the Diary Card and review safety information and concomitant medications recorded from Day 0 to Day 7 after the first dose - Distribute the Contact Card | |

| Visit 3（D30） | Screening、Vaccination、Safety Follow-up |
| --- | --- |
| - Screen subjects based on the exclusion criteria for the second dose - Collect the Contact Card and review safety information and concomitant medications recorded from Day 7 to Day 30 after the first dose - Administer the second dose of vaccine (study vaccine/placebo) - Distribute the Diary Card | |

| Visit 4（D37） | Safety Observation |
| --- | --- |
| - Collect the Diary Card and review safety information and concomitant medications recorded from Day 0 to Day 7 after the second dose - Distribute the Contact Card | |

| Visit 5 (30 Days After Full Immunization) | Safety Observation and Blood Sampling |
| --- | --- |
| - Collect the Contact Card and review safety information and concomitant medications recorded from Day 7 to Day 30 after the second dose - Collect blood samples (for the immunogenicity subset) - Distribute the Reminder Card | |

| Visit 6 （6 Months After Full Immunization） | Safety Observation |
| --- | --- |
| - Follow up on all serious adverse events (SAEs) and pregnancy events - Monitor the occurrence of suspected herpes zoster (HZ) cases | |

| Visit 7 （12 Months After Full Immunization） | Safety Observation and immunogenicity |
| --- | --- |
| - Follow up on all serious adverse events (SAEs) - Monitor the occurrence of suspected herpes zoster (HZ) cases - Collect blood samples at 12 months after full immunization (for the immunogenicity subset) | |

| Visit 8 （24 Months After Full Immunization） | Safety Observation and immunogenicity |
| --- | --- |
| - Collect blood samples at 24 months after full immunization (for the immunogenicity subset) - Monitor the occurrence of suspected herpes zoster (HZ) cases | |

| Visit 9 （36 Months After Full Immunization） | Safety Observation and immunogenicity |
| --- | --- |
| - Collect blood samples at 36 months after full immunization (for the immunogenicity subset) - Monitor the occurrence of suspected herpes zoster (HZ) cases | |

- 1. Study Schedule

| **Visit (Time)** | **V1** | **V2** | **V3** | **V4** | **V5** | **V6*** | **V7*** | **V8**** | **V9**** |
| --- | --- | --- | --- | --- | --- | --- | --- | --- | --- |
| **D0** | **D7** | **D30** | **D37** | **30 Days after Full Immunization** | **6 Months after Full Immunization** | **12 Months after Full Immunization** | **24 Months after Full Immunization** | **36 Months after Full Immunization** |
| **Time window (day)** | **/** | **+3** | **-2/+7** | **+3** | **-2/+15** | **-7/+15** | **±30** | **±30** | **±30** |
| Signed informed consent | ■ |  |  |  |  |  |  |  |  |
| Demographic and other basic data | ■ |  |  |  |  |  |  |  |  |
| Medical history | ■ |  |  |  |  |  |  |  |  |
| Physical examination1 | ■ |  | ■ |  |  |  |  |  |  |
| Inclusion criteria  /Exclusion criteria | ■ |  | ■ |  |  |  |  |  |  |
| Pregnancy test2 | ■ |  | ■ |  |  |  |  |  |  |
| Axillary temperature | ■ |  | ■ |  |  |  |  |  |  |
| Randomization | ■ |  |  |  |  |  |  |  |  |
| Blood Collection3 | ▲ |  |  |  | ▲ |  | ▲ | ▲ | ▲ |
| Vaccination | ■ |  | ■ |  |  |  |  |  |  |
| 30 minutes observation | ■ |  | ■ |  |  |  |  |  |  |
| Dispense and train Diary Card | ■ |  | ■ |  |  |  |  |  |  |
| Review and collect Diary Card |  | ■ |  | ■ |  |  |  |  |  |
| Dispense Contact Card |  | ■ |  | ■ |  |  |  |  |  |
| Review and collect Contact Card |  |  | ■ |  | ■ |  |  |  |  |
| Distribute the Reminder Card |  |  |  |  | ■ |  |  |  |  |
| Collection of Concomitant Medication | ■ | ■ | ■ | ■ | ■ |  |  |  |  |
| Collection of Pregnancy Events | ■ | ■ | ■ | ■ | ■ | ■ |  |  |  |
| Serious Adverse Events | ■ | ■ | ■ | ■ | ■ | ■ | ■ |  |  |
| Collect suspected herpes zoster (HZ) cases3 | ■ | ■ | ■ | ■ | ■ | ■ | ■ | ▲ | ▲ |

Note: ■: All subjects; ▲: Subjects in the immunogenicity subset.

1. Physical examination includes height, weight, skin examination, blood pressure, etc. Height and weight measurements may be omitted prior to the second dose.
2. A urine pregnancy test must be performed for women of childbearing potential before each vaccination; a negative result is required to continue participation in the study.
3. Subjects in the immunogenicity subset are required to undergo blood sampling before immunization, and at 1 month, 12 months, 24 months, and 36 months after full immunization.
4. Sample collection and visit time for suspected herpes zoster (HZ) cases are detailed in the Suspected HZ Case Visit Schedule.

* Each subject will have one in-person or online visit per month from V5 to V7.
** Each subject will have one in-person or online visit every three months from V7 to V9.
Each subject will complete a total of 16 visits, including 5 on-site visits and 11 online visits; subjects in the immunogenicity subset will complete a total of 24 visits, including 8 on-site visits and 16 online visits. Subjects will receive 2 doses of the vaccine. The study participation duration is approximately 13 months for general subjects and approximately 37 months for subjects in the immunogenicity subset. This is an event-driven study. The overall study duration depends on the accumulation of valid endpoint cases, and the observation period may be shortened or extended based on the actual case collection progress.

1. Introduction

The recombinant zoster vaccine (CHO cells) developed by the sponsor (hereinafter referred to as the "study vaccine") is intended for the prevention of herpes zoster and its complications caused by the varicella-zoster virus (VZV). Following the review by the National Medical Products Administration (NMPA), the study vaccine was approved for clinical trials and received the Drug Clinical Trial Approval Notice on August 3, 2021, with approval number: 2021LP01212、2021LP01213.

The sponsor has commissioned the Jiangsu Provincial Center for Disease Control and Prevention (CDC) as the lead research institution, with the Shandong Provincial CDC, Hubei Provincial CDC, and Shanxi Provincial CDC serving as collaborative research institutions, to conduct a Phase III clinical trial. The objective is to evaluate the protective efficacy, safety, and immunogenicity of the recombinant zoster vaccine (CHO cells) in individuals aged 40 years and older.

This clinical trial protocol has been developed in accordance with the requirements of the Pharmaceutical Administration Law of the People's Republic of China, the Vaccine Administration Law of the People's Republic of China, the Administrative Measures for Drug Registration, the Good Clinical Practice (GCP) guidelines, the Technical Guidelines for Vaccine Clinical Trials, and the Guidelines for Quality Management of Vaccine Clinical Trials (Interim).

- 1. Background

Varicella-zoster virus (VZV) causes two clinically distinct diseases. Primary infection with VZV results in varicella, which is characterized by generalized conditions and widely scattered rashes and small blisters. In general, it occurs in infants or primary school-age children. After initial varicella infection in infant and young child recovers, the virus establishes latency in the spinal ganglia and other parts of the body. When latent VZV is reactivated, herpes zoster (HZ) occurs, usually manifested as local rash or blisters, accompanied by severe pain.

Typical HZ presents with rash and blisters, usually lasting for 2 to 4 weeks. It is often accompanied by intense pain being described as burning, stabbing pain. In some patients, even gentle touching may cause severe pain in the affected area, which is often referred to as allodynia. The HZ-related pain may be severe, with or without itching, and sometimes is too severe to tolerate.

The most common complication of HZ is post-herpetic neuralgia (PHN). PHN is the pain that persists after the rash/blister resolves. Affected patients often report persistent burning, throbbing, intermittent intense or shock-like pain, or indescribable allodynia. Age is the main risk factor for PHN. PHN may last for several months, and approximately 70% to 80% will resolve within 1 year, despite some may torture patients for many years [Dworkin, 2007]. Other risk factors may include severe HZ rash, which may be a precursor of PHN.

Other complications of HZ include disorders of the eyes, nerves, skin, and viscera, which can lead to severe disabilities. The most common ocular complications of HZ are keratitis and uveitis. Other ophthalmologic complications include ptosis, scleritis, retinitis, secondary glaucoma, and cataracts. Neurological complications of HZ include myelitis, motor neuropathy, brain, and spinal cord ischemic infarction, aneurysms, subarachnoid hemorrhage, and intracerebral hemorrhage [Gilden, 2009; Schmader, 2008].

The seroprevalence of VZV-IgG exceeds 90% in most adult populations, therefore, substantial individuals are at risk of developing HZ. Age is considered as the most common risk factor for shingles, and the incidence is relatively stable until the age of 40 years, with 2-3 in 1000 per year, and then gradually increases with age, with 5 in 1000 per year at the age of 50-59, and 10 in 1000 per year at ≥ 60 years [CDC, 2008; Oxman, 2005]. Although most data on the incidence of shingles comes from the United States (the Americas) and Europe, the available data indicate that the incidence of shingles is similar in other parts of the world (including Japan, South Korea, Australia and Latin America).

About more than half of HZ cases occur in adults over 60, and >85 elders have a 50% chance of having shingles in their lives [Oxman, 2005]. Older patients also have the highest risk of developing PHN, with those aged 70 years and older representing 18-50% of PHN [Oxman, 2005; Scott, 2006]. Patients with impaired cell-mediated immunity (CMI) due to disease, medication, medical intervention, or advanced age are at increased risk for HZ [Cohen, 2007].

Individuals who have received the attenuated VZV strain (OKA strain) vaccine or who have acquired protective immunity after natural VZV infection. VZV-specific antibodies (Abs) help control viral spread in immunocompromised individuals, potentially contributing to limiting the severity of herpes zoster (HZ). Additionally, in the efficacy study of Zostavax™, a correlation was observed between the concentration of anti-VZV antibodies generated after vaccination and protection against HZ [Levin, 2008]. The Oka strain live attenuated vaccine was approved by the U.S. FDA in 1995, followed by approval from regulatory bodies such as the National Medical Products Administration of China and the European Union for pediatric vaccination to prevent wild-type varicella infection in children. The high-dose OKA strain live attenuated vaccine, Zostavax™ (19,400 PFU/dose), was first approved by the U.S. FDA in 2006 for the prevention of herpes zoster in individuals aged 60 and above. In 2011, the indication was expanded to include those aged 50 and above. A single dose (0.65 mL, 19,400 PFU/dose) is administered subcutaneously in the deltoid region of the upper arm. Occasional adverse reactions, such as headache and local injection site reactions, may occur. Large-scale, multicenter clinical trials have verified that vaccination reduced the incidence of herpes zoster by 69.8% in immunocompetent individuals aged 50–59. This product was discontinued in the U.S. market in November 2020.

ShingrixTM is a recombinant subunit zoster vaccine developed by GlaxoSmithKline Biologicals (GSK Biologicals), which consists of VZV glycoprotein E (gE) and a special adjuvant. VZV gE was selected as the subunit vaccine antigen because gE is the target of the host immune response [Cohen, 2007]. gE plays an important role in viral infection and is the antigen to induce neutralizing antibodies against VZV. The vaccine does not contain live virus and has been shown to be safe in all populations, including immunocompromised population. The adjuvant system AS01B, used in combination with the VZV gE antigen (molecular weight approximately 70 KDa), was developed by GSK Biologicals. It is an oily adjuvant composed of the immunostimulant MPL (3-O-deacyl-4'-monophosphoryl lipid A), QS21, liposomes, etc. MPL is chemically detoxified LPA derived from Gram-negative bacteria Salmonella Minnesota. QS-21 is a saponin molecule (triterpene glycoside) extracted and purified from the bark of Quillaja saponaria Molina. It also contains phosphatidylcholine and cholesterol. Vaccines with this oil-based adjuvant can produce high-titer specific antibodies after vaccination, but the incidence of local side effects is much higher than other vaccines, and local pain may last for 2 to3 weeks.

ShingrixTM in immunocompetent adults≥ 50 years reduced the incidence of herpes zoster and PHN by 97.2% and 91.2%, respectively, and by 89.8% and 88.8% in elders≥ 70 years, which showed better efficacy than live attenuated vaccine ZostavaxTM. However, the ultra-high incidence of side effects limits its promising application. In August 2020, this vaccine was officially launched in mainland China for the prevention of herpes zoster in individuals aged 50 and older. The vaccine is administered in a 50µg dose via intramuscular injection into the deltoid muscle, with two doses given at an interval of two months.

Currently, there are two types of zoster vaccines available on the market in China. One is the imported Shingrix™, and the other is the domestically produced live attenuated varicella-zoster virus vaccine, Ganwei®, developed by Changchun BCHT Biotechnology Co., Ltd., which was approved for sale on January 31, 2023. Ganwei® is approved for adults aged 40 and older and requires only a single dose. Given the increasing incidence of herpes zoster among younger individuals, the rising morbidity rate, the large potential patient population in China, and the limited availability of zoster vaccines, the launch and application of zoster vaccines have become even more urgent.

The recombinant zoster vaccine (code: LZ901 vaccine) used in this clinical study is developed by Beijing Luzhu Biotechnology Co., Ltd. The active ingredient is varicella-zoster virus glycoprotein E Fc fusion protein expressed in CHO cells by gene recombination technology. The cloning and screening process of the LZ901 cell line has been carried out in chemically defined media without serum or other animal-derived components, any source of contamination with adventitious agents. The cryopreservation media used in the establishment of cell banks at all levels does not contain any blood or animal-derived proteins or protein hydrolysates. The culture medium and feed liquid used in the cell culture process are chemically defined. After the purification process of affinity chromatography, formaldehyde inactivation, anion exchange, molecular sieve chromatography, and others, the purified product is added with vaccine-specific stabilizer free of protein and proteolytic solution. After filtration through 0.2-micron sterilizing filter membrane, the resulting LZ901 bulk is appropriately diluted and adsorbed to aluminum hydroxide adjuvant to formulate a recombinant zoster vaccine. Each vial contains 0.5 ml, with a single human dose of 0.5 ml, containing 100 μg of LZ901 protein. The residual DNA content in each dose of the vaccine is less than 1 pg (the Pharmacopoeia of China specifies a maximum of 100 pg), ensuring the safety of the vaccine to the greatest extent possible. This vaccine is primarily used for the prevention of herpes zoster and its complications caused by the varicella-zoster virus.

The LZ901 vaccine is a tetramer of varicella-zoster virus glycoprotein E (gE) and Fc fusion protein with a molecular weight of approximately 400 KDa. It is rich in O-glycosylation and N-glycosylation, with glycosylation types covering those have been detected in VZV infection in humans. The LZ901 molecule contains a structure that actively presents VZV gE to Fcγ receptors (FcγR) on the surfaces of dendritic cells and monocytes. This receptor-mediated endocytosis efficiently initiates an immune response against VZV gE, generating high-titer antibodies and a robust cellular immune response.

The results of Phase I and Phase II clinical trials (see data in section 4.2.3) show that the recombinant zoster vaccine is safe and well-tolerated in healthy individuals aged 50-70 years when administered with a 0 and 30-day immunization schedule via intramuscular injection into the deltoid muscle. Adverse reactions are limited to common vaccine-related side effects, with a lower incidence than the positive control vaccine (Shingrix™). After full immunization, both anti-gE antibodies and anti-VZV antibodies were found to be at high levels, with a 100% seroconversion rate. Immunogenicity results were significantly superior to those of the placebo group, with the high-dose group showing more pronounced effects. In conclusion, the recombinant zoster vaccine is safe, well-tolerated, and immunogenic.The Phase III study immunization schedule consists of two doses of the recombinant zoster vaccine at 100 μg/0.5 mL per dose, administered on a 0 and 30 day schedule.

- 1. Benefits and Risks
     1. Benefits

Subjects who receive the study vaccine may acquire immunity against herpes zoster. All subjects participating in the study will be under surveillance for relevant dermatological conditions. Subjects who develop an endpoint disease will receive appropriate medical guidance, free treatment, and compensation.

Vaccination against herpes zoster is the most effective method of prevention, and currently, only two zoster vaccines are available on the market in China. The development and launch of our recombinant zoster vaccine holds significant social value and benefit for China large potential patient population. It will greatly alleviate the pressure caused by the severe shortage of zoster vaccines in the country, addressing the demand for zoster vaccines in China and contributing to the improvement of public health.

- - 1. Risks

LZ901 Phase I clinical trial (40 subjects with study vaccine) risk summary: After receiving the experimental vaccine (both high and low doses), the occurrence of local and systemic adverse events was as follows: pain (13 cases), fatigue (4 cases), headache (4 cases), abdominal pain (2 cases), swelling (2 cases), pruritus (2 cases at the injection site), erythema (1 case), chills (1 case), myalgia (1 case), pharyngeal discomfort (1 case), maculopapular rash (1 case), pruritus (1 case at another site), and pruritic rash (1 case). These were mostly grade 1 adverse events (AEs), which resolved on their own without the need for treatment, and no grade 3 or higher AEs were observed.

Phase II clinical trial (300 subjects with study vaccine) risk summary: After receiving the experimental vaccine (both high and low doses), the occurrence of local and systemic adverse events was as follows: pain (41 cases), induration (5 cases), swelling (3 cases), erythema (9 cases), pruritus (12 cases), fatigue (18 cases), and headache (6 cases). In the high-dose group (100 μg/dose), the most common adverse event was pain at the injection site (17.45%). The severity of adverse events was as follows: grade 1 (26.85%), grade 2 (6.04%), and grade 3 (2.01%). These adverse events did not require treatment and resolved on their own. Overall, the safety of the vaccine was favorable.

Known Risks: Based on the results of Phase I and Phase II clinical trial and previous vaccine experience, intramuscular injection is an invasive procedure. Subjects may experience local adverse reactions at the injection site, such as pain, swelling, induration, erythema, and pruritus, as well as systemic reactions like fatigue, headache, fever, gastrointestinal discomfort (nausea, vomiting, diarrhea, abdominal pain), and, in rare cases, allergic reactions. Most of these adverse events are mild, do not require treatment, and resolve on their own.

Potential Risks: The LZ901 vaccine is a recombinant protein expressed in CHO cells, which may contain trace amounts of residual CHO cell proteins. This could potentially cause allergic reactions in a small number of individuals who have previously received the CHO cell-derived hepatitis B vaccine. The vaccine contains excipients such as polysorbate and aluminum hydroxide adjuvant, which may cause mild irritation to the muscles at the injection site, leading to slight pain. A few individuals may not achieve adequate immune protection and could still be at risk of contracting herpes zoster.

- - 1. Summary of benefits and risks

This product is the first recombinant zoster vaccine in China to enter Phase III clinical trial, and the results of this study may support the vaccine approval for market release to meet the demand for zoster vaccines.

Approximately 50% or more of the subjects may acquire immunity against the targeted disease through vaccination, thereby preventing the occurrence of herpes zoster. All subjects will receive treatment and compensation in the event of herpes zoster onset. Throughout the study, all subjects will be closely monitored by investigators. If any adverse event occurs that is intolerable to the subject, the investigator will promptly discontinue further vaccination or terminate the subject’s participation in the study, and will provide necessary medical treatment until the event is resolved. The sponsor will fully support the management and treatment process.

The sponsor will closely monitor the risks of the study, maintain ongoing discussions with investigators about any adverse events occurring during the study, and promptly inform both investigators and subjects about the latest information regarding the experimental vaccine or similar vaccines. If any risks that may harm the subjects interests are identified, the study will be immediately suspended or terminated, and the relevant regulatory authorities will be notified.

1. Study objectives and endpoints
   1. Primary Objective and Related Endpoints
      1. Primary objective

To evaluate the vaccine efficacy (VE) of the recombinant zoster vaccine (CHO cells) compared with placebo in preventing herpes zoster (HZ) 30 days after completion of the full vaccination in adults aged ≥40 years.

- - 1. Primary Endpoint

Vaccine Efficacy：To calculate the vaccine efficacy by comparing the number of HZ efficacy endpoint cases (including laboratory-confirmed cases and clinically diagnosed cases as determined by the Clinical Endpoint Committee) occurring 30 days after the full vaccination between the recombinant zoster vaccine (CHO cells) group and the placebo group.

*Vaccine Efficacy (VE) = (Rp – Rv) / Rp × 100%*

*Rp = Incidence rate (per person-year) in the placebo group*

*Rv = Incidence rate (per person-year) in the vaccine group*

- 1. Secondary Objectives and Related Endpoints
     1. Secondary Objectives

1. To evaluate the vaccine efficacy (VE) of the recombinant zoster vaccine (CHO cells) compared with placebo in preventing laboratory-confirmed herpes zoster (HZ) cases 30 days after the full vaccination in adults aged ≥40 years.
2. To evaluate the safety of the recombinant zoster vaccine (CHO cells).
3. To evaluate the immunogenicity of the recombinant zoster vaccine (CHO cells) in the immunogenicity subset.
4. To evaluate the lot-to-lot consistency of immunogenicity among three batches of the recombinant zoster vaccine (CHO cells) in adults aged ≥40 years (in the immunogenicity subset).
   - 1. Secondary Endpoints
        1. Vaccine Efficacy Endpoint
5. To calculate the vaccine efficacy by comparing the incidence of laboratory-confirmed herpes zoster (HZ) cases, based on cases occurring 30 days after the full vaccination.
   - - 1. Safety Endpoint

- Incidence of solicited adverse events (AE) within 0-7 days after each dose, including local (injection site) and systemic (non-injection site) reactions;
- Incidence of unsolicited AEs within 0-30 days after each dose;
- Incidence of AEs within 30 minutes after each dose;
- Incidence of adverse events of special interest (AESIs) from the first dose through 30 days after full immunization;
- Incidence of serious adverse events (SAEs) from the first dose through 12 months after full immunization.
  - - 1. Immunogenicity Endpoints (Immunogenicity Subset)

1. The seroconversion rates of anti-gE antibodies 30 days after the full vaccination among the three different vaccine batches.
2. The geometric mean fold increase (GMFI) of anti-gE antibodies from Day 0 (pre-vaccination) to 30 days after the full vaccination among the three different vaccine batches.
3. The geometric mean concentration (GMC) ratios of anti-gE antibodies 30 days after the full vaccination among the three different vaccine batches.
   1. Exploratory Objectives and Related Endpoints
      1. Exploratory Objectives
4. To evaluate the effect of the recombinant zoster vaccine (CHO cells) in reducing the severity of post-herpetic neuralgia (PHN) among herpes zoster (HZ) efficacy endpoint cases in adults aged ≥40 years.
5. To evaluate the vaccine efficacy of the recombinant zoster vaccine (CHO cells) compared with placebo in preventing the occurrence of post-herpetic neuralgia (PHN) among herpes zoster (HZ) efficacy endpoint cases in adults aged ≥40 years.
6. To evaluate the persistence of immunogenicity at 12 months, 24 months, and 36 months after the full vaccination with the recombinant zoster vaccine (CHO cells) in adults aged over 40 years (in the immunogenicity subset).
   - 1. Exploratory Endpoints
7. To evaluate the effect of the recombinant zoster vaccine (CHO cells) in reducing the Zoster Brief Pain Inventory (ZBPI) scores for post-herpetic neuralgia (PHN) among herpes zoster (HZ) efficacy endpoint cases in adults aged ≥40 years.
8. To evaluate the effect of the recombinant zoster vaccine (CHO cells) compared with placebo in reducing the incidence of PHN (ZBPI score ≥0), severe PHN (ZBPI score ≥3), and severe herpes zoster-related acute pain (ZBPI score ≥3) among herpes zoster (HZ) efficacy endpoint cases in adults aged ≥40 years.
9. Immunogenicity persistence (at 12 months, 24 months, and 36 months after the full vaccination):

- Geometric mean concentrations (GMCs) and seroconversion rates of anti-gE antibodies;
- Geometric mean fold increases (GMFIs) of anti-gE antibodies compared with pre-vaccination levels.

1. Study Design
   1. Description of the Study Design

This study adopts a multicenter, randomized, double-blind, placebo-controlled design. The Phase III trial is planned to be conducted across multiple provinces within the country. The number of vaccine doses will be allocated to each study site based on the size of the randomized group. If subject enrollment in any province (for a specific age group or the overall population) falls behind, the enrollment targets for each province may be reallocated to allow other provinces to enroll more participants. This is to ensure that the total number of subjects specified in the protocol is fully and timely achieved.

The LZ901 study includes a vaccine efficacy study and a lot-to-lot consistency study (immunogenicity subset).

LZ901-300 plans to enroll approximately 26,000 subjects aged ≥40 years, with around 6,000 aged 40–49, 9,000 aged 50–59, 9,000 aged 60–69, and 2,000 aged ≥70. Subjects will be stratified by study center and age group, and randomized in a 1:1 ratio into either the vaccine group or the placebo group. Approximately 3,000 of these subjects will be selected for inclusion in the immunogenicity subgroup. These participants will be randomly assigned in a 1:1:1:3 ratio to receive one of three vaccine lots or one placebo lot.

Subjects will receive two doses of the recombinant zoster vaccine (CHO cells), developed by Beijing Luzhu Biotechnology Co., Ltd. and Luzhu Biopharmaceuticals (Zhuhai) Co., Ltd., or placebo, administered on a 0 and 30 day schedule.

For the lot-to-lot consistency study (immunogenicity subgroup), approximately 3,000 subjects will be enrolled to assess lot consistency and undergo immunogenicity persistence follow-up.

The number of subjects in each group of the LZ901-300 study is shown in the table below:

| Age (years) | Experimental vaccine | | Placebo | | Total Target Number of Subjects |
| --- | --- | --- | --- | --- | --- |
| Total | Immunogenicity Subset* | Total | Immunogenicity Subset* |
| 40-49 | 3000 | 360 | 3000 | 360 | 6000 |
| 50-59 | 4500 | 500 | 4500 | 500 | 9000 |
| 60-69 | 4500 | 500 | 4500 | 500 | 9000 |
| ≥70 | 1000 | 140 | 1000 | 140 | 2000 |

**The immunogenicity subset accounts for approximately 12% of the total target enrollment.*

- - 1. Sample Collection
       1. Blood Sample Collection

**Immunogenicity Subgroup Subjects (A total of approximately 3,000 subjects, accounting for about 12% of all subjects in the LZ901-300 study):** Each subject in the immunogenicity subgroup will have blood samples collected at five time points: prior to vaccination, 30 days after completion of the full immunization schedule, and at 12, 24, and 36 months after full immunization. The purpose of these collections is to evaluate the immunogenicity and long-term persistence of immune response induced by the vaccine. Anti-gE specific antibodies against varicella-zoster virus will be measured using ELISA.

A detailed schedule of blood collection time points, sample volume, and intended use is shown in the table below:

| Visit Time | Test Items and Blood Volume (mL) |
| --- | --- |
| Serum Antibodies |
| Day 0 | 4.0-5.0 |
| 30 Days After Full Immunization | 4.0-5.0 |
| 12 Months After Full Immunization | 4.0-5.0 |
| 24 Months After Full Immunization | 4.0-5.0 |
| 36 Months After Full Immunization | 4.0-5.0 |
| Note: Serum antibody testing uses clot-activator tubes for blood collection. | |

- - - 1. Biological Sample Collection for Suspected Herpes Zoster Cases

At the first and second visits following a report of a suspected herpes zoster case, lesion samples will be collected from the affected skin area for qPCR testing. If vesicles have not appeared at the first visit, sample collection may be scheduled for the second visit. If samples are collected at the first visit and there is no vesicular fluid or crust at the second visit, no additional samples are needed. If lesion samples are available at both visits, samples should be collected at both time points.

For each suspected herpes zoster case, three lesion samples must be collected on the same day from different vesicles or maculopapular lesions. Any one of the following three sampling methods may be used.

a) Polyester Swab Method: Use a sterilized needle to puncture the vesicle, then vigorously rub the base of the ruptured blister with a sterile polyester swab to collect infected epithelial cells. Place the swab directly into a sample tube containing virus preservation solution.

b) Glass Slide Method: Use the edge of a glass slide to scrape the selected maculopapules, ensuring that the slide collects infected epithelial cells. Then, using the same sterile polyester swab, wipe the base of the ruptured lesion and further wipe the edge of the glass slide to obtain infected epithelial cells. Place the swab into a sample tube containing virus preservation solution.

c) Crust Method: Use a glass slide to scrape the crusts from the herpes lesions and place the collected crust directly into a sample tube containing virus preservation solution.

- - - 1. Urine sample collection (pregnancy test)

Women of childbearing age (all women from menarche to menopause) should be tested with a urine pregnancy test before vaccination, which must be performed on the day of vaccination and before each dose. Urine samples do not need to be stored after testing.

- - 1. Vaccination

Subjects in both the vaccine and placebo groups will receive the study vaccine on Day 0 and Day 30. Each subject will undergo a total of 16 visits, including 5 on-site visits and 11 online visits. Subjects in the immunogenicity subgroup will undergo 24 visits in total, including 8 on-site visits and 16 online visits.

For detailed visit schedules and procedures, please refer to the Study Visit Schedule.
For suspected HZ (herpes zoster) cases, visit timing and procedures are outlined in the Visit Schedule for Suspected Herpes Zoster Cases.

- - 1. Follow-up visit
       1. Vaccine efficacy observation

This study is a case-driven trial, collecting all suspected herpes zoster (HZ) cases from the administration of the first dose of the study vaccine until the end of the study.
All suspected HZ cases must be submitted to the Clinical Event Committee (CEC) for adjudication. The detailed adjudication procedures are described in the Clinical Event Committee Charter.
The CEC is established by the CEC Chair and consists of three dermatology experts in accordance with the Clinical Event Committee Charter.

**Suspected Herpes Zoster Cases:** Suspected HZ cases are defined as newly developed, unilateral clusters of vesicles or papulovesicles distributed along a peripheral nerve, typically accompanied by neuralgia, without other identifiable causes.
A suspected HZ case meets at least one of the following diagnostic criteria:

1. Unilateral rash;
2. Vesicles distributed in a dermatomal, clustered pattern along a peripheral nerve;
3. Neuralgia.

**Laboratory-Confirmed Cases:**
Cases that meet the definition of suspected HZ, are VZV qPCR positive, and are adjudicated as herpes zoster by the Clinical Event Committee (CEC).

**Clinically Diagnosed Cases:**
Cases that meet the definition of suspected HZ but lack sufficient or valid samples for laboratory confirmation, or have negative laboratory results, and are adjudicated as herpes zoster by the CEC.

**Efficacy Endpoint Cases:**
Laboratory-confirmed or clinically diagnosed HZ cases, as determined by the CEC, occurring ≥30 days after completion of the full vaccination.

**Adverse Events of Special Interest (AESIs):**
Confirmed HZ cases occurring from the administration of the first dose up to 30 days after the full vaccination.

- - - 1. Safety observation

Collect all AEs (adverse events) within 30 days after vaccination (including solicited AEs within 30 minutes, 0-7 days, and all unsolicited AEs within 0-30 days). Follow-up for pregnancy events from the first dose administration to 6 months after the full vaccination, and for all serious adverse events (SAEs) to 12 months after the full vaccination.

Solicited AEs include:

| Injection site (local) AEs | Pain，pruritus，induration，swelling，rash，redness |
| --- | --- |
| Non-injection site (systemic) AEs | Fatigue, tiredness, fever, headache, insomnia, myalgia, skin and mucosal abnormalities, pain at non-injection sites  , diarrhea, constipation, vomiting, nausea, acute allergic reactions, arthritis, arthralgia |

**Unsolicited AEs include:** Any adverse event that is not a solicited AE or any solicited AE occurring outside the solicitation period (e.g., If the solicited AEs mentioned above occur more than 7 days after vaccination, they should be recorded as unsolicited AEs).

**Collection of AESIs (Adverse Events of Special Interest):**
Suspected cases of herpes zoster within 30 days following the first dose of vaccination to full immunization.

- - - 1. ****Immunogenicity and Immunogenicity Persistence Observation****

Blood samples will be collected from subjects in the immunogenicity subgroup of study LZ901-300 at five time points: prior to vaccination, and at 30 days, 12 months, 24 months, and 36 months after the full vaccination schedule. Varicella-zoster virus glycoprotein E (gE)-specific antibodies will be tested to evaluate the immunogenicity and the durability of the immune response induced by the vaccine.
If the observation period for the immunogenicity subset needs to be extended beyond 36 months, a protocol amendment will be required, and a new informed consent form must be signed.

- - 1. Study Duration

Duration of Participation for Each Subject: Each subject participation duration is from the first visit to the last visit, with an estimated participation time of approximately 13 months per subject. For subjects in the immunogenicity subset, each subject is expected to participate in the study for approximately 37 months.

Study Duration: This is an event-driven trial, and the study duration depends on the accumulation of confirmed herpes zoster (HZ) efficacy endpoint cases. According to statistical calculations, a total of 103 confirmed HZ efficacy endpoint cases are required. Therefore, the observation period may be shortened or extended depending on the actual case accrual.

Visit Duration：Based on the efficacy results, the immunogenicity follow-up period for subjects in the immunogenicity subset may be extended. If the follow-up period is extended, re-consent from the subjects will be required.

- 1. Rationale for the Selection of the Study Design
     1. Rationale for the Selection of the Control Vaccine

Aluminum Hydroxide Adjuvant is used as the adjuvant in the recombinant zoster vaccine. It has the same appearance as the recombinant herpes zoster vaccine and is therefore selected as the placebo (control product) to evaluate the vaccine protective efficacy and safety. Both the experimental vaccine and the placebo are administered as a two-dose schedule on Day 0 and Day 30, with a dose of 0.5 mL per administration.

- - 1. LZ901 Preclinical trial data
       1. Comparison of Immunogenicity between LZ901 Vaccine and ShingrixTM Vaccine in BALB/c Mice.

Two weeks after the second immunization, the specific antibody titers (GMT) in mice induced by the LZ901 vaccine and ShingrixTM vaccine were 53.8 and 67.7 times higher, respectively, compared to three weeks after the first dose. The VZV gE GMT for LZ901 and ShingrixTM vaccines were 46,144 and 69,941 (P > 0.05), with no significant difference between the two, indicating that the humoral immune response levels induced by the LZ901 and ShingrixTM vaccines are comparable. After immunization with the LZ901 vaccine, mouse lymphocytes stimulated with VZV gE showed that 100% of CD4+ T cells expressed at least two activation markers, and 90% of CD8+ T cells expressed at least two activation markers. Among them, 90% of the gE-specific CD4+ T cells expressed IFN-γ, and 85% of the gE-specific CD8+ T cells expressed CD40L. After immunization with the ShingrixTM vaccine, mouse lymphocytes stimulated with VZV gE showed that 70% of CD4+ T cells expressed at least two activation markers, and 85% of CD8+ T cells expressed at least two activation markers. Among them, 65% of the gE-specific CD4+ T cells expressed IFN-γ, and 85% of the gE-specific CD8+ T cells expressed CD40L. The expression of other cytokines induced by the LZ901 vaccine was slightly higher than that of the ShingrixTM vaccine. Both the LZ901 and ShingrixTM vaccines induced a Th1-type cell-mediated immune response characterized primarily by the secretion of IFN-γ.

- - - 1. Toxicity test of repeated intramuscular injection of LZ901 vaccine for 12 weeks in SD rats with 4 weeks of recovery period

LZ901 vaccine was administered via repeated intramuscular injections to SD rats at doses of 1 dose/rat and 3 doses/rat (50 μg/dose), with a dosing schedule of once every 3 weeks for a total of 12 weeks (5 doses in total). During the administration period, the main observations included local injection site irritation and immune response related increases in FIB and cytokines IL-2 and IL-6. No significant systemic toxicity reactions were observed, and the no observed adverse effect level (NOAEL) was determined to be 3 doses/rat (50 μg/dose). At both the 1 dose/rat and 3 doses/rat (50 μg/dose) levels, local injection site irritation was noted. LZ901 vaccination induced the production of certain levels of VZV gE-specific IgG antibodies and neutralizing antibodies in SD rats, with no signs of immunotoxicity.

- - - 1. Active systemic anaphylaxis test of LZ901 vaccine in guinea pigs

A total of 36 female guinea pigs were used in this study. Animals were randomly assigned by body weight into four groups: negative control group, positive control group, low-dose test article group, and high-dose test article group, with 9 females in each group. The negative control group received sodium chloride injection. The positive control group received human serum albumin, with a sensitization dose of 20 mg/animal and a challenge dose of 40 mg/animal. The low- and high-dose test article groups received the LZ901 vaccine, with sensitization doses of 0.1 dose/animal and 1 dose/animal (50 μg/dose), and challenge doses of 0.2 dose/animal and 2 doses/animal (50 μg/dose), respectively. Sensitization was administered via intramuscular injection every other day for a total of 3 doses. Challenge was administered via intravenous injection into the foot vein. On Day 19 (14 days after the final sensitization), the first 3 animals in each group were challenged. On Day 26 (21 days after the final sensitization), the remaining 6 animals in each group were challenged. After challenge, all animals were observed for signs of allergic reaction. All surviving animals were euthanized at the end of the observation period. Under the conditions of this study, no allergic reactions were observed in guinea pigs sensitized by intramuscular injection at the doses of 0.2 and 1 dose/animal (50 μg/dose), and challenged by intravenous injection at the doses of 0.4 and 2 doses/animal (50 μg/dose), respectively.

- - - 1. Reproductive toxicity study of LZ901 vaccine

This study used a total of 336 SD rats (224 females and 112 males), which were randomly divided into 4 groups by gender (28 males/group; 56 females/group). The groups were as follows: negative control group (administered 0.9% sodium chloride injection), adjuvant control group (administered adjuvant control substance—recombinant zoster vaccine (CHO cells) placebo), low and high dose test groups (administered recombinant zoster vaccine (CHO cells) at doses of 1 dose (50 µg) per rat and 3 doses (150 µg) per rat). The vaccine was administered by intramuscular injection in the hind limb, with doses of 0.5 mL per rat and 1.5 mL per rat, respectively. Clinical observations were conducted throughout the study, including checks on the body weight, food intake, and reproductive abilities of the parent female and male rats. At gestation day (GD) 20, cesarean section was performed on female rats to inspect embryonic and fetal development, fetal appearance, bones, and internal organs. After birth, F1 offspring survival, body weight, and physical and reflex development were monitored. Additionally, serum levels of herpes zoster specific IgG antibodies and neutralizing antibodies in both the GD20 pregnant females, fetal rats, and F1 offspring were measured.

Under the conditions of this study, LZ901 vaccine was administered by intramuscular injection to SD rats before mating, during pregnancy, and through lactation at doses of 1 dose per rat and 3 doses per rat. No significant adverse effects were observed on fertility, pregnancy, and lactation in the parental female and male rats, except for local swelling at the injection site in the 3dose group. No embryotoxicity, teratogenicity, or effects on F1 offspring growth and development were observed. Therefore, the No Observed Adverse Effect Level (NOAEL) for LZ901 vaccine in terms of reproductive toxicity, embryonic and fetal development, and offspring growth and development was determined to be 3 doses per rat. Furthermore, all dose groups of SD rats showed high levels of anti-VZV neutralizing antibodies. Offspring born through normal delivery exhibited higher levels of anti-VZV neutralizing antibodies compared to those born via cesarean section.

- - 1. Phase I/II Clinical Trial Data

The recombinant zoster vaccine developed by our company has completed Phase I and Phase II clinical trial, evaluating its safety, tolerability, and immunogenicity in healthy individuals aged 50 to 70.

- - - 1. Phase I clinical trial

The Phase I clinical trial in healthy individuals aged 50-70 years was conducted with a 0 and 1month immunization schedule, administering one dose of the experimental vaccine or placebo to the deltoid muscle, and a 0 and 2month immunization schedule, administering one dose of the positive control vaccine (ShingrixTM) to the deltoid muscle. The trial results showed:

Adverse event rates in the high-dose group, low-dose group, placebo group, and positive control group (ShingrixTM) were 30.00%、50.00%、20.00% and 100.00%, respectively. The adverse event rate in both the experimental vaccine groups was similar to that in the placebo group, but significantly lower than in the positive control group. The severity of adverse events was mainly Grade 1, requiring no treatment and resolving spontaneously.

Humoral Immunity: In both high-dose and low-dose groups, the seroconversion rate for anti-gE antibodies (ELISA) 1 month after full immunization was 100%, with antibody levels of 23.73 IU/mL and 24.84 IU/mL, respectively, representing a 16.88 and 34.04fold increase from baseline. The seroconversion rate for anti-VZV antibodies (FAMA) was also 100%, with geometric mean titers (GMT) of 512.00 and 194.01, respectively, reflecting a 36.76 and 13.93fold increase from baseline. The GMT for anti-VZV antibodies was significantly higher in the high-dose group compared to the low-dose group. There were no significant differences between the high-dose, low-dose groups, and the positive control group in terms of the seroconversion rate, seroconversion rate, or 2fold increase in anti-gE and anti-VZV antibodies.

Cellular Immunity: 30 days after full immunization, the proportion of gE-specific CD4+ and CD8+ T cells expressing two or more cytokines (IFN-γ, TNF-α, IL-2, and CD40L) was 85.00%、65.00%、20.00%、75.00%, and 70.00%、55.00%、25.00%、45.00%, and 45.00% in the high-dose, low-dose, placebo, and positive control groups, respectively. Both the high-dose and low-dose experimental groups, as well as the positive control group, showed significantly higher levels than the placebo group. There were no significant differences between the high-dose, low-dose experimental groups, and the positive control group, although the high-dose test group exhibited a slight advantage.

- - - 1. Phase Ⅱ clinical trial

在A Phase II clinical trial was conducted in healthy individuals aged 50-70 years to evaluate the immunogenicity and safety of the vaccine. The trial involved administering one dose of the experimental vaccine (either 100μg per dose high-dose or 50μg per dose low-dose) or placebo to the deltoid muscle at 0 and 30 days, with 150 subjects in each group. The trial results showed:

- Subjects in both the low-dose and high-dose vaccine groups exhibited significantly higher humoral immune responses, including anti-gE and anti-VZV antibodies, compared to the placebo group. There were no significant differences between the high-dose and low-dose vaccine groups in terms of seropositivity, seroconversion rates, or the 2fold increase rate.
- At 30 days afterthe full immunization, the anti-gE antibody concentrations in the high- and low-dose vaccine groups were 24.84 IU/mL and 15.95 IU/mL, respectively, representing 21.92 fold and 17.24 fold increases from baseline. The GMTs of anti-VZV antibodies were 265.03 and 184.49, corresponding to 5.00-fold and 3.81-fold increases from baseline. The high-dose group showed significantly higher anti-gE antibody levels compared to the low-dose group (p < 0.0001), and the GMT of anti-VZV antibodies in the high-dose group was also significantly higher than that in the low-dose group (p = 0.0017), suggesting a potential dose-response relationship for the investigational vaccine.
- The incidence of solicited adverse reactions related to vaccination in the low-dose, high-dose, and placebo groups were 20.00%, 26.85%, and 11.26%, respectively. Both vaccine groups had a higher incidence of adverse reactions than the placebo group, with similar incidence rates between the low-dose and high-dose vaccine groups. The severity of adverse reactions was mostly grade 1, and the reactions were self-alleviating.

In conclusion, the recombinant zoster vaccine demonstrated acceptable safety and tolerability. The high-dose group (100μg per dose) did not show a significant difference in safety compared to the low-dose group (50μg per dose); however, the high-dose group exhibited certain advantages in terms of anti-gE antibody levels and cellular immunity. Therefore, the immunization schedule for the Phase III clinical trial of LZ901 will select the 100μg per dose recombinant zoster vaccine administered at 0 and 30 days, with two doses in total.

- 1. Access to Study Intervention After Study Completion

Subjects may potentially benefit from receiving the experimental vaccine, specifically by gaining protection against disease caused by the varicella-zoster virus. If a subject is assigned to the placebo group and therefore does not receive the potential benefit of protection against disease caused by the varicella-zoster virus, the sponsor will, after unblinding, offer the company’s marketed recombinant zoster vaccine(CHO cells) in a two-dose schedule free of charge to placebo group subjects, at an appropriate time point and based on the subject willingness.

- 1. Start and End of the Study

The start of the Phase III clinical trial will be marked by the first trial initiation meeting. The end of the study will occur once the conditions for the final analysis have been met.

1. Study Population
   1. The selection of the study population

This Phase III clinical trial will be a multicenter study. The LZ901-300 trial aims to enroll approximately 26,000 subjects aged 40 years and older.

- 1. The selection basis for the study population

The primary objective of this Phase III clinical trial is to evaluate the protective efficacy and safety of the recombinant zoster vaccine (CHO cells) in adults aged 40 years and older. In accordance with relevant regulations and guidelines on vaccine clinical trials issued by the Center for Drug Evaluation (CDE) of the National Medical Products Administration (NMPA), the study is designed to assess efficacy and safety specifically in this age group, which aligns with the age range associated with a higher incidence of varicella-zoster virus disease. Individuals who do not meet the inclusion criteria will not be eligible for enrollment and no waivers will be granted.

- 1. Inclusion criteria

1. Age 40 years or older on the day of enrollment, regardless of gender, and able to provide legal identification.
2. Able to understand the trial procedures, voluntarily agree to participate in the study, and sign the "Informed Consent Form."
3. Female subjects are not pregnant or lactating. Female subjects with childbearing potential should take reliable contraceptive measures, and have no pregnancy and fertility plan within 7 months;
4. Axillary temperature ≤ 37.0°C/99.0℉ on the day of enrollment.
5. Able to attend all scheduled follow-up visits and able to comply with protocol requirements.
   1. Exclusion criteria

The following criteria should be assessed at the time of study entry. If any of the exclusion criteria apply, the subject must not be enrolled in the study:

1. History of herpes zoster within the past 5 years.
2. Previous vaccination with varicella vaccine or zoster vaccine (including use of registered products or participation in clinical trials for varicella or zoster vaccines).
3. Allergy to any component of the study vaccine: Previous allergy to any recombinant vaccine derived from CHO cells (such as recombinant hepatitis B vaccine [CHO cells]), polysorbates, or a history of severe allergic reactions* to any vaccination.
   *Severe allergic reactions: Anaphylactic shock, allergic laryngeal edema, allergic purpura, thrombocytopenic purpura, localized allergic necrotic reaction (Arthus reaction), severe urticaria, etc.
4. Diagnosis of immune deficiency diseases (such as congenital or acquired immunodeficiency, HIV infection, etc.), or receiving immunosuppressive/cytotoxic treatment (e.g., chemotherapy, organ transplantation, or planned treatment during the clinical trial within 6 months before vaccination).
5. Subjects who received immunosuppressive therapy within 3 months before vaccination, or planning to receive such treatment within 1 month after full immunization (e.g., long-term use of systemic glucocorticoids for ≥ 14 days, dose ≥ 2 mg/kg/day or ≥ 20 mg/day prednisone or equivalence);
6. Receiving an inactivated vaccine, recombinant vaccine, or mRNA vaccine within 14 days or any live vaccine within 28 days prior to vaccination;
7. Subjects with acute illness or in the acute phase of a chronic disease within 3 days prior to vaccination.
8. Asplenia or splenectomy.
9. Subjects who receive blood products or immunoglobulin therapy within 3 months before vaccination, or planning to use such products within 2 months after vaccination.
10. Participating in other clinical studies of investigational or un-registered products (drugs, vaccines or devices, etc.), or planning to participate in other clinical studies before the end of this clinical study.
11. Any significant underlying medical condition (e.g., life-threatening diseases that may limit survival to less than 4 years) or other conditions that the investigator believes may interfere with the completion of the study.

**Exclusion Criteria for the Second Dose**

The investigator will terminate the administration of the second dose of the study vaccine if any of the following occur:

1. Any serious adverse event (SAE) related to the vaccination;
2. Severe allergic reaction following vaccination;
3. Suspected varicella-zoster virus (VZV) infection after the first dose of immunization;
4. Discovery of any new condition that meets the "exclusion criteria for the first dose";
5. Any other reason, as determined by the investigator, that requires discontinuation of the study vaccine administration.
   1. Screening Failure

Screening failure refers to a situation where a subject has signed the informed consent form and agreed to participate in the study, but is not randomly assigned or included in the study. To ensure transparent reporting of screening failures, partial information about the subjects, including demographic details and reasons for screening failure, will still be recorded in the database.

Subjects who do not meet the eligibility criteria for participation in the study prior to enrollment (when the inclusion and exclusion criteria specified in the protocol are temporarily not met) may undergo re-screening. During re-screening, the subject screening number should remain the same as the one assigned during the initial screening.

1. Study intervention
   1. Study intervention procedure
      1. Subject recruitment

The study will be conducted in accordance with all applicable regulatory requirements. This study will also be conducted in accordance with the International Council for Harmonisation (ICH) Guideline for Good Clinical Practice (GCP), all applicable subject privacy requirements, and the principles outlined in the Declaration of Helsinki. Once the study sites are determined and ethical committee approval is obtained, before the study begins, the investigator or their authorized representative will issue recruitment notices to subjects who meet the inclusion criteria regarding age, vaccination history, and health status. These subjects will be contacted and registered, and invited to participate in the study.

- - 1. Informed Consent

The informed consent process should be completed before any study procedures are conducted. Prior to enrollment, the investigator will provide the subject and/or their legal guardian with relevant information about the study. The subject and/or their legal guardian, along with the investigator, will sign the Informed Consent Form, in duplicate. One copy will be retained by the subject, and the other will be kept at the study site.

- - 1. Screening

The investigator will inquire about the subject medical history, vaccination history, and other relevant information based on the "Inclusion and Exclusion Criteria." All subjects will undergo axillary temperature measurement and physical examination, including height, weight, skin examination, blood pressure, etc. Women of childbearing age will also undergo a urine pregnancy test. The investigator will record the screening information and demographic data (such as date of birth, gender, and ethnicity) in the "Vaccination and Follow-up Record Book."

- - 1. Randomization of Subjects

Eligible subjects who pass screening will be assigned a study number in sequential order, which will be used to identify all procedures conducted after the subject is enrolled.

All subjects will be stratified by study center and age group (40–49 years, 50–59 years, 60–69 years, and ≥70 years), and will be randomly assigned in a 1:1 ratio to the experimental vaccine group or the placebo group through a centralized randomization system. The system will assign a corresponding vaccine number based on the subject randomization group, and the subject will receive the vaccine according to the assigned number.

Immunogenicity Subgroup: Approximately 3,000 subjects will be selected for inclusion in the immunogenicity subgroup. These subjects will be randomly assigned in a 1:1:1:3 ratio to three experimental vaccine lots (Batch numbers: 20230201, 20230202, 20230203) and one placebo batch group.

- - 1. Sample Collection

Subjects in the immunogenicity subgroup (accounting for approximately 12% of all participants in the LZ901-300 study) will have blood samples collected at five time points: prior to vaccination, 30 days after the full vaccination schedule (for immunogenicity assessment), and at 12, 24, and 36 months post-vaccination. The collected samples will be tested for anti-gE antibody levels to evaluate the immunogenicity and long-term persistence of the immune response induced by the vaccine.

At the first and second visits following a report of a suspected herpes zoster case, lesion site samples will be collected for qPCR testing. If vesicular lesions are not present at the first visit, sample collection may be scheduled for the second visit. If a sample is collected at the first visit and there is no vesicular fluid or scab at the second visit, no additional sample collection is required. If lesion samples are available at both visits, samples should be collected at both time points. For each suspected herpes zoster case, three lesion samples must be collected on the same day from different vesicles or maculopapular lesions, using any one of the three available collection methods.

All women of childbearing potential (from menarche to pre-menopause) must undergo a urine pregnancy test prior to each dose. The urine pregnancy test must be performed on the day of vaccination and prior to each dose.

Detailed information on sample collection is provided in Section 4.1.1.

- - 1. The first dose of vaccination

Subjects will receive the first dose of the vaccine on the day of enrollment, according to their assigned study number.

- - 1. The second dose of vaccination

Subjects will receive two doses of the recombinant zoster vaccine (CHO cells), developed by Beijing Luzhu Biotechnology Co., Ltd. and Luzhu Biopharmaceuticals (Zhuhai) Co., Ltd., or the corresponding placebo, following a 0- and 30-day immunization schedule.

Subjects in both the experimental vaccine group and the placebo group will receive the second dose on Day 30, with a dosing window of –2 to +7 days.

If a subject presents with a relative or absolute contraindication, vaccination should be delayed or discontinued in accordance with the procedures described in Section 7.1.1.

Both the experimental vaccine and placebo will be administered via intramuscular injection in the deltoid muscle of the upper arm.

The dosage and administration schedule are provided in the table below:

| Group | Study Intervention | Dose | Vaccination Time | |
| --- | --- | --- | --- | --- |
| D0 | D30 |
| Experimental Group | Recombinant zoster vaccine (CHO cells) | 0.5mL/dose | √ | √ |
| Placebo Group | Recombinant Zoster Vaccine Placebo | 0.5mL/dose | √ | √ |

- - 1. Medical Observation

After each dose of the study vaccine, the subject must be observed on-site for 30 minutes. The investigator will provide the subject with a Diary Card, thermometer, pen, and ruler, and guide them on how to measure and record their body temperature (axillary temperature) for 7 days after vaccination (the day of vaccination and the following 7 days), as well as record all adverse events. The subjects will be trained on how to use the thermometer and ruler, and how to monitor for adverse events and complete the Diary Card. A time will be scheduled for the collection of the Diary Card on day 7 after vaccination, along with the distribution of the Contact Card, and instructions on how to record all adverse events occurring between days 7-30 after vaccination. The Contact Card will be collected and reviewed 30 days after each dose of the vaccine. The Reminder Card will be issued 30 days after full immunization.

The investigator will emphasize the researcher phone number on the Informed Consent Form and Diary Card, and instruct the subjects to immediately contact the investigator if they experience any symptoms or signs they consider severe or if they experience an event requiring hospitalization.

The Reminder Card will be issued 30 days after full immunization. Investigators will emphasize to subjects the importance of promptly contacting the investigator using the phone number provided on the Reminder Card in the event of suspected herpes zoster symptoms and/or a serious adverse event (SAE), and will guide them on the next steps to take (see Section 6.1.9.2 for details).

- - 1. Efficacy Follow-up

This study is an event-driven trial, designed to collect all confirmed HZ efficacy endpoint cases occurring from the administration of the first dose of the study vaccine through the end of the study. The specific follow-up plan is as follows:

- - - 1. Follow-up Time

Case-driven follow-up time: Related to the number of collected HZ efficacy endpoint cases; follow-up continues until the target number of efficacy endpoint cases is reached and 90 days have passed since the last HZ suspected case follow-up.

- - - 1. Case collection and follow-up

1) Herpes zoster case surveillance:

- 1. Passive surveillance:
- From the day of the first vaccination until the end of the study, if a subject experiences a suspected case of herpes zoster, they should promptly contact the site investigator according to the instructions provided in the Diary Card, Contact Card, Informed Consent Form, or Reminder Card. Upon receiving the report, the investigator must contact the subject within 48 hours to conduct the first herpes zoster visit.
  1. Active surveillance：
- From 30 days after full vaccination until 1 year post-vaccination, investigators shall follow up with subjects monthly (either through on-site visits or online visits) to collect and record suspected herpes zoster cases and subjects survival status.
- From 1 year post-vaccination until the end of the study, investigators shall follow up with subjects approximately every 3 months (either through on-site visits or online visits) to collect and record suspected herpes zoster cases and subjects survival status.

**The following visit time and procedures must be completed for suspected herpes zoster cases:**

**Table of Visit Time for Suspected Herpes Zoster Cases**

| **Number of visits** | **HZ-V1** | **HZ-V2** | **HZ-V3** | **HZ-V4** | **HZ-V5** |
| --- | --- | --- | --- | --- | --- |
| **Visit Time** | **D01** | **D42** | **D283** | **D43** | **D904** |
| **Visit window** | **+48h** | **+3day** | **+14day** | **+14day** | **+42day** |
| Complete the Suspected Herpes Zoster Case Investigation Form | ■ | ■ | ■ | ■ | ■ |
| Take photographs of the rash lesions | ■ | ■ |  |  |  |
| Collect samples from the rash lesions | ■ | ■ |  |  |  |
| Collect 4.0–5.0 mL of blood | ■ |  | ■ |  |  |
| Distribute the ZBPI questionnaire | ■ | ■ | ■# | ■## |  |
| Collect and verify the ZBPI questionnaire |  | ■ | ■# | ■## | ■## |
| 1. The day the investigator first receives the suspected herpes zoster case report is designated as Day 0 (which may not necessarily be the onset date of herpes zoster). 2. The timing of visits should be determined based on the progression of the rash and the initial photography and sample collection, preferably within 7 days after symptom onset. 3. Day 28 after the initial herpes zoster report. 4. If postherpetic neuralgia (PHN) occurs, subjects should be observed for at least 28 days after pain resolution. #: Subjects should complete the ZBPI daily for 28 days following the first visit for the suspected herpes zoster case. ##: Subjects should complete the ZBPI weekly from Day 28 to Day 90 following the first visit for the suspected herpes zoster case. | | | | | |

**Regarding the Suspected Herpes Zoster Case Investigation Form：**

a) The investigation form should include at least the following information: onset and end dates; history of varicella/herpes zoster; recent exposure history; recent factors contributing to immunosuppression; rash characteristics; pain status; location of lesions; complications; disease course and outcome; medications taken during the herpes zoster episode (including medications for herpes zoster treatment) and vaccination status; hospitalization due to herpes zoster; clinical diagnosis and confirmed diagnosis of HZ.

b) Definition of onset date: the earlier of the following two events: (1) date of onset of HZ rash; or (2) date when pain was first noticed at the site where HZ rash subsequently developed.
Definition of sampling time: the earliest time at which vesicular fluid can be collected from a suspected HZ case.

c) Definition of end date: (1) crusting and shedding of the rash; and (2) resolution of herpes zoster–related pain and other sequelae (if any).

d) If herpes zoster associated pain or other sequelae have not resolved by Day 90 after the onset of herpes zoster, the end date should not be recorded, and a note stating "not resolved" should be added. (If the subject continues to be followed until the end of the study and the herpes zoster–associated pain or other sequelae subsequently resolve, the end date should then be completed.)

- - 1. Safety Follow-up
       1. Follow-up Time

1. After each vaccine dose, the subject will be observed on-site for 30 minutes to monitor for any immediate adverse events.
   (2) After each vaccine dose, subjects will be given a Diary Card containing information on potential adverse events. Subjects are instructed to measure their temperature daily and record all local and systemic adverse events from the day of vaccination to day 7, as per the instructions on the Diary Card.
   (3) On day 7 after each vaccine dose, subjects will return the Diary Card, and the researcher will review and document any adverse reactions. Additionally, a Contact Card will be issued to the subjects to record adverse events from day 7 to day 30 after each dose.
2. From the first vaccination until 12 months after full vaccination, serious adverse events (SAEs) will be collected, as well as pregnancy events up to 6 months after full vaccination.
3. At each visit, investigators should emphasize that subjects may contact them at any time using the phone numbers provided on the Diary Card, Contact Card, Informed Consent Form, or Reminder Card.
4. Each subject should undergo one on-site visit or online visit per month from Visit 5 to Visit 7, and one on-site visit or online visit every 3 months from Visit 7 to Visit 9. If, in the immunogenicity subgroup, an on-site visit coincides with a scheduled online visit, the online visit may be waived.
   - - 1. Follow-up Content

The safety observation content includes all adverse events (AEs) and serious adverse events (SAEs) that occur during the study, such as: pain, pruritus，induration，swelling，rash，redness, fatigue, tiredness, fever, headache, myalgia, etc. It also includes the occurrence of all SAEs from the first dose of vaccination through 12 months after the full immunization, and all pregnancy events occurring within 6 months after the full immunization.

Solicited AEs include:

Solicited adverse events: refer to the following adverse events occurring within 7 days after administration of the study vaccine

| Injection site (local) AEs | Pain，pruritus，induration，swelling，rash，redness |
| --- | --- |
| Non-injection site (systemic) AEs | Fatigue, tiredness, fever, headache, insomnia, myalgia, skin and mucosal abnormalities, pain at non-injection sites  , diarrhea, constipation, vomiting, nausea, acute allergic reactions, arthritis, arthralgia |

**Unsolicited AEs include:** Any adverse event that is not a solicited AE or any solicited AE occurring outside the solicitation period (e.g., If the solicited AEs mentioned above occur more than 7 days after vaccination, they should be recorded as unsolicited AEs).

**Serious Adverse Events (SAEs)**
This study will collect all SAEs occurring from the first dose of vaccination until 12 months after the full immunization.

**Pregnancy Events**All pregnancy events occurring from the first dose of vaccination until 6 months after the full immunization will be collected. Details on pregnancy reporting, follow-up, and assessment are provided in Section 8.5.

**Specially Monitored Adverse Events**Suspected cases of herpes zoster occurring from the first dose of vaccination until 30 days after the full immunizationwill be collected.

- - 1. Concomitant Medications

During each visit or contact after vaccine administration and before the return of the Diary Card/Contact Card, the investigator must inquire whether the subject has taken any medications, received any treatments, or been vaccinated with any vaccines. All concomitant medications/vaccines (except for vitamins, and/or food additives) must be recorded on the Diary Card/Contact Card. The investigator should transcribe the concomitant medications into the electronic case report form (eCRF). The data management team will use the World Health Organization Drug Dictionary (WHO DD) to code concomitant medications.

Concomitant Medications/Vaccines: These refer to all medications taken by the subject, excluding the study vaccine, from the first dose until 30 days after the last dose of the vaccine. This includes antibiotics, antivirals, antipyretic analgesics, antihistamines, biologics (vaccines), Chinese medicine (and traditional medicine), etc. (excluding vitamins or food supplements). The data management team will use the WHO DD to code the concomitant medications.

Medication Record: In order to understand the impact of medications used during the study on vaccine safety or to collect any potential AEs related to vaccination without omissions, the investigator must collect information about the medications taken by the subject during the observation period. The investigator should guide the subject and/or their legal guardian to record medical visits and medication use in the Diary Card/Contact Card, and the investigator must transcribe all medications taken within 30 days after vaccination into the eCRF.

- - - 1. Restricted Medications

At enrollment, the investigator should inquire about any medications the subject is currently using to ensure that the subject has not been taking antipyretics, analgesics, or antihistamines.
Preventive medications are those used to prevent potential solicited adverse events (AEs) that may occur during the solicitation period following vaccination. For example, if an antipyretic is taken to prevent the onset of fever when no fever is present, that antipyretic would be considered a preventive medication.

- - - 1. Allowed Medications

**Allowed Vaccines:** Vaccine use should follow the inclusion/exclusion criteria. Emergency vaccination (such as rabies or tetanus vaccination) is permitted and should not be restricted, but vaccine use must be recorded accurately as required. For vaccines included in the immunization schedule, live attenuated vaccines should be administered at least 28 days before the study vaccine, while inactivated vaccines, recombinant vaccines, or mRNA vaccines should be administered at least 14 days before the study vaccine. After receiving the study vaccine, other vaccines should be administered at least 14 days later.

**Allowed Medications:** During the study, if a subject experiences an adverse event, necessary medication treatment is allowed, and medication usage must be recorded accurately as required. In this study, as contraception is required for subjects, the use of contraceptives is permitted. However, any medication use must be accurately documented as required.

- 1. ****Basis for Intervention Selection****

The recombinant zoster vaccine (CHO cells) (code name: LZ901 vaccine) used for this clinical trial application was developed by Beijing Luzhu Biotechnology Co., Ltd. and Luzhu Biopharmaceutical (Zhuhai) Co., Ltd. It is produced by expressing the varicella-zoster virus glycoprotein E (gE) fusion protein in CHO cells using genetic engineering technology. The LZ901 cell line, which carries the target gene, is cultured in a chemically defined medium. The cell culture fluid is harvested and undergoes multi-step liquid chromatography purification, low-pH incubation, and nanofiltration to inactivate and remove viruses, resulting in a high-purity recombinant herpes zoster glycoprotein E bulk solution. This bulk solution is then adsorbed onto an aluminum hydroxide adjuvant to formulate the vaccine at an appropriate concentration. Each vial contains 0.5 mL of vaccine, with a single human dose of 0.5 mL, containing 100 μg of antigen. The recombinant zoster vaccine developed by the company is an aluminum-adjuvanted recombinant protein vaccine. Based on the results from Phase I/II clinical trials, the selected formulation contains 100 μg of recombinant varicella-zoster virus glycoprotein E per dose, adsorbed onto an appropriate amount of aluminum hydroxide adjuvant.

- 1. Dosage and Administration

The study vaccine is administered at a dose of 0.5 mL per person, injected intramuscularly into the deltoid muscle. As with all vaccines, the vaccination site should be equipped with appropriate emergency medical measures and have medications such as epinephrine available for use in case of a severe allergic reaction. After vaccination, the subject should be observed on-site for 30 minutes.

- 1. Preparation, Handling, Storage, and Counting
     1. ****Preparation of Study Intervention****

The preparation and administration of both the study vaccine and the control vaccine will be carried out by authorized medical personnel who are not involved in the clinical assessment.The study vaccine is a ready-to-use liquid formulation intended for direct injection.

- - - 1. Experimental vaccine

Common name: Recombinant zoster vaccine (CHO Cells)
Manufacturer: Luzhu Biopharmaceuticals (Zhuhai) Co., Ltd.
Lot Number: 20230201、20230202、20230203
Specification: 0.5 mL/vial
Expiration Date: 2025/02/12、2025/02/14、2025/02/16
Active Ingredient: Recombinant Varicella-Zoster Virus Glycoprotein E (gE) 100 μg
Adjuvant: Aluminum Hydroxide Adjuvant

- - - 1. Placebo

Common name: Recombinant Zoster Vaccine Placebo

Manufacturer: Luzhu Biopharmaceuticals (Zhuhai) Co., Ltd.

Lot Number: 20230204

Specification: 0.5ml/ vial

Expiration Date: 2025/02/20

Ingredient: Aluminum Hydroxide Adjuvant

If the vaccine batch used in the trial differs from the one specified in the protocol, the responsible organization must explain and file the change with the Ethics Committee before the clinical trial begins (or as required by the IRB).

- - 1. Blinding of Study Interventions

The study employs a partially blinded design, where vaccine blinding is carried out by the randomization statistician and other blinding personnel. According to the randomization code, pre-printed vaccine labels are applied to designated locations on each vaccine. The randomization statistician supervises the blinding process, guiding blinding personnel to label the vaccines according to the randomization code. Once blinding is complete, the randomization code should be sealed by the randomization statistician. The entire blinding process must be documented in writing. Blinding personnel are prohibited from participating in any other tasks related to this study and must not disclose the randomization code to any study personnel.

- - 1. Handling and Storage of Study Interventions

The study vaccine should be stored and transported at 2-8°C, protected from light, and must not be frozen (depending on the specific characteristics of the vaccine). The storage temperature should be monitored twice daily (once in the morning and once in the afternoon) and recorded. If the temperature monitoring system includes automatic alerts, the temperature may be monitored and recorded based on the local circumstances during holidays. If the storage or transportation conditions fall outside the specified range, the site staff should immediately contact the study unit and the sponsor. The vaccine should not be used until approval is received from the sponsor.

- - 1. Packaging and Labeling

The outer packaging (small box) and inner packaging (vaccine vial) of the study vaccine should be affixed with labels bearing the same identification number. Additionally, one pre-printed adhesive label with the same identification number should be placed inside the small box for use in the subject vaccination and visit record booklet. The label includes the following information:

1. Outer Packaging Label (Large Box): Protocol number, product name, specification, lot number, expiration date, inside the small box, storage temperature, study sponsor, and the label “For Clinical Trial Use Only” should be printed on the large box.
2. Small Box Vaccine Outer Packaging Label: Protocol number, product name, specification, vaccine lot number, expiration date, and vaccine number.
3. Vaccine Vial Label: The study vaccine name, lot number, expiration date, manufacturer, and the label “For Clinical Trial Use Only.” A label containing the protocol number, product name, and vaccine number should be placed over the original label on the vaccine vial.
4. Adhesive Label (for the vaccination and follow-up record book): Protocol number, vaccine number.

After the vaccine is activated, the subject initials should be written on both the outer packaging label of the individual vaccine vial and the inner label (to be placed in the vaccination and visit record book). The administering personnel should verify the details before administering the corresponding vaccine based on the assigned number.

- - 1. Inventory of Study Interventions

All study drugs shipped to the study site should be accompanied by a quality control report, shipping list, and a receipt confirmation form for site personnel to use. The shipping of study drugs must have complete written documentation, which typically includes the name or code of the study drug, dosage form, specification, lot number or drug code, quantity, expiration date, sponsor, manufacturing entity, packaging type, storage requirements, recipient institution and address, contact information, shipping date, transportation method, and temperature monitoring measures during transit.

Returned study drugs should not be reused in the study. Only after confirming the balance of the quantities of distributed, used, and returned study vaccines can unused and returned study vaccines be destroyed. Destruction must be fully documented, including at least the reason for destruction, date of destruction, relevant lot numbers and/or drug codes, actual quantity destroyed, person responsible for destruction, and supervisor. Destruction records are retained by the sponsor.

- - 1. ****Backup vaccine****

A total of 4,000 doses of backup vaccines will be prepared. If anystudu vaccine is found to be damaged during the trial, investigators may obtain a backup vaccine number corresponding to the assigned group through the randomization system and administer a backup vaccine labeled with the corresponding number. (Investigators will only see the randomization number; the actual group assignment of the study and backup vaccines will have been preloaded into the system and will remain blinded throughout the study. Additional backup vaccines may be provided at any time if the supply becomes insufficient.)

- 1. Subject Assignment, Randomization, and Blinding
     1. ****Randomization of Subject****

Randomization of subjects occurs after screening. Subjects who meet the screening criteria are sequentially assigned a subject identification number, which is used to track all study procedures occurring after enrollment.

All subjects are stratified by study site and by age group (40–49 years, 50–59 years, 60–69 years, and ≥70 years) and randomized in a 1:1 ratio to receive either the experimental vaccine or the placebo using a centralized randomization system. Based on the assigned randomization group, the system matches the subject to a corresponding vaccine number, and the subject is administered the vaccine labeled with the assigned number.

Immunogenicity Subgroup: Approximately 3,000 subjects will be selected to form the immunogenicity subgroup. These subjects will be randomized in a 1:1:1:3 ratio into three investigational vaccine batches (Batch Numbers: 20230201, 20230202, and 20230203) and one placebo batch.

- - 1. ****Randomization****

A centralized randomization system will be used to generate randomization codes and allocate subjects. To leverage higher-than-expected recruitment rates at individual sites within this multicenter study and thereby shorten the overall enrollment period, over-randomization of the study vaccines will be planned. Considering the size of the randomized groups, an estimated number of subjects for each center will be determined, and study vaccines will be allocated to each study site based on these estimates.

- - 1. Blinding and Unblinding
       1. Blinding

This study is designed as a double-blind study. Vaccine blinding will be performed by the randomization statistician along with other designated blinding personnel, who will affix pre-printed vaccine labels to the designated positions on each vaccine package according to the blinding list. The randomization statistician will supervise the vaccine blinding process and instruct the blinding personnel to label the vaccines strictly according to the blinding list.

Upon completion of the blinding process, the blinding list must be sealed and stored by the randomization statistician. The entire blinding procedure must be documented in writing. Blinding personnel are prohibited from participating in any other aspects of this clinical trial and must not disclose the blinding information to any trial staff involved in the study. The preparation and administration of the study vaccine/placebo will be performed by authorized medical personnel who are not involved in the clinical evaluation of the subjects.

An Independent Data Monitoring Committee (IDMC) will be established to conduct safety evaluations. The IDMC, established by the sponsor, will independently and periodically review safety data during the clinical trial and provide recommendations to the sponsor regarding the continuation of the study.

- - - 1. Blinding Maintenance

A placebo-controlled design is used in this study. After serological results are obtained, even without direct access to the randomization code, it may be possible to infer a subject group assignment (study vaccine or placebo), leading to unintended unblinding. To maintain the blind, designated serological data management personnel will be responsible for handling serological result data. These individuals must not participate in any other aspects of the clinical trial and must not disclose any data that could potentially lead to unblinding to any personnel involved in the conduct of the study prior to official unblinding. The following measures will be taken to maintain the blind throughout the study:

1. During the course of the study, subjects, investigators, and any project team members involved in endpoint evaluation, data review, or data analysis shall not have access to the randomization information.
2. After the vaccines are packaged and blinded, they must not be unsealed or opened without authorization.
3. After completing vaccine preparation procedures, vaccinators will administer vaccines to subjects sequentially, guided into the vaccination room by designated staff. Each vaccination room must have a dedicated person responsible for vaccine administration.
4. Vaccine administrators and vaccine managers must be assigned exclusively to their respective roles and are prohibited from participating in any other aspects of the study. Both must sign confidentiality agreements committing not to disclose any information that could potentially lead to unblinding to any other personnel, including investigators involved in clinical assessments, subjects, serological testing staff, blinded monitors and quality control personnel, or data management personnel.
5. Vaccination personnel must place the used vaccine vials and boxes back into their original outer packaging. At the end of each day, all used vaccine vials and boxes must be counted and promptly transferred to the vaccine manager for storage. The vaccine manager must not open the outer packaging to inspect the contents when handling either unused vaccines or used vaccine vials/boxes. After site closure and with authorization from the sponsor, all materials shall be uniformly transferred for destruction by a licensed medical waste disposal company or by the sponsor, with proper destruction records maintained.
6. Monitoring and quality control activities related to vaccine management and administration shall be carried out by designated monitors and quality control personnel.
7. In addition, during the study, neither the subjects and/or their legal guardians, investigators, nor any project team members involved in endpoint evaluation, data review, or data analysis shall have access to randomization information. Investigators assigned to the vaccination team are only authorized to administer vaccines and must not engage in other clinical assessment activities such as diary card collection or follow-up visits.
8. Immunogenicity and/or immunology subgroup serological testing reports issued by the third-party central laboratory will be received by sponsor personnel who are not otherwise involved in the study. The designated serological data management personnel from the data management unit will be responsible for reviewing and verifying the results. Before study unblinding, no serological results may be disclosed to trial-related personnel to ensure the maintenance of blinding. Even after unblinding, the randomization code must not be disclosed to the serological testing staff at the central laboratory or to site personnel, and the blind must continue to be maintained.
   - - 1. Unblinding Procedures

In this study, after reaching the planned primary analysis time point, a blinded data review will be conducted. Upon confirmation of the data accuracy and reliability, the database will be locked. Unblinding will then be performed after database lock to enable primary analysis. At this unblinding, the assignment of each subject to either the study vaccine or placebo group will be revealed. The unblinding process will be initiated by the project statistician and, upon approval by the sponsor, the randomization statistician will release the randomization code to the project statistician.

If a cluster of adverse events occurs, or if the study is interrupted for any reason, unblinding may be conducted earlier upon mutual agreement between the sponsor and the investigators.

- - - 1. Emergency Unblinding

During the study, individual emergency unblinding may only be conducted if a serious adverse event (SAE) occurs, the subject requires emergency rescue or treatment, and the product information is critical for the subject clinical management. In such cases, a researcher with unblinding authority at the study site should access the Clinflash IRT system to document the reason for unblinding and initiate emergency unblinding. The researcher must report the unblinding within 24 hours to the principal investigator or lead sub-investigator, promptly notify the sponsor and the sponsor designated CRO, and provide a written explanation to the sponsor.

The study will be terminated for the subject with the specific study number (while safety follow-up will continue), and the reason for termination should be documented in the case report form.

The investigator or any other physician managing the subject should contact the sponsor to discuss the necessity of emergency unblinding.

An emergency unblinding request should only be made if there is a medical emergency or serious condition where the study vaccine information is crucial to the subject clinical care or welfare.

The sponsor will permit unblinding only if the investigator responsible for the subject believes that the medical event cannot be managed without knowing the identity of the study vaccine.

- 1. Study Intervention Compliance

To ensure and document vaccination information and compliance with study interventions, subjects are required to remain on-site for 30 minutes after each dose of the study vaccine. The researcher provides each subject with a Diary Card, thermometer, and ruler, instructing them to measure and record their body temperature (axillary temperature) and note any adverse events for 7 days following vaccination. Subjects are trained on how to use the thermometer and ruler, how to observe adverse events, and how to complete the Diary Card. The Diary Card is collected on day 7 post-vaccination, at which time subjects are also given a Contact Card for recording all adverse events occurring from day 7 to day 30 post-vaccination. The Contact Card shall be collected and reviewed 30 days after the first vaccination, and again at the time of blood collection 30 days after the full immunization. At the same time, the Reminder Card shall be issued..

1. Discontinuation of Study Intervention and Subject Withdrawal from the Study
   1. Discontinuation of Study Intervention
      1. Postponement Criteria for the Second Vaccination

The study intervention (second dose of vaccine) should be suspended (or delayed) until the situation resolves in the following cases:

1. Axillary temperature > 37.0°C/99.0℉ ;
2. Acute illness within 3 days prior to vaccination (e.g., acute upper respiratory infection with symptoms such as fever, cough, sore throat, difficulty breathing) or during an acute stage of a chronic disease, or use of antipyretics, analgesics, or antihistamines;
3. Insufficient interval between vaccinations (receiving an inactivated vaccine, recombinant vaccine, or mRNA vaccine within 14 days prior to vaccination, or any live attenuated vaccine within 28 days prior to vaccination);
4. Any Grade 3 or higher adverse event on the day of vaccination;
5. For suspected herpes zoster (HZ) cases, vaccination is permitted outside the designated window period after HZ has been ruled out and the subject's symptoms are no longer in the acute phase.
6. Other circumstances where the investigator considers vaccination should be delayed.
   - 1. Exclusion Criteria for the Second Dose

The investigator will terminate the administration of the second dose of the study vaccine if any of the following occur:

1. Any serious adverse event (SAE) related to the vaccination;
2. Severe allergic reaction following vaccination;
3. Suspected varicella-zoster virus (VZV) infection after the first dose of immunization;
4. Discovery of any new condition that meets the "exclusion criteria for the first dose";
5. Any other reason, as determined by the investigator, that requires discontinuation of the study vaccine administration.
   1. Subject Withdrawal from Study
      1. Criteria for Subject Withdrawal from Study

A subject will be withdrawn from the study if any of the following conditions occur:

1. Development of intolerable severe adverse events or any condition that makes the subject unsuitable to continue participation in the study.
2. Occurrence of a severe allergic reaction related to the experimental vaccine, and the investigator assesses that the subject is no longer suitable to continue in the study.
3. The subject voluntarily withdraws from the study.
4. Poor compliance, failure to adhere to the study protocol, or loss to follow-up.
5. If an enrolled subject develops a condition during the study that makes continued participation unsuitable, and the investigator assesses that the risks of participation outweigh the potential benefits, the investigator may decide to withdraw the subject from the study.
   - 1. Reasons for Subject Withdrawal

Subjects may discontinue their participation in the study at any time and for any reason. The investigator should inform subjects that they have the right to withdraw from the study at any time, and withdrawn subjects will not be replaced. Subjects who withdraw due to SAE/AE should be distinguished from those who withdraw for other reasons. The investigator will follow up with subjects who withdraw due to SAE/AE until the issue is resolved.

If no study procedures, follow-ups, or further information collection occur from the date of withdrawal/last contact, the subject is considered to have "withdrawn" from the study.

All data collected up to the withdrawal date/last contact will be used for analysis. The eCRF should record information related to the withdrawal, specifying whether the decision to withdraw was made by the subject or the investigator and indicating which of the following reasons led to the withdrawal:

- Serious adverse event (SAE)
- Non-serious adverse event (AE)
- Protocol deviation
- Withdrawal of informed consent (not due to an adverse event)
- Relocation from the study site
- Loss to follow-up
- Death
- Other (with detailed explanation)
  1. Discontinuation of Study Vaccine

A subject is considered to have discontinued the study vaccine if they do not receive the complete series of study vaccinations, meaning that from the date of discontinuation, they no longer receive any of the planned study vaccines. Subjects who discontinue the study vaccine are not necessarily withdrawn from the study. Depending on the circumstances, the investigator may arrange for them to continue completing other study procedures or visits as specified in the protocol (e.g., for safety or immunogenicity assessments).

Information related to early discontinuation of the study vaccine will be recorded in the eCRF. The investigator will document whether the decision to stop further vaccination/treatment was made by the subject or the investigator, along with the specific reason, which may include:

- Serious adverse event (SAE).
- Non-serious adverse event.
- Other (with specific details)
  1. Loss to Follow-Up

Loss to follow-up refers to a situation where a subject, for any reason, is unable to continue through to the final follow-up visit as required by the study protocol. The investigator will attempt to contact subjects who do not return for scheduled visits or follow-up.

- 1. Criteria for study suspension

1. New data regarding the study vaccine obtained from this study or any other study, or management reasons suggesting that the risks outweigh the benefits, prompting the sponsor, investigator, and/or ethics committee to recommend a suspension;
2. The occurrence of a serious adverse event that is potentially life-threatening or leads to the subject death, which may be related to the vaccination;
3. If ≥ 15% of subjects experience Grade 3 or higher adverse events during the study, these events do not resolve to below Grade 3 within 48 hours.

If the study is suspended, the ethics committee (IRB) and provincial or national drug regulatory authorities or relevant departments must be notified. An expert meeting will be conducted to assess safety, and a blinded analysis may be conducted if necessary to determine whether the study should continue. The study may resume once safety, protocol compliance, and data quality issues are resolved and the requirements of the sponsor, ethics committee, and/or national regulatory authorities are met.

- 1. Criteria for study termination

1. Reaching the study endpoints;
2. Any subject experiencing a life-threatening or fatal serious adverse event related to the study vaccine during the study;
3. The incidence of ≥ Grade 3 adverse reactions related to the study vaccine was ≥15% during the post-vaccination follow-up period.

If the study is terminated early, the sponsor will immediately notify the investigator, clinical trial institution, ethics committee, and regulatory authorities of the reason for termination in accordance with the relevant regulatory requirements. The investigator should report to the clinical trial institution and IRB, providing a detailed written explanation.

Regardless of the reason for suspension or termination, the investigator must immediately inform the subjects and ensure appropriate follow-up is conducted..

1. Study Evaluation and Procedures
   1. Screening Evaluation and Procedures

The study will be conducted in accordance with all applicable regulatory requirements. Additionally, the study will comply with the International Council for Harmonisation of Technical Requirements for Pharmaceuticals for Human Use (ICH) Good Clinical Practice (GCP) guidelines, all relevant subject privacy requirements, and the principles of the Declaration of Helsinki. After identifying the study sites and obtaining ethics committee approval, the investigator or their authorized representative will distribute recruitment notices to subjects who meet the age, vaccination history, and health status requirements before the study begins, and contact and register these individuals, inviting them to participate in the study.

The informed consent process must be completed before any study procedures are conducted. Before enrollment, the investigator will inform the subjects about the study, and both the subject and the investigator will sign two copies of the Informed Consent Form, one for the subject and one to be retained at the study site.

The investigator will assess eligibility by conducting an inquiry based on the "Inclusion and Exclusion Criteria," obtaining information on the subject medical and vaccination history, and performing axillary temperature checks and physical examinations for all subjects, including measurements of height, weight, skin condition, and blood pressure. Women of childbearing age will undergo a urine pregnancy test. Screening information and demographic data (such as birth date, gender, and ethnicity) will be recorded in the Vaccination and Follow-up Record Book.

- 1. Evaluation and Procedures for Vaccine Efficacy

The follow-up period and follow-up assessments for vaccine efficacy are detailed in Section 6.1.9. The vaccine efficacy analysis cohort will include only those subjects who did not violate the inclusion/exclusion criteria, were randomized, and developed a confirmed HZ efficacy endpoint case during the follow-up period starting 30 days after administration of the second dose.

- - 1. Specimen Collection

At the first and second visits following a report of a suspected herpes zoster case, lesion samples will be collected from the affected skin area for qPCR testing. If vesicles have not appeared at the first visit, sample collection may be scheduled for the second visit. If samples are collected at the first visit and there is no vesicular fluid or crust at the second visit, no additional samples are needed. If lesion samples are available at both visits, samples should be collected at both time points.

For each suspected herpes zoster case, three lesion samples must be collected on the same day from different vesicles or maculopapular lesions. Any one of the following three sampling methods may be used.

a) Polyester Swab Method: Use a sterilized needle to puncture the vesicle, then vigorously rub the base of the ruptured blister with a sterile polyester swab to collect infected epithelial cells. Place the swab directly into a sample tube containing virus preservation solution.

b) Glass Slide Method: Use the edge of a glass slide to scrape the selected maculopapules, ensuring that the slide collects infected epithelial cells. Then, using the same sterile polyester swab, wipe the base of the ruptured lesion and further wipe the edge of the glass slide to obtain infected epithelial cells. Place the swab into a sample tube containing virus preservation solution.

c) Crust Method: Use a glass slide to scrape the crusts from the herpes lesions and place the collected crust directly into a sample tube containing virus preservation solution.

- - 1. Specimen Storage and Transportation

After specimen collection, swabs or scabs should be placed into sampling tubes containing viral transport medium. The specimens must be immediately stored at –20°C or lower within 4 hours of collection and transported on dry ice to the designated laboratory within the specified timeframe. Upon receipt at the laboratory, the specimens should be stored at –70°C or lower.

- - 1. Varicella-zoster virus (VZV)–specific IgG antibody testing

Subjects reported as suspected herpes zoster cases will have 4.0–5.0 mL of blood collected on the day of reporting and again on Day 28. The collected serum will be divided into three parts: one part will be used for testing, with a minimum serum volume of 0.5 mL in the testing tube, and the other two parts will be kept as backups. Varicella-zoster virus (VZV)–specific IgG antibody testing will be performed using the ELISA method. Serum specimens must be kept frozen during transportation, and dry ice should be used if necessary.

- - 1. Pathogen Testing

The National Institute for Viral Disease Control and Prevention will be commissioned to perform varicella-zoster virus (VZV) identification from herpes-like lesions in subjects using real-time quantitative PCR (qPCR) and/or to detect VZV-specific IgG antibodies in subjects serum samples using the ELISA method.

- - 1. Endpoint Event Determination

All suspected HZ cases must be submitted to the Clinical Event Committee (CEC) for adjudication. The detailed adjudication process is described in the CEC Charter. The CEC is established by the CEC Chair and operates in accordance with the CEC Charter. The committee consists of three experts in dermatology. A case is considered a confirmed endpoint only if it is unanimously approved by at least two or more CEC members.

- 1. Safety Evaluation and Procedures
     1. Physical Examination

A physical examination will be performed prior to each vaccination.

- - 1. Vital Signs

Vital signs will be assessed prior to each vaccination.

- - 1. Safety Assessment

The safety analysis cohort will include all subjects who meet the following criteria:

- Have received at least one dose of the study vaccine or control vaccine according to randomization;
- Have sufficient data for safety analysis (at least one dose and follow-up for safety);
- Have not received other prohibited medications or vaccines per protocol.

For detailed information on the safety follow-up time and content, please refer to Section 6.1.10

- 1. Adverse events and serious adverse events
     1. Definitions of AE and SAE

Adverse Event (AE): Refers to any undesirable medical occurrence experienced by a subject after receiving the study drug. This can include symptoms, signs, diseases, or abnormal laboratory results, but it does not necessarily have a causal relationship with the study drug.

Serious Adverse Event (SAE): Refers to any adverse medical occurrence experienced by a subject after receiving the study drug, meeting any of the following criteria:

1. Results in death;
2. Is life-threatening, meaning the subject was at immediate risk of death at the time of the adverse event (not to be confused with potential risks of death if the condition worsens);
3. Results in hospitalization or prolongation of an existing hospitalization;
4. Results in persistent or significant disability/incapacity;
5. Leads to a congenital anomaly or birth defect;
6. Other important medical events.

Medical and scientific judgment should be used to decide whether to expedite the report of other situations. Events that may not immediately threaten life, result in death, or require hospitalization but necessitate medical intervention to prevent one of the above outcomes are also generally considered serious.

For further details on AE and SAE definitions, refer to Appendices 11.1 and 11.2.

- - 1. Identification and Documentation of AEs and SAEs

During subject training, the importance of promptly reporting adverse events (AEs) is emphasized, and researchers should remain vigilant in identifying, investigating, and managing these events as they occur.

For both solicited and unsolicited AEs experienced by subjects, the researcher should inquire whether the subject required hospitalization, outpatient treatment, or took any medications independently, and these details should be documented. Throughout the study, researchers should carefully observe the subject response to the vaccine without leading questions and encourage truthful reporting.

In the event of a serious adverse event (SAE), the investigator is responsible for reviewing all documents related to the event, such as the subject relevant medical history, hospital progress notes and physician orders, laboratory reports, and diagnostic reports. If a subject is confirmed to have died during the study or follow-up period, a death certificate stating the cause of death should be obtained from the hospital.

Investigators should collect comprehensive case records as much as possible, but these should not replace study records. All information related to an SAE must be recorded in the original records, the eCRF, and the SAE report form. If medical records need to be disclosed for medical review, all personal identifiers should be redacted before release.

Investigators must establish an emergency plan for handling SAEs within the study and train all relevant personnel accordingly. Measures should be in place to promptly detect any clinically significant illnesses/events following vaccination and ensure that subjects receive appropriate care at designated hospitals in line with national regulations and current medical standards. The investigator should document the AE symptoms, onset time, severity, management, and outcome while analyzing its relationship to the study vaccine. Medications used to treat the AE should be recorded in the subject original records and eCRF.

For further details on assessing AE severity, SAE, and causality with vaccine administration, refer to Appendices 12.3 and 12.4.

- - 1. Follow-up for AEs and SAEs

Subjects who experience adverse events (AEs) will be followed up until the event has resolved or improved, returned to baseline, or if the investigator determines that further follow-up is unnecessary, or if the subject is lost to follow-up. For AEs that lead to study termination or remain ongoing at the end of the study, the investigator should continue monitoring. Vaccine-related AEs should be followed until resolution, while unrelated events (such as illnesses) may be concluded once a physician diagnosis is obtained.

In case of disagreements or disputes during AE management, the investigator must cooperate with the sponsor to address the issue and assist the subject with medical evaluation if necessary. The sponsor has the obligation and responsibility to unconditionally ensure subject safety, providing humane care and compensation for subjects experiencing vaccine-related AEs during the study.

- - 1. SAE Reporting

For any SAE occurring during the study, the investigator must inform the principal investigator, principal sub-investigator and sponsor within 24 hours of awareness via phone, email, or online reporting. A complete written report on the Serious Adverse Event Report Form should be submitted, detailing the full description of the adverse reaction/event, onset time and type, duration, intensity, causality with vaccination, outcome, treatment (symptomatic), and other relevant clinical and laboratory data. After the initial SAE report, the investigator should continue to monitor the SAE, submitting follow-up reports with new or updated information, including any changes to the previous report and event outcomes, focusing on unresolved/unrecovered or improving/relieving SAEs until a definitive outcome is reached. For hospitalized subjects, the investigator should obtain the hospital records, which include the full progression and outcome of symptoms, all drug treatments, and detailed medical records. This information should be promptly reported as new or updated information.

The investigator should track the subject SAE outcome and aim to follow up until symptoms resolve, completing a summary report. For medically irreversible conditions, follow-up should continue until symptoms stabilize, return to pre-treatment levels, or when an alternative explanation is provided, completing the summary report.

In cases involving death, the investigator must report to the sponsor and ethics committee, providing an autopsy report (if available) and a final medical report.

- - 1. SAE Regulatory Reporting Requirements

The investigator is responsible for promptly reporting SAEs to the sponsor (and to the ethics committee, if required) to enable the sponsor to fulfill their responsibilities. The sponsor must immediately analyze and assess all SAEs reported by the investigator, including evaluating their severity, causality with the study vaccine, and whether the event was anticipated. Any SAE identified by the sponsor as a suspected unexpected serious adverse reaction (SUSAR) must be promptly reported to all participating investigators, study sites, ethics committees, and the National Medical Products Administration's Center for Drug Evaluation (CDE) within seven days, with follow-up information provided within the subsequent eight days. If the sponsor and investigator cannot reach an agreement on the causality assessment between the adverse event and the vaccine, a prompt report should still be made if either party deems it impossible to rule out a connection with the study vaccine.

- - 1. Suspected Unexpected Serious Adverse Reaction (SUSAR)

A SUSAR is a serious adverse reaction whose nature and severity exceed what is outlined in the Investigator’s Brochure, the approved product label, or summary of product characteristics for marketed drugs.

During vaccine clinical trials, the sponsor is required to promptly report any confirmed or suspected SUSARs related to the study vaccine to the research team, ethics committee, Center for Drug Evaluation (CDE), and national health authorities. Upon receiving a SUSAR report from the sponsor, the investigator should immediately submit it to the ethics committee. If the sponsor and investigator disagree on causality with the vaccine but either party considers a connection possible, the sponsor must still expedite the report.

For SUSARs that are life-threatening or fatal, the sponsor must report as soon as possible within seven days of first awareness, with follow-up information provided within the subsequent eight days (note: the day the sponsor first becomes aware is day 0). For SUSARs that are non-fatal and non-life-threatening, the report must be made as soon as possible within 15 days of awareness. The sponsor should also promptly report any other potential serious safety risks to the national drug evaluation authorities, providing medical and scientific assessments for each case. The sponsor must continue to follow up on SAEs, submitting additional information or updates to the previous report within 15 days of receiving new data.

In the event of a SUSAR, the sponsor, investigator, ethics committee, or regulatory authorities have the authority to propose pausing or terminating the study.

- - 1. Adverse Events of Special Interest (AESIs)

Collection of AESIs (Adverse Events of Special Interest): confirmed HZ (herpes zoster) cases occurring from the first dose through 30 days after full vaccination.

- - 1. Disease-Related Events Not Meeting AE or SAE Criteria

1. Elective surgeries planned before subject enrollment are not reported as SAEs.
2. Pregnancy itself is not considered an AE.
   - 1. Development Safety Update Report (DSUR)

The sponsor must submit the Development Safety Update Report (DSUR) to the National Medical Products Administration's Center for Drug Evaluation (CDE), all investigators and clinical study sites, and the ethics committee in accordance with regulatory and ethics committee requirements. The DSUR should include relevant information on SAEs occurring within twelve months after full immunization and an assessment of the study risks and benefits.

- 1. Pregnancy and Postpartum Information

Pregnancy is an exclusion criterion for each vaccine dose, and women of childbearing potential are required to use effective contraception for seven months following the first vaccine dose. However, accidental pregnancies may still occur during participation. Any pregnancy occurring from the time of vaccination through six months after full immunization must be reported, and the investigator is required to complete a "Pregnancy Event Report Form."

Researchers will closely follow pregnant subjects to obtain pregnancy outcome information (e.g., details of delivery and newborn status, or termination of pregnancy) and update the "Pregnancy Event Report Form."

Pregnancy itself is not considered an AE, but any complications during pregnancy are considered AEs and, in certain cases, may be classified as SAEs, such as spontaneous abortion, stillbirth, or congenital anomalies in the infant. Elective abortions due to personal choice, where no fetal abnormalities are present, are not considered adverse events.

**Handling Pregnancy Events During Vaccination:**

If pregnancy occurs after the first dose but before the completion of the full vaccination course, the subject should not receive the second dose until the pregnancy ends (whether full-term, miscarriage, or abortion). The investigator will maintain regular contact with the subject for pregnancy assessments.

If pregnancy is discovered after the subject has completed the full vaccination course, the subject may complete study visits per the protocol and investigator discretion.

- 1. Evaluation of Immunogenicity and Immune Persistence

For immunogenicity and immunological persistence analyses (including the immunogenicity subset, accounting for approximately 12% of all subjects in LZ901-300), the evaluable subjects (i.e., subjects who met all inclusion criteria, adhered to the procedures and intervals defined in the protocol, and had no exclusion criteria during the study) had their immunogenicity (pre-vaccination and 1 month after full vaccination) and immunological persistence endpoints (at 12, 24, and 36 months after full vaccination) assessed using ELISA for anti-gE antibody GMC. The seroconversion rate, anti-gE antibody GMC, and geometric mean fold increase after vaccination compared to baseline were used to evaluate the subject immunogenicity or immunological persistence.

- - 1. Biological sample collection

Blood sample collection is detailed in Section 4.1.1.1, sample collection for suspected herpes zoster cases is detailed in Section 4.1.1.2, and urine sample collection is detailed in Section 4.1.1.3.

- - 1. Storage and handling of biological samples

**Biological samples for immunogenicity and immunological persistence：**

Collect 4.0–5.0 mL of venous blood. Serum should be separated within 24 hours and divided into three tubes: one for testing and two for backup. The testing tube should contain no less than 0.5 mL of serum. All samples should be stored at temperatures below –20°C. During transportation, serum samples must be kept frozen, and dry ice should be used if necessary.

- - 1. Biological sample labeling rules

The biological samples should be labeled according to the subject study identification number. Specific labeling requirements should follow the relevant SOP.

- - 1. Biological sample testing

**Biological samples for immunogenicity and immunological persistence**

A third-party testing laboratory was commissioned to measure the anti-gE antibody levels in subjects' serum samples using the ELISA method.

**Biological samples from suspected herpes zoster cases**

A third-party testing laboratory was commissioned to detect the presence of VZV DNA in vesicle fluid or scab samples from subjects using the qPCR method.

1. Statistical considerations
   1. Analysis set

The Intent-to-Treat (ITT) analysis set includes all randomized subjects.

**The modified Intent-to-Treat Set (mITT)** includes all subjects who followed the ITT principle, were randomized, and received at least one dose of the study vaccine.

**The Per-Protocol Set for Efficacy (E-PPS)** includes all subjects who met the inclusion/exclusion criteria, were randomized, and completed the full vaccination, excluding: (1) subjects in the vaccination cohort who did not receive the second dose or had a confirmed HZ case within 30 days after the second dose; and (2) subjects with protocol deviations that would significantly impact the efficacy assessment (data collected before the deviation may still be included in the analysis).

**The Full Analysis Set for Immunogenicity (I-FAS)** includes all subjects in the immunogenicity subset who followed the ITT principle, were randomized, completed the full vaccination, and had available immunogenicity results both before vaccination and at 30 days after the full vaccination. Subjects who received the incorrect vaccine were evaluated according to their originally randomized group for immunogenicity assessments.

**The Per-Protocol Set for Immunogenicity (I-PPS)** includes all subjects in the immunogenicity subset who met the inclusion/exclusion criteria, were randomized, completed the full vaccination, and had available immunogenicity results both before vaccination and at 30 days after the full vaccination, excluding subjects with protocol deviations that could significantly impact the immunogenicity evaluation (data collected prior to the protocol deviation may still be included in the analysis).

**The Full Analysis Set for Immunogenicity Persistence (IP-FAS)** includes all subjects in the immunogenicity subset who followed the ITT principle, were randomized, completed the full vaccination, and had available immunogenicity results at least once among the time points of 12 months, 24 months, or 36 months after the full vaccination, in addition to the pre-vaccination result. Subjects who received the incorrect vaccine were evaluated according to their originally randomized group for immunogenicity assessments.

**The Per-Protocol Set for Immunogenicity Persistence (IP-PPS)** includes all subjects in the immunogenicity subset who met the inclusion/exclusion criteria, were randomized, completed the full vaccination, and had available immunogenicity results at least once among the time points of 12 months, 24 months, or 36 months after the full vaccination, in addition to the pre-vaccination result, excluding subjects with protocol deviations that could significantly impact the immunogenicity evaluation (data collected prior to the protocol deviation may still be included in the analysis).

**The Safety Set (SS)** includes all subjects who received at least one dose of the study vaccine.
In this study, the safety analysis for each dose will be based on the actual number of subjects who received the corresponding vaccination. Specifically, the Safety Set for Dose 1 includes all randomized subjects who received the first dose of the study vaccine, and the Safety Set for Dose 2 includes all randomized subjects who completed the second dose of the study vaccine.
The final definitions of the analysis sets will be determined during the data blind review meeting, through joint discussion among the principal investigators, the sponsor, the statistical team, and the data management team, prior to database lock.

- 1. Statistical hypotheses

This study includes one primary endpoint hypothesis (vaccine efficacy hypothesis) and one secondary endpoint hypothesis (lot-to-lot consistency hypothesis). The vaccine efficacy hypothesis will be tested first. If the null hypothesis for vaccine efficacy is rejected, the lot-to-lot consistency hypothesis will subsequently be tested.

Vaccine efficacy hypothesis testing: The hypothesis is that, in subjects aged 40 years and older who receive two doses of the study vaccine according to a 0 and 30 day immunization, the lower bound of the 95% confidence interval (CI) for vaccine efficacy (VE) against confirmed HZ endpoint cases at 30 days after the full vaccination is greater than 25%. The null hypothesis is that the lower bound of the 95% CI for VE is less than or equal to 25%, that is:

- H₀ : The lower bound of the 95% confidence interval (CI) for vaccine efficacy (VE) is ≤ 25%.
- H₁ : The lower bound of the 95% CI for vaccine efficacy (VE) is > 25%.

Lot-to-Lot Consistency Hypothesis Testing: The hypothesis is that the geometric mean concentrations (GMCs) of anti-gE antibodies at 30 days after the full vaccination are equivalent among the three different lots of the study vaccine, based on pairwise comparisons. The statistical hypotheses are as follows:

- H₀: For at least one pairwise comparison between vaccine lots, the GMC ratio is ≤ 0.67 or ≥ 1.5.
- H₁ : For all pairwise comparisons between vaccine lots, the GMC ratios are > 0.67 and < 1.5.
  1. Sample size determination

Vaccine Efficacy Testing: In this study, it is assumed that the expected vaccine efficacy (VE) will reach 65%, with a 1:1 allocation ratio between the vaccine group and the placebo group. Using a one-sided significance level of 0.025 and achieving approximately 95% statistical power, the study aims for the lower bound of the 95% confidence interval (CI) for VE to be greater than 25%. At least 103 confirmed herpes zoster (HZ) endpoint cases must be observed for the primary analysis. Assuming an annual incidence rate of HZ of approximately 8‰ in the placebo group during the observation period, a non-completion rate of about 8% for the full vaccination, and an annual dropout rate of approximately 15%, the study plans to enroll approximately 26,000 subjects (about 13,000 subjects per group). This study adopts a case-driven design based on clinically or laboratory-confirmed HZ cases. The study will be considered complete when at least 103 valid endpoint cases have been accumulated and the last subject has completed the 12-month visit. Each subject is expected to participate in the study for approximately 13 months. Based on the monitoring of endpoint case accrual, the possibility of extending the observation period will be assessed.

Lot-to-Lot Consistency Testing: Assuming that the geometric mean concentration (GMC) ratios of anti-gE antibodies at 30 days after the full vaccination between each pair of the three vaccine lots are equal to 1, with a coefficient of variation (CV) of 2.5, a one-sided significance level of 0.025, and each lot having 425 evaluable subjects, the study will have greater than 90% statistical power to demonstrate lot-to-lot consistency. Considering an approximate dropout rate of 15%, 500 subjects per lot will be enrolled.

- 1. Analysis methods
     1. General Principles

Quantitative data will be statistically described using mean, median, standard deviation, maximum, and minimum values. Categorical or ordinal data will be presented with frequency and percentage. Antibody levels for immunogenicity indicators will be expressed using geometric mean, median, maximum, minimum values, and 95% confidence intervals. Antibody levels will undergo log transformation for statistical analysis.

All statistical analyses will be conducted using SAS software version 9.4 or higher.

- - 1. Vaccine efficacy

The primary analysis of vaccine efficacy (VE) will be conducted based on the Per-Protocol Set for Efficacy (E-PPS). A Poisson regression model will be used to analyze vaccine efficacy, calculating the incidence rates per person-year and the corresponding 95% confidence intervals (CIs) for the vaccine group and the placebo group. The incidence rate ratio (IRR) between the vaccine and placebo groups will be estimated, along with its 95% CI. Vaccine efficacy (VE) will be calculated as: VE = 100 × (1 – IRR).

- - 1. Immunogenicity

Immunogenicity will primarily be analyzed based on the Per-Protocol Set for Immunogenicity (I-PPS) and the Per-Protocol Set for Immunogenicity Persistence (IP-PPS).

An analysis of covariance model will be fitted to the log-transformed geometric mean concentrations (GMCs) of antibodies at 30 days after the full vaccination. In this model, the log-transformed GMC at 30 days post-vaccination will be used as the dependent variable, the log-transformed pre-vaccination antibody concentration will be included as a covariate, and group and age group will be included as fixed effects. Least squares means (LSMs) of the log-transformed GMCs at 30 days post-vaccination and the inter-group differences will be estimated from the model. The LSMs and inter-group differences will then be back-transformed (exponentiated) to obtain the GMCs for each group and the adjusted GMC ratios (vaccine group/placebo group) along with their 95% confidence intervals (CIs).

The seropositivity rate and seroconversion rate (defined as a ≥4-fold increase in antibody levels from pre-vaccination to 30 days after the full vaccination) will be calculated separately for the vaccine group and the placebo group within the immunogenicity subset at 30 days, 12 months, 24 months, and 36 months after the full vaccination. The 95% confidence intervals (CIs) for these rates will be calculated using the Clopper-Pearson method, and differences between groups will be tested using the chi-square test.

The geometric mean concentrations (GMCs) and their 95% CIs will be used to describe the following for the vaccine group and placebo group in the immunogenicity subset at 30 days, 12 months, 24 months, and 36 months post-vaccination: GMCs and fold increases in antibody levels; GMCs and fold increases at 30 days post-vaccination among subjects who were seronegative at baseline; GMCs and fold increases at 30 days post-vaccination among subjects who were seropositive at baseline.

Reverse cumulative distribution plots of antibody concentrations will be generated for both the vaccine group and the placebo group at baseline and 30 days after the full vaccination.

- - 1. Safety

In this study, the primary focus of safety analysis will be on treatment-emergent adverse events (TEAEs). Solicited adverse events will be categorized and summarized by systemic reactions and local reactions, whereas unsolicited adverse events and serious adverse events (SAEs) will be categorized and summarized by system organ class (SOC) and preferred term (PT) according to the MedDRA coding system. Adverse events occurring before vaccination will be listed separately. Unless otherwise specified, adverse events mentioned below refer to TEAEs.

The number of events, number of subjects, and incidence rates for all adverse events, vaccine-related adverse events, and non–vaccine-related adverse events will be calculated separately for the vaccine group and the placebo group. The number of events, number of subjects, and incidence rates will also be calculated separately by group and by dose, at different post-vaccination time points (including within 30 minutes, 0–6 days, and 7–30 days), by severity grade, and for solicited and unsolicited adverse events.

Similarly, the number of events, number of subjects, and incidence rates for all serious adverse events (SAEs), vaccine-related SAEs, and non–vaccine-related SAEs will be calculated separately for the vaccine group and the placebo group.

- 1. Statistical Analysis Plan
     1. Primary Analysis

In subjects included in the Efficacy Per-Protocol Set — excluding (1) subjects from the Total Vaccinated Cohort who did not receive the second dose or developed HZ within 30 days after the second dose; and (2) subjects with protocol deviations that significantly impact the efficacy evaluation (data prior to the deviation may still be included in the analysis) — once at least 103 valid endpoint cases have been accumulated, along with safety data covering at least 6 months after full immunization and immunogenicity results from the immunogenicity subset (measured before the first dose and 30 days after full immunization), and after the completion of data entry, cleaning, and database lock for this portion, statistical analyses of efficacy, safety, and immunogenicity will be conducted.The resulting data will be submitted to the NMPA for regulatory review.

- - 1. Final analysis

After all subjects have completed safety follow-up for 12 months post full immunization, the immunogenicity subset has completed 36 months of follow-up, and data collection for suspected HZ cases, safety outcomes, as well as immunogenicity results at 12, 24, and 36 months post full immunization have been obtained, and after the completion of data entry, cleaning, and database lock for this portion, statistical analyses of HZ protective efficacy, safety, and immunogenicity will be conducted. A final clinical study report will be prepared based on these analyses and submitted to the NMPA as a supplemental report for the Phase III clinical trial.

- 1. Protocol deviation

Protocol Deviations refer to any modifications or actions that do not follow the study protocol design or procedures without prior approval from the ethics committee. Actions that do not impact subject rights, safety, benefits, or the integrity, accuracy, and reliability of trial data, nor affect safety or primary endpoint evaluations, are considered protocol deviations. Actions that impact subject rights, safety, benefits, or the integrity, accuracy, and reliability of trial data, as well as those affecting safety or primary endpoint evaluations, are considered serious protocol deviations (protocol violations).

Examples of protocol deviations (including but not limited to):

1. Subjects did not sign the updated version of the informed consent form in a timely manner.
2. Storage and management of the study vaccine did not follow protocol requirements, or vaccine use was not confirmed as suitable before administration.
3. Diary cards and contact cards were not collected or distributed as required.
4. Other deviations.

Examples of protocol violations (including but not limited to):

1. Subjects entered the study without informed consent.
2. Subjects did not meet any inclusion criteria but were enrolled in the study.
3. Subjects met any exclusion criteria but were enrolled in the study.
4. Subjects did not receive the study vaccine according to the assigned vaccine allocation.
5. Vaccine dose, frequency, or administration route did not comply with protocol requirements.
6. Subjects used prohibited medications or those restricted by the protocol.
7. Subjects met withdrawal criteria but were not withdrawn from the study.
8. Other violations.

For protocol deviations/violations occurring during the study, site investigators must report the facts, process, cause, and impact of the event to the study responsible organization. The principal investigator or lead collaborative investigator should provide guidance on handling the event. Serious protocol deviations/violations must be reported to the ethics committee.

Researchers should provide targeted training for personnel involved in protocol violations to prevent recurrence and document the training process.

1. General Considerations: Regulatory, Ethical, and Trial Oversight
   1. Regulatory and Ethical Considerations

This study will be conducted in accordance with the protocol and the following guidelines:

- Consensus ethical principles derived from international guidelines, including the Declaration of Helsinki and the International Ethical Guidelines by the Council for International Organizations of Medical Sciences (CIOMS).
- ICH Good Clinical Practice (GCP) guidelines.
- Guiding Principles for Quality Management of Vaccine Clinical Trials (Provisional).
  - 1. Investigator Responsibilities

The responsible organization for the vaccine clinical trial should establish a comprehensive organizational and quality management system, including mechanisms and measures to prevent and manage emergencies that may arise during the study. The site is equipped with a comprehensive cold chain system to ensure proper transportation and storage of vaccines.

The study site for the vaccine clinical trial must be approved for vaccination by health authorities and have a stable and enough clinical trial personnel. It must be equipped with standard operating procedures (SOPs) related to vaccine clinical trials, conduct training with records of attendance. Based on the vaccination and visit flow of the vaccine clinical trial, the site should include designated areas for reception, informed consent, consultation and screening, biological sample collection, vaccination, emergency treatment, medical observation, vaccine storage, record-keeping, sample processing and preservation, and temporary medical waste storage. An emergency pathway should be established, and the study site should have an ambulance, related rescue personnel, and emergency supplies available.

All personnel roles and responsibilities must be confirmed by the principal investigator or lead collaborator to ensure that all researchers participating in this project are qualified, trained, and authorized, with clear tasks and mastery of relevant SOPs. The responsible organization and study site personnel should undergo training in GCP and vaccine clinical trial techniques, with training records maintained. Auxiliary personnel should also have records of participation in relevant training.

- - 1. Sponsor Responsibilities

The sponsor holds ultimate responsibility for the quality of the study. The sponsor should establish a comprehensive quality management system for vaccine clinical trials, develop corresponding standard operating procedures (SOPs), and organize audits of the study. Systematic checks of trial-related activities and documentation—including study sites, laboratories, and Contract Research Organizations (CROs)—should be conducted to evaluate whether the study is being carried out according to the protocol, SOPs, and regulatory requirements, and whether study data is recorded promptly, truthfully, accurately, and completely. Audits should be conducted by personnel not directly involved in the study.

The study site should cooperate with study audits, maintain relevant records, and address issues identified during audits by creating improvement plans and implementing appropriate management measures to enhance study quality.

- 1. Ethics Committee

The ethics committee is responsible for reviewing the scientific and ethical soundness of the vaccine clinical trial to ensure the dignity, safety, and rights of subjects, promoting the scientific and healthy development of vaccine trials, and fostering public trust and support.

The lead site and the ethics committees (ECs) of each participating center may independently review the study protocol, informed consent form (ICF), recruitment materials, and any other written information provided to subjects. Each participating center must report the review opinions of its institutional EC to the lead site. In the case of differing opinions, the lead site is responsible for communication and coordination of any necessary revisions. Any revisions to the protocol must be discussed with the sponsor. Revisions to the ICF that do not conflict with the protocol and are consistent with local requirements may be adopted based on the EC recommendations.

- 1. Follow-Up Review

The ethics committee should conduct follow-up reviews for all approved clinical trials until the study is completed.

- - 1. Amendment Review

Any modifications to the study protocol during the study must be submitted to the ethics committee for review and approval or filing before implementation. The ethics committee should request the sponsor and/or investigator to submit relevant information for the amendment review, including (but not limited to):

1. Details and reasons for the modifications;
2. Impact of the modification on anticipated risks and benefits;
3. Impact of the modification on the rights and safety of subjects.

The ethics committee will primarily assess the risks and benefits of the modified protocol and issue a review opinion. If protocol modifications are necessary to prevent immediate harm to subjects, the investigator may implement changes prior to ethics committee approval but must promptly provide a written report to the committee afterward.

- - 1. Annual/Periodic Follow-Up Review

During the initial review, the ethics committee should determine the frequency of annual or periodic follow-up reviews based on the level of study risk, with reviews occurring at least once a year. The ethics committee should require the investigator to submit timely reports, with information for annual/periodic follow-up reviews including (but not limited to):

1. Progress of the study;
2. Number of subjects enrolled, completed, and withdrawn;
3. Confirmation that serious adverse events are reported promptly and handled appropriately;
4. Any events or new information that could affect the study risk-benefit profile.

After reviewing the study progress, the ethics committee will reassess the risks and benefits of the study.

- - 1. Serious Adverse Event Review

The ethics committee must review serious adverse events reported by the sponsor and/or investigator, including the severity and scope of the events, their impact on the study risk-benefit profile, and the medical protection measures in place for subjects.

- - 1. Non-Compliance/Protocol Violation Review

For instances of non-compliance or protocol violations occurring during the study, the ethics committee should require the sponsor and/or investigator to provide an explanation of the cause, impact, and corrective measures for the incident. The committee will review whether the event affects subject safety and rights or the study risk-benefit balance.

- - 1. Early Termination Review

If the sponsor and/or investigator intend to terminate the trial early, they must submit an application for review by the ethics committee. The ethics committee should require the sponsor and/or investigator to report the reasons for the early termination and the follow-up arrangements for the subjects, and should review whether the safety and rights of the subjects are adequately protected.

- - 1. Study Completion Review

The ethics committee should require the sponsor and/or investigator to report on the completion status of the study and review the measures taken to protect the safety and rights of subjects.

- 1. Informed Consent Process

The informed consent process must be completed before any study procedures begin. Prior to enrollment, the researcher should provide the subject with relevant information about the study. Both the subject and the researcher will sign the informed consent form, which will be prepared in duplicate: one copy for the subject to keep and one to be retained at the study site.

- 1. Early Closure of Research Center or Study Termination

If the study is terminated early, the sponsor will promptly notify the investigators, the Institutional Review Board (IRB), and regulatory authorities of the reasons for early termination in accordance with applicable registration regulations.

Regardless of the reason for early termination, the investigator must promptly inform the subjects and ensure appropriate follow-up for them.

After study termination, the study may only continue once issues related to safety, protocol compliance, and data quality are resolved, and requirements from the sponsor, ethics committee, and/or national regulatory authorities are met.

For specific trial termination criteria, refer to Section 7.6.

1. General Considerations: Risk Management and Quality Assurance
   1. Data Quality Assurance
      1. Investigator

The responsible organization for the vaccine clinical trial should establish a comprehensive organizational and quality management system, including mechanisms and measures to prevent and handle emergencies that may arise during the study. It must also have complete equipment for the transport and cold chain storage of vaccines.

The study site must be approved by the relevant health authorities for vaccination and have a stable, adequate number of study personnel. It should be equipped with standard operating procedures (SOPs) related to vaccine clinical trials, maintain training records, and collaborate with local medical institutions to establish an emergency medical treatment pathway for vaccine clinical trial serious adverse events (SAEs). In line with the vaccine study vaccination and visit procedures, the site should include dedicated areas for reception, informed consent, consultation and screening, biological sample collection, vaccination, emergency treatment, medical observation, vaccine storage, record-keeping, sample processing and preservation, and temporary storage of medical waste. An emergency pathway should be in place, and the site should have an ambulance, trained rescue personnel, and emergency supplies.

All roles and responsibilities of the research staff must be confirmed by the principal investigator or lead collaborator, ensuring that all individuals participating in this project are qualified, trained, and authorized, with clear task assignments and knowledge of relevant SOPs. Personnel at the responsible organization and study site must undergo training in Good Clinical Practice (GCP) and vaccine clinical trial techniques, with training records maintained. Auxiliary personnel must also have records of relevant training.

- - 1. Sponsor

The sponsor holds ultimate responsibility for the quality of the study. The sponsor should establish a comprehensive quality management system for vaccine clinical trials, develop corresponding standard operating procedures (SOPs), and organize audits of the study. Systematic checks of trial-related activities and documentation—including study sites, laboratories, and Contract Research Organizations (CROs)—should be conducted to evaluate whether the study is being conducted according to the protocol, SOPs, and regulatory requirements, and whether study data is recorded promptly, truthfully, accurately, and completely. Audits should be conducted by personnel who are not directly involved in the study.

- - 1. Clinical Research Associate (CRA)

The sponsor should assign an adequate number of Clinical Research Associates (CRAs) to monitor the study throughout its duration, as specified in the Guiding Principles for Quality Management of Vaccine Clinical Trials (Provisional). CRAs should have relevant education and work experience in fields such as medicine or pharmacy. The sponsor should determine the number of CRAs based on factors like the required monitoring frequency and the complexity of the trial protocol. CRAs are to perform monitoring activities per the monitoring plan and submit monitoring reports.

CRAs are responsible for overseeing the entire study process to ensure compliance with the protocol, SOPs, Good Clinical Practice (GCP), and relevant regulations, ensuring the study is completed within the planned timeframe.

- - 1. Protocol Amendments

Any modifications to this study protocol must be discussed and approved by the sponsor. If there is consensus on the necessity of the modification, the sponsor will document it in writing, and the revised protocol will replace the previous version. All protocol amendments must be submitted to the Institutional Review Board (IRB); significant amendments (e.g., those impacting trial conduct or subject safety) require IRB approval. Administrative changes that do not affect the trial design, objectives, or subject safety may be submitted for IRB filing or expedited review, as per IRB requirements.

Investigators are responsible for ensuring that any protocol modifications needed during the study are not implemented before IRB review and approval, except when changes are necessary to eliminate immediate risks to the subjects.

- - 1. Biological Sample Management

Blood samples collected from suspected HZ subjects and subjects for immunogenicity testing must be managed by designated personnel. A sample storage and temperature recording system must be established. During working days, the storage temperature must be monitored and recorded daily. (On holidays, temperature monitoring and recording may be arranged according to the specific situation on-site, provided that an automatic temperature monitoring and alarm system is in place.)

A 4.0–5.0 mL venous blood sample should be collected. Serum must be separated within 24 hours and divided into three tubes: one tube for testing and two backup tubes. The volume of the testing tube should be no less than 0.5 mL, and samples should be stored at -20°C or below. During transportation, serum samples must remain frozen, and dry ice should be used if necessary. Backup samples should not be transported together with the testing samples and must be properly stored by the investigator (≤ -70°C) until the clinical report is completed and the sponsor confirms the subsequent handling.

After collection, swabs or scabs should be placed into sampling tubes containing viral transport medium. The samples must be promptly (within 4 hours) stored at -20°C or below, and transported to the laboratory on dry ice within the specified time for testing. Upon arrival, the samples should be stored at -70°C or below.

Blood samples should be transported in a relatively centralized manner to the testing center in accordance with the relevant SOPs.

Strict handover management must be maintained throughout the entire process, and investigators, sample couriers, and laboratories must properly document and retain all relevant records.

- - 1. Vaccine Management

The organization responsible for the vaccine clinical trial should guide the study site in establishing a management system for study vaccines. The processes of receiving, storing, preparing, retrieving, returning, or destroying study vaccines must comply with relevant laws and regulations. Both the responsible organization and the study site should designate personnel trained in Good Clinical Practice (GCP) and related protocols to manage study vaccines.

Vaccine Transportation: Throughout the management process, cold chain requirements must be met, with proper transport and storage conditions as outlined in the protocol. The transportation process should include a shipment list and temperature monitoring. Upon arrival, packaging conditions and opening temperature should be recorded. The recipient must sign the shipment list upon verification and send a faxed or copied record to the sender, with both parties retaining the document.

Vaccine Handover Record: The sponsor will provide the experimental and control vaccines. The investigator, upon receipt, must verify the vaccine name, quantity, and packaging integrity and complete a handover record.

Vaccine Storage and Distribution: Study vaccines must be managed in separate, locked storage units with designated personnel. For blinded studies, measures must be in place to maintain blinding. Upon receiving vaccines, the recipient must verify transport conditions, establish tracking, registration, usage, and retrieval logs, and store them in work records as required.

Vaccine Usage Record: The investigator should maintain a record of vaccine registration and usage. Each dose dispensed to a subject should be documented, including study ID, subject’s initials, and the administering person’s signature. Study vaccines must not be used for non-trial individuals.

Vaccine Retrieval Record: The vaccine manager should retrieve unused vaccines promptly, conduct regular inventory counts, and record the results. If usage and remaining quantities do not match the total amount, an explanation is required. All discarded, expired, or leftover vaccines should be returned to the sponsor. The sponsor, upon receipt, must verify the quantity and complete related records, with signatures from the vaccine manager and sponsor representative.

Cold Chain Disruption: A deviation from the recommended storage temperature range of 2°C to 8°C in the refrigerator used for vaccine storage shall be regarded as a cold chain disruption. The stability profile of the study vaccine shall be described in detail in the Investigator’s Brochure. In the event of a cold chain disruption, the investigator must immediately transfer the affected vaccine(s) to a light-protected environment maintained at 2°C to 8°C and discontinue their use. The incident shall be reported to the sponsor without delay. The decision to continue or discontinue use of the affected vaccine(s) shall be made based on the sponsor’s assessment of the deviation and vaccine stability data.

- - 1. Instrument and Equipment Calibration

Disposable sterile syringes are used for vaccine injection and blood collection, manufactured by licensed companies, with lot numbers and expiration dates recorded.

Measuring instruments such as height gauges, scales, and blood pressure monitors are qualified and in active use.

Thermometers used for monitoring refrigerator temperatures have been calibrated and are within the validity period; continuous temperature monitoring records for three consecutive days are required before the refrigerator is put into use.

Cold storage equipment used on-site for storing vaccines and samples undergoes annual inspection and is in active use.

- - 1. Original Data Management

Documents such as the informed consent form, vaccination and follow-up records, diary cards, contact cards, and SAE report forms serve as essential sources for clinical trial traceability and must be recorded promptly, accurately, completely, standardized, and truthfully. These records should be securely maintained at the study site.

Authorized and specially trained researchers will enter study data from original records into the electronic Case Report Form (eCRF). Data should not be altered arbitrarily; any necessary corrections due to entry errors must be made according to the completion guidelines. To ensure the accuracy and reliability of study data, the eCRF will be jointly reviewed by monitors and researchers. After the researcher signs off on the data, all materials will be submitted to the clinical trial responsible unit or sponsor, who will assign statistical personnel for data processing.

- - 1. Study Documentation

The sponsor and research team must manage study documentation in accordance with the Drug Registration Management Measures and Good Clinical Practice (GCP) guidelines.

Investigator files must be organized in accordance with GCP requirements and maintained separately at each study site. Each site is responsible for organizing and delivering its own documentation to the sponsor. Materials containing subject personal information, such as screening logs, informed consent forms, vaccination and visit record books, diary cards, contact cards, and subject medical records, must be securely archived at each site.

Archive management should follow standard operating procedures (SOPs), with labels that include the project name, completion date, sponsor, and retention period. Safety measures should be in place to prevent pests, moisture, fire, and theft. Access to and use of these records are restricted to the project researchers. However, in compliance with confidentiality principles and relevant regulations, monitors, auditors, ethics review committees, and regulatory authority inspectors may review subjects' original medical records to verify the trial process and data.

The investigator and sponsor should retain study documentation for at least five years after the study vaccine is approved for marketing. Upon reaching the retention period, the investigator should notify the sponsor, and no one may dispose of the records without the sponsor’s written approval.

- 1. Source Data
     1. eCRF Design

The electronic Case Report Form (eCRF) is designed based on the study procedures and flowchart specified in the protocol. After the initial draft is created, it requires a joint review by project team members, including the project manager, data and statistical personnel, and protocol authors. The eCRF must align with the protocol, comply with relevant laws and regulations, and have a documented version control process to ensure traceability and accuracy.

- - 1. eCRF Completion Guidelines

The eCRF Completion Guidelines provide specific instructions for filling out each form and data point on the Case Report Form, based on the study protocol. The study site must receive the eCRF and its completion guidelines before enrolling subjects. Staff at the study site should be trained on the protocol, eCRF completion, and data submission procedures, with this training process documented and archived.

- - 1. eCRF Annotation

The annotated eCRF is a labeled version of the blank eCRF, indicating the location of each data item and its variable name and coding in the database. All data items within the eCRF must be annotated. This annotated version requires review by Data Management (DM).

- - 1. Database Design

The database should be established according to the dataset names, variable names, variable types, and variable lengths as specified in the annotated eCRF, adhering as closely as possible to standard database structures and settings. Upon completion, the database should undergo testing, with a database testing report prepared and signed off by the data management lead for confirmation.

- - 1. Permission Allocation

The system administrator will create accounts for each role and assign specific permissions according to the role requirements.

- - 1. eCRF Completion

Researchers must collect subject data according to the study protocol and reference the completion guidelines to accurately, promptly, completely, and consistently enter information into the eCRF based on original source data. Any modifications to eCRF data must follow standard operating procedures, with audit trails maintained for all changes.

- - 1. Query Issuance and Resolution

The Data Management (DM) department shall draft a detailed Data Review Plan, with participation from the project manager, statisticians, and medical monitors. The plan must be signed and confirmed by all parties after reaching consensus. After data is entered into the Electronic Data Capture (EDC) system, the system will perform data checks according to the Data Review Plan, using pre-established edit checks to identify data queries automatically. For data that cannot be flagged by automated checks, manual queries will be issued through the EDC. Data entry personnel or researchers must review and respond to both system and manual queries, correcting data if necessary until the query is resolved. If the response does not resolve the query, the data manager and clinical research associate may re-query the data point, with all actions and audit trails recorded in the EDC database.

- - 1. Data Modification and Review

Data entry personnel or researchers may modify data after verification. For any data modifications, a reason must be provided in the system as prompted. The researcher has the authority to review and approve all final data.

- - 1. Medical Coding

Medical history and adverse events collected in the study should be coded using standard dictionaries, typically MedDRA and WHODrug Dictionary (WHODD). The dataset with coded data must clearly document the dictionary and version used for coding.

- - 1. SAE Consistency Comparison

All SAE-related data points in the eCRF should be programmatically compared with corresponding data points in the Pharmacovigilance (PV) database. Any discrepancies must be discussed with PV personnel and resolved until there are no differences in the data.

- - 1. Data Review Meeting

Before database lock, the data manager will draft all data listings. The sponsor, researchers, data managers, and statistical analysts will jointly conduct a final review of the database. During this meeting, they will define statistical analysis populations according to the study protocol, verify serious adverse event reports, and review recorded handling information. Following the data review meeting, the finalized minutes of the data review meeting and population classification plan resolutions will be documented.

- - 1. Database Lock and Unlock

Database lock is a key milestone in the study process. The locking process and timing should be clearly documented. Locking restricts edit permissions on the database, preventing any unauthorized accounts from making changes.

If modifications are required after the database is locked, an application must be submitted. The sponsor, researcher, data entry personnel, clinical research associate, and data manager must discuss, approve, and sign off on the request. The reason for unlocking the database must be thoroughly documented.

- - 1. Data Backup and Recovery

Throughout the data management process in the study, the database should be regularly backed up.

In the event of irreparable database corruption, the most recent backup database should be used for restoration, and the corresponding data should be re-entered as necessary. The final dataset shall be stored either on a read-only CD or through a reliable cloud backup. The relevant computers must have appropriate and valid antivirus protection in place.

- - 1. Data Storage

During the study, all collected original data (such as eCRF and electronic data) should be securely stored. These original documents are part of the audit trail that traces back to the source data and should be protected with the same rigor as the electronic audit trail, which records any modifications or backups of the database.

- - 1. Data Confidentiality

Data confidentiality is a fundamental principle in clinical research and development. Organizations involved in drug development should establish appropriate procedures to ensure database confidentiality. This includes creating and signing confidentiality agreements to regulate personnel conduct and implementing security systems to prevent data breaches.

1. Appendix: Adverse Events (AEs) and Serious Adverse Events (SAEs) – Definitions, Severity, and Causality
   1. Further Details and Explanations on the Definition of AE

Adverse Event (AE): Any unfavorable medical occurrence in a subject after receiving the study product, which may present as symptoms, signs, diseases, or laboratory abnormalities. These events do not necessarily have a causal relationship with the study product.

Pregnancy-related events are not reported as AEs.

- 1. Further Details and Explanations on the Definition of SAE

Elective surgeries planned prior to subject enrollment are not reported as SAEs.

- 1. Severity

The severity of adverse events following vaccination is assessed according to the Guidelines for Grading Adverse Events in Preventive Vaccine Clinical Trials, issued by the NMPA on December 31, 2019. The grading standards for adverse event severity are as follows:

**Tanble 4 Grading table of adverse events at inoculation site (local)**

| Symptom/Sign | Grade 1 | Grade2 | Grade3 | Grade4 |
| --- | --- | --- | --- | --- |
| Pain | | | | |
| Pain | Minimal or mild discomfort, no impact on limb activity | Affects limb activity | Affects daily life | Loss of basic self-care or hospitalization |
| Induration*****, Swelling** (Optional)# | | | | |
| >14 years | Diameter 2.5–<5 cm or area 6.25–<25 cm², no impact on daily life | Diameter 5–<10 cm or area 25–<100cm², no impact on daily life | Diameter ≥10 cm or area ≥100 cm² or causes symptoms such as restricted limb movement, lymphadenopathy, or drainage affecting daily life | Blistering, ulcerative dermatitis, necrosis, or deep tissue necrosis |
| Erythema*****, Redness** (Optional)# | | | | |
| >14 years | Diameter 2.5–<5 cm or area 6.25–<25 cm², no impact on daily life | Diameter 5–<10 cm or area 25–<100 cm², affects daily life | Diameter ≥10 cm or area ≥100 cm² or associated symptoms affecting daily life | Blistering, ulcerative dermatitis, necrosis, or deep tissue necrosis |
| **Other** | | | | |
| Itching | Itching at the injection site that relieves within 48 hours after self-care or treatment | Itching at the injection site that does not resolve within 48 hours after treatment | Affects daily life | NA |

Notes:

* In addition to grading based on direct diameter measurements, the progression of measurement results should also be recorded.

** The maximum measured diameter or area should be used.

# The grading of induration and swelling, as well as rash and erythema, should be based on functional impact and actual measurements, with the higher grading criterion being selected.

**Table 5 Grading of Vital Signs**

| Vital Sign | Grade 1 | Grade2 | Grade3 | Grade4 |
| --- | --- | --- | --- | --- |
| Fever (Axillary Temperature, °C) | | | | |
| >14 years | 37.3～＜38.0 | 38.0～＜38.5 | 38.5～＜39.5 | ≥39.5, lasting more than 3 days |

**Table 6 Systemic (Non-Local) Adverse Event Grading**

| Organ System / Symptom | Grade 1 | Grade2 | Grade3 | Grade4 |
| --- | --- | --- | --- | --- |
| Gastrointestinal System | | | | |
| Diarrhea | Mild or transient, 3–4 times/day, loose stools, or mild cramping lasting ≤1 week | Moderate or persistent, 5–7 times/day, loose stools, or cramping lasting >1 week | ≥7 times/day, loose stools, or resulting in severe symptoms such as hypotension, electrolyte imbalance, dehydration, or needing IV fluids >2L | Life-threatening, requiring hospitalization |
| Constipation* | Requires stool softeners or dietary adjustment | Requires laxatives | Needs manual disimpaction or enemas | Severe toxicity causing intestinal obstruction |
| Dysphagia | Discomfort with swallowing solids | Limited to soft diet | Limited to liquid diet, cannot tolerate solid foods | Unable to tolerate any oral intake, requires tube feeding |
| Appetite Loss | Appetite decreases but does not reduce food intake significantly | Decreased intake, significant reduction | Appetite decrease with body weight loss or nutritional decline | Requires nutritional support (e.g., tube feeding or intravenous nutrition) |
| Vomiting | 1–2 times/24 hours, minimal impact on activity | 3–5 times/24 hours, activity affected | ≥6 times/24 hours or requiring IV fluids | Life-threatening, requires hospitalization or urgent care |
| Nausea | Mild (<24 hours) with normal food intake | Persistent, affects intake to some extent (24–48 hours) | Persistent nausea limiting food intake ≥48 hours or requiring IV fluids | Threatens life (e.g., risk of aspiration) |
| Musculoskeletal and Connective Tissue Disorders | | | | |
| Myalgia (Non-Injection Site) | Does not affect daily activities | Affects daily activities | Severe muscle pain, significantly impacts daily activities | Emergency visit or hospitalization |
| Arthritis | Mild pain, with swelling, erythema, or joint stiffness, but does not limit function | Moderate pain, with swelling, erythema, or joint stiffness, but does not affect daily activities | Severe pain, requiring analgesics and/or mobility aids, impacting daily activities | Permanent disability or irreversible joint injury |
| Arthralgia | Mild pain, does not limit function | Moderate pain, may affect function | Severe pain requiring analgesics and/or mobility aids, impacting daily activitie | Persistent pain with functional loss |
| Nervous System | | | | |
| Headache | Does not affect daily activities, no treatment needed | It is transient and mildly affects daily activities and may require treatment or intervention | Severe, impacts daily activities, requires intensive treatment | Life-threatening, requires emergency care or hospitalization |
| Syncope | Near syncope, no loss of consciousness (e.g., pre-syncope) | Loss of consciousness, but no intervention required | Loss of consciousness, requires intervention or hospitalization | NA |
| New-Onset Seizures | | | | |
| ≥18岁 | NA | NA | 1–3 seizures | Prolonged or multiple seizures (e.g., status epilepticus) or difficult to control (e.g., life-threatening epilepsy) |
| Respiratory System | | | | |
| Cough | Transient, no treatment needed | Persistent cough, requires treatment, ineffective | paroxysmal cough, uncontrolled by treatment | Emergency or hospitalization |
| Acute bronchospasm | Transient, no treatment needed; FEV1% 70–80% | Need medical treatment; Bronchodilator treatment returned to normal; FEV1% is 50% ~ 70% | Bronchodilator therapy does not return to normal; FEV1% is 25% ~ 50% or intercostal depression | Severe, FEV1% <25% or requires mechanical ventilation |
| Dyspnea (Breathing Difficulty) | Mild, occurs with exertion only | Moderate, occurs with normal activity | Severe, occurs with minimal activity | Life-threatening, occurs at rest |
| Skin and Subcutaneous Tissue Disorders | | | | |
| Non-injection Site Rash (No Skin Damage) | Mild itching, does not affect daily life | Itching affects daily life | Severe itching prevents daily activities | NA |
| Skin/Mucosal Abnormalities | Erythema/itching/color change | Diffuse rash/maculopapular rash/dryness/desquamation | Vesicular/exudation/desquamation/ulceration | Exfoliative dermatitis involving mucous membranes, or erythema multiforme, or suspected Stevens-Johnson syndrome |
| Nervous System | | | | |
| Insomnia* | Mild sleep difficulty, no or minimal impact on daily life | Moderate sleep difficulty, affects daily life | Severe sleep disturbance, significant impact on daily life, requires treatmentor hospitalization | NA |
| Irritability/Inhibition | Mild irritability or inhibition | Easily irritable or has difficulty sleeping | Lack of response to external stimuli or low awareness | NA |
| Psychiatric disorders (including anxiety, depression, mania, and confusion) should report detailed symptoms | Mild symptoms, does not require intervention or minimally affects daily life | With clinical symptoms requiring medical consultation or behavior affecting daily life | Requires hospitalization or inability to perform daily activities independently | Tendency to harm self or others, acute mental confusion, or loss of basic self-care ability |
| Immune System | | | | |
| Acute Allergic Reaction** | Localized urticaria (water blisters), no systemic symptoms | Localized urticaria requiring treatment or mild angioedema not requiring treatment | Generalized urticaria or angioedema requiring treatment, or mild bronchospasm | Anaphylactic shock or life-threatening bronchospasm or laryngeal edema |
| Other | | | | |
| Fatigue | No impact on daily activities | Affects normal daily activities | Severely affects daily activities, unable to work | Emergency visit or hospitalization |
| Pain at Non-Injection Sites# (Specify location at reporting) | Mild pain, no or minimal impact on daily life | Pain affects daily activities | Pain preventing daily activities | Disabling pain with loss of basic self-care ability |

Notes:

FEV1% refers to the ratio of Forced Expiratory Volume in 1 second (FEV1) to Forced Vital Capacity (FVC).

* Changes in constipation and insomnia before and after vaccination should be monitored.

** Refers to Type I hypersensitivity reactions.

# Refers to non-injection site pain other than myalgia, arthralgia, or headache.

For adverse events not covered in the grading tables above, refer first to the Guidelines for Grading Adverse Events in Preventive Vaccine Clinical Trials. If the guidelines do not provide criteria for evaluation, assess the severity according to the following standards.

**Table 7 General Grading Criteria for Other Adverse Events**

| Grade 1 | Grade2 | Grade3 | Grade4 | Grade5 |
| --- | --- | --- | --- | --- |
| Mild: Short duration (<48h) or slight discomfort, no impact on activities, no treatment required. | Moderate: Moderate or mild impact on activities, may require minimal or no treatment. | Severe: Significant impact on activities, requires intervention, may require hospitalization. | Life-threatening: Potentially life-threatening, severe impact on activities, requires intensive treatment. | Death. |

- 1. Causality

The investigator should have measures in place to promptly assess the relationship between adverse events and vaccination, in order to detect SAEs and group-related or trend-related adverse events associated with vaccination during the study. This allows for timely suspension or termination of the study to minimize harm to subjects.

General principles of relevance judgment:

Definitely Related: Evidence of vaccination with the study vaccine exists; the timing of the adverse event is reasonable relative to vaccination; the adverse event is more reasonably explained by the study vaccine than by other causes; positive response upon re-vaccination; the adverse event is consistent with prior knowledge of this vaccine or similar vaccines.

Probably Related: Evidence of vaccination with the study vaccine exists; the timing of the adverse event is reasonable relative to vaccination; the adverse event is more reasonably explained by the study vaccine than by other causes.

Possibly Related: Evidence of vaccination with the study vaccine exists; the timing of the adverse event is reasonable relative to vaccination; the adverse event cannot be ruled out as being caused by the study vaccine, although other causes are also possible.

Unlikely Related: Evidence of vaccination with the study vaccine exists; the adverse event is more likely to be caused by other factors; negative or uncertain response upon re-vaccination.

Definitely Unrelated: The subject did not receive the study vaccine; or the timing of the adverse event is inconsistent with vaccination; or there is another significant cause that can explain the adverse event.

For statistical analysis, “Definitely Related,” “Probably Related,” and “Possibly Related” are considered adverse events "related" to the study vaccine, while “Unlikely Related” and “Definitely Unrelated” are considered adverse events "unrelated" to the study vaccine.

As the investigator’s understanding of AE/SAE is a progressive process, the initial report may contain uncertain causality information. As information accumulates or updates in subsequent visits, the investigator may revise the initial causality assessment. In such cases, AE/SAE follow-up is required, especially for SAEs, to ensure that relevant information is updated.

1. Appendix: Definitions and Supportive Operational Details
   1. Contraception and Pregnancy Testing
      1. Definitions Related to Fertility

Women of Childbearing Potential: Women from menarche until menopause are considered capable of childbearing unless it has been confirmed that they have undergone a hysterectomy, bilateral salpingectomy, and bilateral oophorectomy.

Postmenopausal Women: Women who have ceased normal menstruation for 12 consecutive months with no other medical cause.

- - 1. Contraception

Female subjects must not be pregnant or breastfeeding. Women of childbearing potential (WOCBP) must use reliable contraceptive methods and should not have plans for pregnancy or childbirth within 7 months. Pregnancy is an exclusion criterion for each vaccine dose, and WOCBP are required to use effective contraception for 7 months following the first vaccine dose.

- - 1. Pregnancy Testing

WOCBP (all women from menarche until menopause) must undergo a urine pregnancy test (colloidal gold test strip) prior to each vaccination. The urine pregnancy test must be performed on the day of vaccination and before vaccination takes place. No sample storage is required after testing.

Pregnancy is an exclusion criterion for each vaccine dose, and WOCBP are required to use effective contraception for 7 months after the first vaccine dose. However, it is still possible for participants to become unintentionally pregnant during the study. Pregnancy events occurring from vaccination through 6 months after the full immunization must be reported. Investigators are required to complete the "Pregnancy Event Report Form."

Researchers must closely follow up with pregnant subjects to obtain information on pregnancy outcomes (e.g., details of childbirth and neonatal status or pregnancy termination) and update the "Pregnancy Event Report Form."

Pregnancy itself is not considered a serious adverse event; however, any complications during pregnancy will be regarded as adverse events and may be considered serious adverse events in certain cases, such as spontaneous abortion, stillbirth, fetal death, and congenital abnormalities in the infant. Elective termination of pregnancy due to maternal choice, in the absence of fetal abnormalities, is not considered an adverse event.

Management of Pregnancy Events During Vaccination:

- If pregnancy occurs after the first dose but before the vaccination schedule is complete, the subject must not receive the second dose until the pregnancy has concluded (e.g., full-term birth, miscarriage, or abortion). The investigator will maintain regular contact with the subject to conduct pregnancy assessments.
- If pregnancy is discovered after the subject has completed the full vaccination schedule, the subject may complete study visits according to the trial protocol and at the discretion of the investigator.

1. Appendix: Glossary of Terms

List of Abbreviations

| **Abbreviation** | **English full name** |
| --- | --- |
| AE | Adverse Event |
| AESI | Adverse Events of Special Interest |
| NMPA | National Medical Products Administration |
| CI | Confidence Interval |
| CDC | Centers for Disease Control |
| CEC | Clinical Event Committee |
| CRF | Case Report Form |
| CHO cell | Chinese Hamster Ovary cell |
| CIOMS | Council for International Organizations of Medical Sciences |
| CRO | Contract Research Organization |
| eCRF | Electronic Case Report Form |
| EDC | Electronic data capture |
| IRB | Institutional Review Board |
| FAS | Full Analysis Set |
| GCP | Good Clinical Practice |
| GMC | Geometric Mean Concentration |
| GMFI | Geometric Mean Fold Increase |
| HZ | Herpes Zoster |
| IDMC | Independent Data Monitoring Committee |
| LOCF | Last Observation Carried Forward |
| MedDRA | Medical Dictionary for Regulatory Activities |
| PCR | Polymerase Chain Reaction |
| PHN | Post-herpetic Neuralgia |
| PPS | Per Protocol Set |
| PT | Preferred Term |
| PV | Pharmacovigilance |
| qPCR | Real-time Quantitative PCR Detecting System |
| SAE | Serious Adverse Event |
| SOC | System Organ Class |
| SOP | Standard Operation Procedure |
| SS | Safety Set |
| SUSAR | Suspected Unexpected Serious Adverse Reaction |
| TEAE | Treatment Emergent Adverse Event |
| VZV | Varicella Zoster Virus |
| WHODD | WHO Drug Dictionary |
| ZBPI | Zoster Brief Pain Inventory, |

Glossary of Terms

| **Term** | **Definition** |
| --- | --- |
| **Case Report Form (CRF)** | Refers to a paper or electronic document designed according to the protocol requirements, used to record subject-related information and report it to the sponsor. |
| **Audit** | Refers to a systematic and independent examination of clinical trial-related activities and documents to determine whether the conduct of the study, as well as the recording, analysis, and reporting of study data, are in compliance with the protocol, standard operating procedures (SOPs), and applicable regulatory requirements. |
| **Monitoring** | Refers to overseeing the progress of a clinical trial to ensure it is conducted, recorded, and reported properly according to the protocol, SOPs, and relevant regulations. |
| **Blinding** | Refers to the process in a clinical trial where one or more parties are unaware of the treatment assignments. Single-blind may mean that either the subject or the investigator/monitor is unaware, while double-blind typically means that subjects, investigators, monitors, and data analysts are all unaware of the treatment allocation. |
| **Randomization** | Refers to the process or method used in a clinical trial to ensure that each subject has an equal chance of being assigned to the treatment or control group, without being influenced by the preferences of the investigator and/or the subject. |
| **Study Vaccine** | Refers to the vaccine or placebo used in a clinical trial. |
| **Subject** | Refers to an individual who participates in a clinical trial and receives the investigational product. |
| **Dropout** | Refers to a subject who, for any reason, is unable to continue the clinical trial through to the final required follow-up visit as specified in the protocol. |
| **Investigator’s Brochure** | Refers to a compilation of clinical and non-clinical data on the investigational product relevant to the study of the product in human subjects. |
| **Adverse Event** | Refers to any adverse medical events in a subject after receiving the investigational product, which may manifest as symptoms, signs, diseases, or laboratory abnormalities, and does not necessarily have a causal relationship with the investigational product. |
| **Solicited Adverse Event** | An adverse event collected as a safety endpoint in a clinical trial, occurring within a specified follow-up period after vaccination, and proactively recorded by the investigator or subject. Such events are pre-listed in the protocol and Case Report Form (CRF). |
| **Unsolicited Adverse Event** | Any adverse event that is not pre-listed in the protocol or CRF as a solicited adverse event. |
| **Serious Adverse Event** | An adverse event that results in death, is life-threatening, causes permanent or significant disability/incapacity, requires hospitalization or prolongation of existing hospitalization, or results in a congenital anomaly or birth defect. |

Relevant Definitions

| **Term** | **Definition** |
| --- | --- |
| **Month** | 30 days |
| **Women of Childbearing Potential** | Females are considered to have childbearing potential from the onset of menarche until menopause, unless it is clearly documented that they have undergone hysterectomy, bilateral salpingectomy, and bilateral oophorectomy. |
| **Significant Medical History** | Refers to a history of medical conditions that required emergency treatment, hospitalization, and/or surgery. |
| **Antibody Positivity Rate and Seroconversion Rate** | (1) Specific Antibody Concentration (ELISA): A serum varicella-zoster virus (VZV) gE-specific antibody concentration ≥ 0.1 IU/mL (or 100 mIU/mL) is considered antibody positive. (2) Antibody Positivity Rate: The proportion of subjects with positive serum antibody both before and after immunization. (3) Seroconversion: Defined as a ≥4-fold increase in antibody concentration after immunization compared to before immunization. (4) Seroconversion Rate: The percentage of subjects who achieve seroconversion after immunization. |
| **Antibody Fold Increase** | Specific gE antibody concentration (ELISA): the fold increase in antibody concentration after immunization compared to before immunization. |
| **Suspected HZ Case** | Suspected HZ cases are defined as newly developed, unilateral clusters of vesicles or papulovesicles distributed along a peripheral nerve, typically accompanied by neuralgia, without other identifiable causes. A suspected HZ case meets at least one of the following diagnostic criteria:   1. Unilateral rash; 2. Vesicles distributed in a dermatomal, clustered pattern along a peripheral nerve; 3. Neuralgia. |
| **Laboratory-Confirmed Case** | A case that meets the criteria for a suspected herpes zoster (HZ) case, is positive for VZV by qPCR testing, and is finally adjudicated as herpes zoster by the Clinical Event Committee (CEC). |
| **Clinically Confirmed Case** | A case that meets the criteria for a suspected herpes zoster (HZ) case but, due to failure to collect a valid sample, insufficient sample volume for laboratory testing, or a negative laboratory result, is adjudicated as herpes zoster by the Clinical Event Committee (CEC). |
| **Valid Endpoint Case** | A laboratory-confirmed case or a clinically confirmed case, as adjudicated by the Clinical Event Committee (CEC), occurring 30 days after the full immunization. |
| **Herpes Zoster-Associated Pain** | Pain that occurs during the acute phase of herpes zoster infection or after lesion healing, including acute herpes zoster-associated pain and postherpetic neuralgia (PHN). |
| **ZBPI Score** | The score for item 3 of the Zoster Brief Pain Inventory (ZBPI), which assesses the "worst pain experienced in the past 24 hours," with intensity rated on a scale from 0 to 10. |
| **Postherpetic Neuralgia (PHN)** | Pain persisting for one month or longer after rash healing, which may present as continuous pain or recur after a period of relief. (Based on the "Expert Consensus on the Diagnosis and Treatment of Postherpetic Neuralgia, 2016") |
| **Severe PHN** | Herpes zoster-associated pain persisting for 28 days or more after rash healing, with a ZBPI score of ≥3. |
| **Onset Date** | Defined as the earlier date of the following two events: (1) the date of onset of HZ rash; or (2) the date when pain at the site of subsequent HZ rash was first noticed. |
| **Sampling Time** | The earliest time when vesicle fluid can be collected from a suspected HZ case. |
| **Duration of PHN** | The duration of herpes zoster-associated pain that persists or occurs after the onset of the HZ rash. |
| **End Date** | (1) Crusting and shedding of herpes zoster lesions; and (2) Resolution of herpes zoster-associated pain and any other sequelae (if present). |
| **Acute Herpes Zoster-Associated Pain** | Herpes zoster-associated pain occurring within 28 days after the onset of herpes zoster, with a ZBPI score > 0. A ZBPI score ≥ 3 is considered severe acute herpes zoster-associated pain. |
| **End Time of Herpes Zoster-Associated Pain** | Defined as the time when herpes zoster-associated pain has completely resolved for 28 consecutive days. |

Determination Process for Valid Endpoint Cases


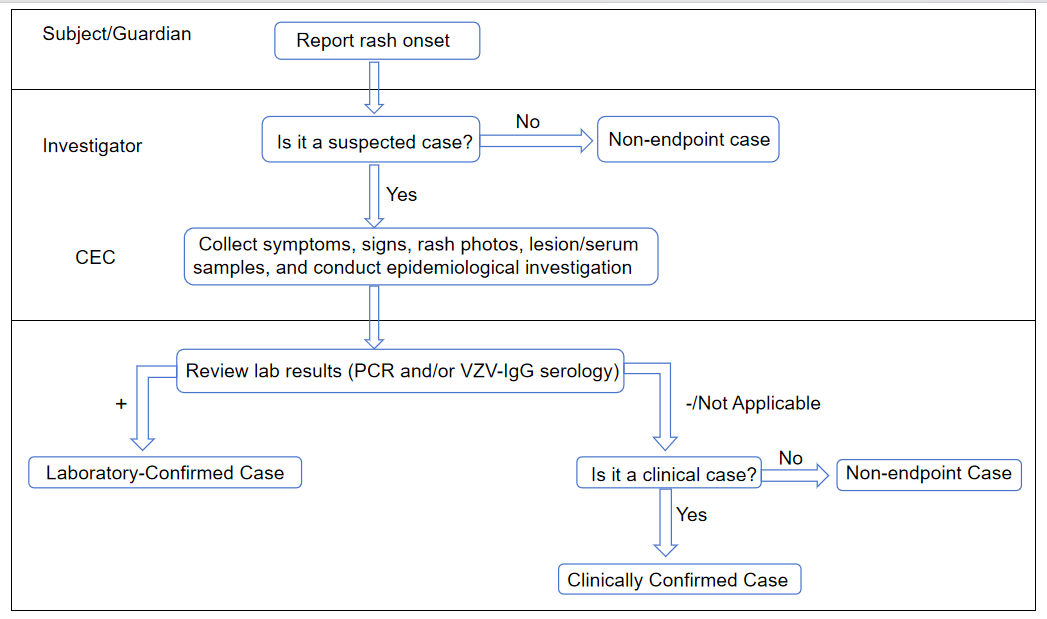


1. Disclosure and Publication of Data

Upon completion of this study, if the results are to be disclosed and/or published, both positive and negative results will be disclosed and/or published. Subject confidentiality will be maintained in accordance with privacy protections.

1. Reference
2. CDC. Prevention of herpes zoster. Recommendations of the Advisory Committee on Immunization Practices (ACIP). MMWR. 2008;57:1–30.
3. Oxman MN, Levin MJ, Johnson GR, et al. Shingles Prevention Study Group. A vaccine to prevent herpes zoster and postherpetic neuralgia in older adults. N Engl J Med. 2005; 352:2271–2284.
4. Cohen JI, Straus SE, Arvin AM. Varicella zoster virus and its replication. 2007; p. 2774-2818. In D. M. Knipe and P. M. Howley (ed.), Fields virology, 5th ed. Lippincott/The Williams & Wilkins Co., Philadelphia, PA.
5. ShingrixTM，https://www.shingrix.com/index.html
6. Leroux-Roels I, Weber F Intanza® 9 µg intradermal seasonal influenza vaccine for adults 18 to 59 years of age. Hum Vaccin Immunother. 2013 Jan;9(1):115-21
7. Godeaux O, Kovac M, Shu D, Grupping K, Campora L, Douha M, Heineman TC, Lal H. Immunogenicity and safety of an adjuvanted herpes zoster subunit candidate vaccine in adults ≥ 50 years of age with a prior history of herpes zoster: A phase III, non-randomized, open-label clinical trial.Hum Vaccin Immunother. 2017 May 4;13(5):1051-1058.
8. WHO. Recommendations to assure the quality, safety and efficacy of recombinant human papillomavirus virus-like particle vaccines[J].2006.
9. Leroux-Roels, I.; Leroux-Roels, G.; Clement, F.; Vandepapeliere, P.; Vassilev, V.; Ledent, E.; Heineman, T.C. A phase 1/2 clinical trial evaluating safety and immunogenicity of a varicella zoster glycoprotein e subunit vaccine candidate in young and older adults.J. Infect. Dis.2012,206, 1280–1290.
10. Bharucha, T.; Ming, D.; Breuer, J. A critical appraisal of ‘Shingrix’, a novel herpes zoster subunit vaccine (HZ/Su or GSK1437173A) for varicella zoster virus.Hum. Vaccines Immunother.2017,13, 1789–1797）。
11. Dai X, Jayapal M, Tay HK,Reghunathan R, et al. Differential signal transduction, membrane trafficking, and immune effector functions mediated by FcγRI versus FcγRIIa. Blood. 2009;114:318-27.
12. The Uppsala Monitoring Centre (2012) The use of the WHO-UMC system for standardised case causality assessment. WHO-UMC web. http://who-umc.org/Graphics/24734.pdf. Accessed 10 Jul 2014.
